# Supplementary material for: Meeting the Needs of Today's Workforce: Child Care Best Practices.
Source: Royal Society of Chemistry journal article supplement (doi:10.1039/c3ra42769b), 1998-01-01
Supplement: c3ra42769b.pdf [file c3ra42769b.pdf]

# Electronic Supplementary Information

## Synthesis and evaluation of fluorescent cap analogues for mRNA labelling

**Marcin Ziemniak<sup>a</sup>, Mariusz Szabelski<sup>b</sup>, Maciej Lukaszewicz<sup>a</sup>, Anna Nowicka<sup>a</sup>, Edward Darzynkiewicz<sup>a</sup>, Robert E. Rhoads<sup>c</sup>, Zbigniew Wieczorek<sup>b</sup>, Jacek Jemielity<sup>a, d\*</sup>.**

*<sup>a</sup> Division of Biophysics, Institute of Experimental Physics, Faculty of Physics, University of Warsaw, Zwirki i Wigury 93, 02-089 Warsaw, Poland*

*<sup>b</sup> Department of Physics and Biophysics, University of Warmia and Mazury in Olsztyn, Oczapowskiego 4, 10-719 Olsztyn, Poland*

*<sup>c</sup> Department of Biochemistry and Molecular Biology, Louisiana State University Health Sciences Center, Shreveport, Louisiana 71130-3932, USA*

*<sup>d</sup> Centre of New Technologies, University of Warsaw, Zwirki i Wigury 93, 02-089 Warsaw, Poland*

Data presented in **Table S1** illustrates effect of polarity of different solvents on the spectroscopic properties of AntOMe and MantOMe. In this study MeOH, EtOH and iPrOH were chosen as appropriate organic solvents since their protic properties and dipole moments provide a close resemblance to water. Despite that absorption maxima and absorption coefficients displays only a slightly variation upon a change of solvent in case of AntOMe a 9 nm shift on changing from PBS to organic solvents was observed. Interestingly, fluorescence of AntOMe and MAntOMe decreases in intensity and is red shifted with increasing solvent polarity. Quantum yields calculated for alcohol solutions are almost five times higher than in phosphate buffer solutions. Time-resolved experiments revealed a tendency to increase fluorescence lifetime if solvent polarity is decreased. The most significant changes were observed for AntOMe as its lifetime in aqueous medium (PBS, pH 5.175) was equal 1.81 ns, however, in ethanol it was prolonged to 8.25 ns (**Table S1**).

**Table S1.** Spectroscopic properties of methyl anthranilate and methyl *N*-methylanthranilate in phosphate buffer and organic solvents.

| compound | Solution         | Absorption            |                                                 | Fluorescence          |       |                                     |
|----------|------------------|-----------------------|-------------------------------------------------|-----------------------|-------|-------------------------------------|
|          |                  | $\lambda_{\max}$ (nm) | $\epsilon_{\lambda_{\max}}$ ( $M^{-1}cm^{-1}$ ) | $\lambda_{\max}$ (nm) | QY    | lifetime                            |
| AntOMe   | PBS<br>pH = 5.18 | 327                   | 4140                                            | 420                   | 0.099 | $\tau = 1.81$ ns $\chi_R^2 = 0.954$ |
|          | PBS<br>pH = 8.96 | 327                   | 4140                                            | 420                   | 0.099 | $\tau = 1.71$ ns $\chi_R^2 = 0.958$ |
|          | MeOH             | 336                   | 5050                                            | 409                   | 0.539 | $\tau = 7.36$ ns $\chi_R^2 = 1.004$ |
|          | EtOH             | 337                   | 5110                                            | 409                   | 0.597 | $\tau = 8.25$ ns $\chi_R^2 = 0.998$ |
|          | iPrOH            | 337.5                 | 5200                                            | 407.5                 | 0.577 | $\tau = 7.84$ ns $\chi_R^2 = 0.977$ |
| MantOMe  | PBS<br>pH = 5.18 | 349.5                 | 4780                                            | 441.5                 | 0.175 | $\tau = 3.50$ ns $\chi_R^2 = 0.946$ |
|          | PBS<br>pH = 8.96 | 349.5                 | 4800                                            | 441.5                 | 0.176 | $\tau = 3.49$ ns $\chi_R^2 = 0.965$ |
|          | MeOH             | 352.5                 | 6110                                            | 423                   | 0.480 | $\tau = 7.23$ ns $\chi_R^2 = 0.987$ |
|          | EtOH             | 353                   | 6170                                            | 422.5                 | 0.513 | $\tau = 8.07$ ns $\chi_R^2 = 1.001$ |
|          | iPrOH            | 352                   | 6230                                            | 419.5                 | 0.493 | $\tau = 7.61$ ns $\chi_R^2 = 0.971$ |

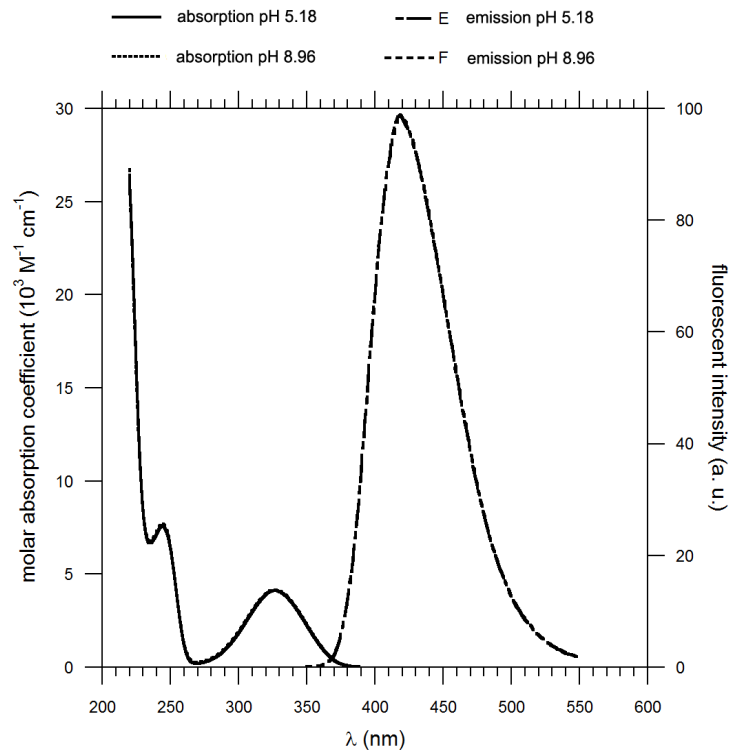

Fig. S1. Absorbance and emission spectra of AntOMe

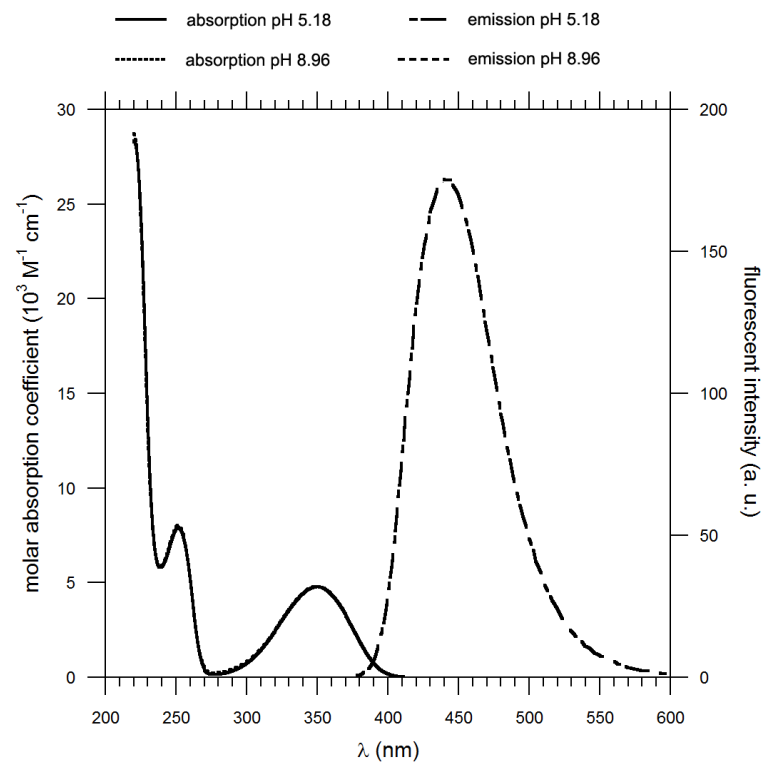

Fig. S2. Absorbance and emission spectra of MantOMe

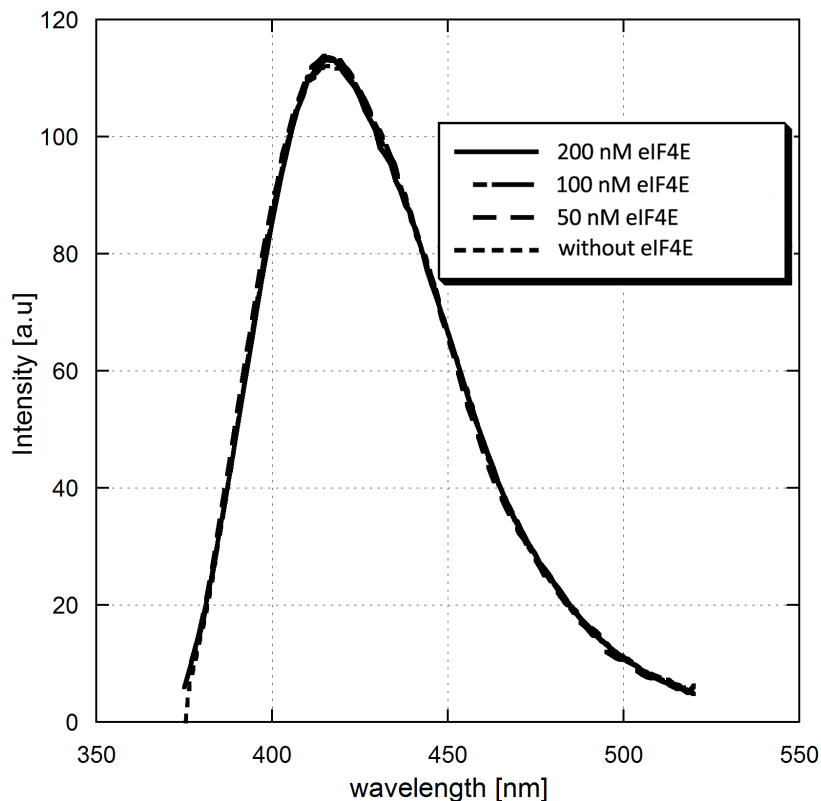

Fig. S3. MantOME fluorescence intensity observed upon addition of increasing amounts of eIF4E protein. The concentration of MantOME was 200 nM and the eIF4E concentrations were in range 50-1000 nM.

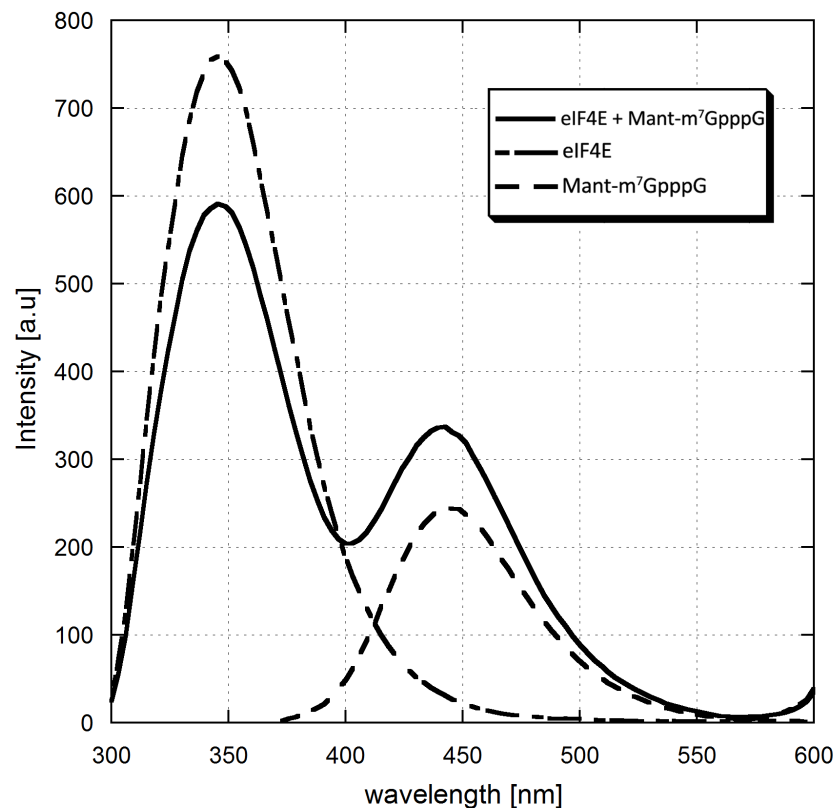

Fig. S4. Changes of fluorescence intensity of Mant-m<sup>7</sup>GpppG and Trp residues in eIF4E upon complex formation. The excitation wavelength used in the experiment was 280 nm (maximum absorption for Trp residues). eIF4E concentration was 100 nM and Mant-m<sup>7</sup>GpppG concentration was 200 nM.

**Table S2.**  $^1\text{H}$  NMR signals of 2' and 3' regioisomers of cap analogues **1-2**

| Proton                     | Ant-m <sup>7</sup> GpppG ( <b>1</b> ) |           | Mant-m <sup>7</sup> GpppG ( <b>2</b> ) |           |
|----------------------------|---------------------------------------|-----------|----------------------------------------|-----------|
|                            | 2' isomer                             | 3' isomer | 2' isomer                              | 3' isomer |
| N8                         | 31.6                                  | 68.4      | 42.7                                   | 57.3      |
| H1' (m <sup>7</sup> G)     | 32.1                                  | 67.9      | 42.9                                   | 57.1      |
| H2'/H3' (m <sup>7</sup> G) | 33.1                                  | 66.9      | 40.9                                   | 59.1      |
| N-CH <sub>3</sub>          | 31.7                                  | 68.3      | -                                      | -         |
| H3 (Ant)                   | 32.6                                  | 67.4      | -                                      | -         |
| H5 (Mant)                  | -                                     | -         | 44.1                                   | 55.9      |
| H6 (Mant)                  | -                                     | -         | 43.1                                   | 56.9      |
| N-CH <sub>3</sub> (Mant)   | -                                     | -         | 41.1                                   | 58.9      |

# Table S3 Conformational and regioisomeric equilibria for some (M)Ant labelled nucleotides

| Compound                                       | Coupling constants                                                                                                                                           | regioisomer equilibrium            | %N conformation                                                                                                           | Amplitude of exponential component from fluorescence lifetimes measurements                                      |
|------------------------------------------------|--------------------------------------------------------------------------------------------------------------------------------------------------------------|------------------------------------|---------------------------------------------------------------------------------------------------------------------------|------------------------------------------------------------------------------------------------------------------|
| Ant-m <sub>2</sub> <sup>7,2'-O</sup> GpppG (5) | J <sub>H1-H2</sub> = 5.5<br>J <sub>H2-H3</sub> = 3.2<br>J <sub>H3-H4</sub> = 3.2                                                                             | 3' isomer = 100%                   | 41 % N conformation                                                                                                       | α <sub>1</sub> = 36.89% α <sub>2</sub> = 63.11% (pH 5)<br>α <sub>1</sub> = 39.03% α <sub>2</sub> = 60.97% (pH 9) |
| Ant-m <sup>7</sup> GpppG (1)                   | J <sub>H1-H2(3')</sub> = 6.0<br>J <sub>H2-H3(3')</sub> = 5.1<br>J <sub>H1-H2(2')</sub> = 3.0<br>J <sub>H2-H3(2')</sub> = 4.5                                 | 2' isomer = 32%<br>3' isomer = 68% | <b>2' isomer:</b><br>62% N conformation<br><b>3' isomer:</b><br>35% N conformation<br><b>total:</b><br>44% N conformation | α <sub>1</sub> = 31.81% α <sub>2</sub> = 68.19% (pH 5)<br>α <sub>1</sub> = 31.72% α <sub>2</sub> = 68.28% (pH 9) |
| Mant-m <sup>7</sup> GpppG (2)                  | J <sub>H1-H2(3')</sub> = 5.7<br>J <sub>H2-H3(3')</sub> = 5.2<br>J <sub>H1-H2(2')</sub> = 2.7<br>J <sub>H2-H3(2')</sub> = 5.1<br>J <sub>H3-H342')</sub> = 5.0 | 2' isomer = 42%<br>3' isomer = 58% | <b>2' isomer:</b><br>71% N conformation<br><b>3' isomer:</b><br>39% N conformation<br><b>total:</b><br>52% N conformation | α <sub>1</sub> = 40.50% α <sub>2</sub> = 59.50% (pH 5)<br>α <sub>1</sub> = 44.98% α <sub>2</sub> = 55.02% (pH 9) |
| Ant-m <sup>7</sup> GDP (6)                     | J <sub>H1-H2(3')</sub> = 5.6<br>J <sub>H1-H2(2')</sub> = 1.8<br>J <sub>H2-H3(2')</sub> = 5.9                                                                 | 2' isomer = 52%<br>3' isomer = 48% | <b>2' isomer:</b><br>81% N conformation<br><b>3' isomer:</b><br>40% N conformation<br><b>total:</b><br>61% N conformation |                                                                                                                  |
| Ant-m <sub>2</sub> <sup>7,2'-O</sup> GMP (8)   | J <sub>H1-H2</sub> = 5.5<br>J <sub>H2-H3</sub> = 2.7<br>J <sub>H3-H4</sub> = 4.5                                                                             | 3' isomer = 100%                   | 40% N conformation                                                                                                        |                                                                                                                  |
| Mant-m <sup>7</sup> GMP (10)                   | J <sub>H1-H2(3')</sub> = 5.6<br>J <sub>H2-H3(3')</sub> = 4.8<br>J <sub>H3-H4(2')</sub> = 3.0<br>J <sub>H1-H2(2')</sub> = 4.2<br>J <sub>H2-H3(2')</sub> = 5.0 | 2' isomer = 42%<br>3' isomer = 58% | <b>2' isomer:</b><br>55% N conformation<br><b>3' isomer:</b><br>40% N conformation<br><b>total:</b><br>46% N conformation |                                                                                                                  |

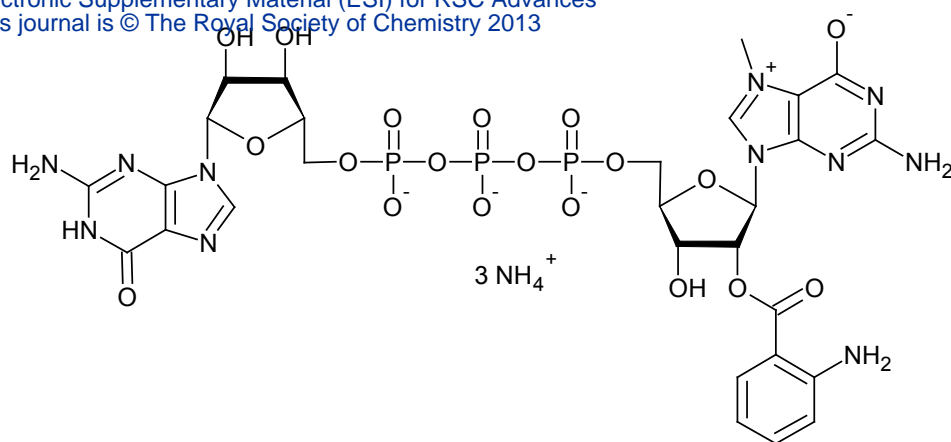

# Ant-m<sup>7</sup>GpppG

**Ziemiak *et al.***  
Synthesis and evaluation of fluorescent  
cap analogues for mRNA labelling  
**supplementary information**

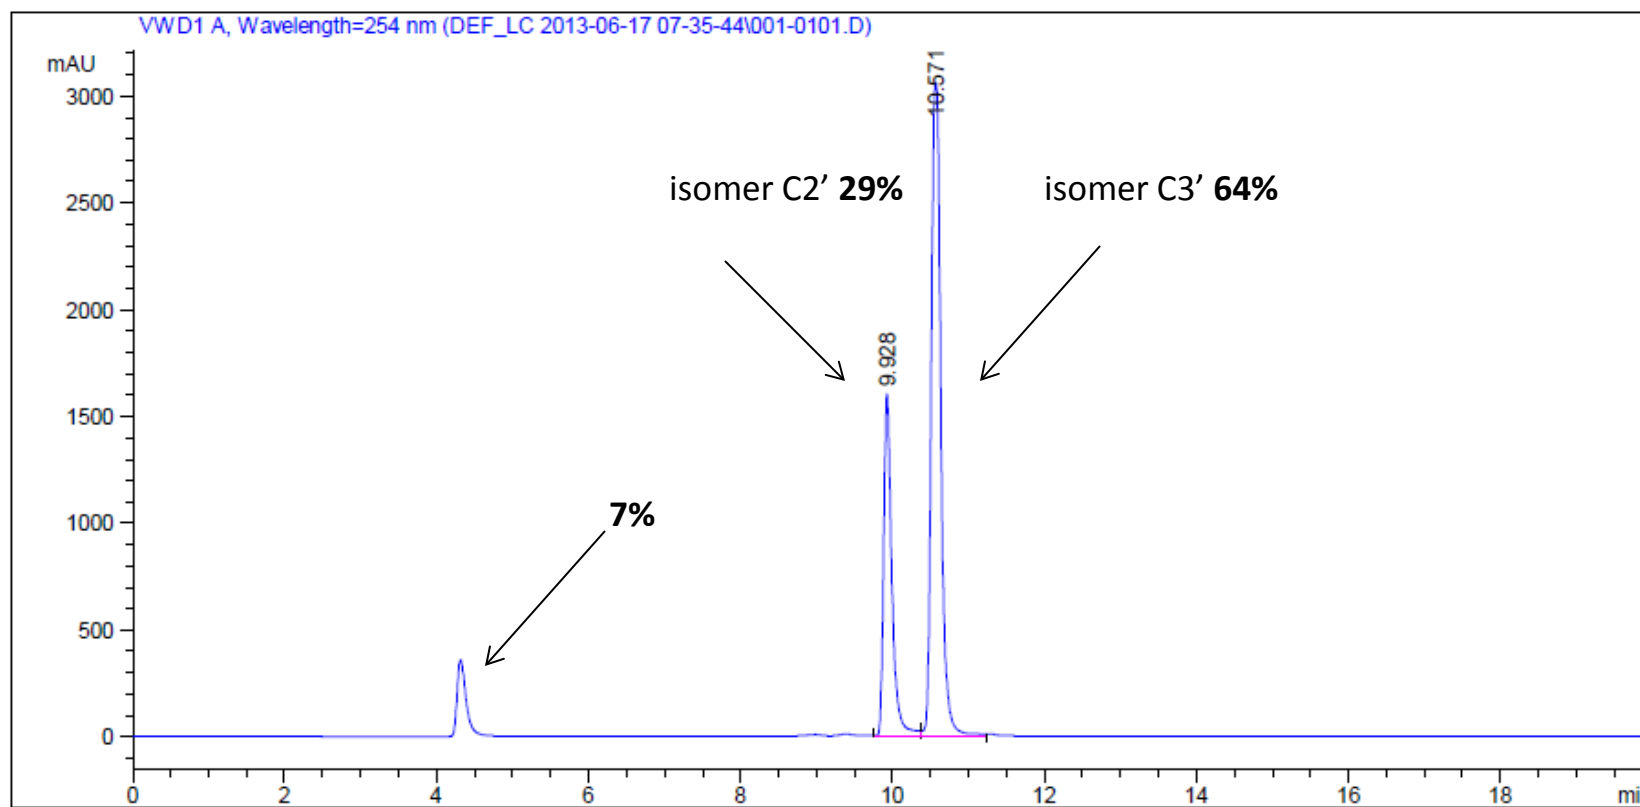

HPLC profile



# Ant-m<sup>7</sup>GpppG

**Ziemniak *et al.***  
Synthesis and evaluation of fluorescent  
cap analogues for mRNA labelling  
**supplementary information**

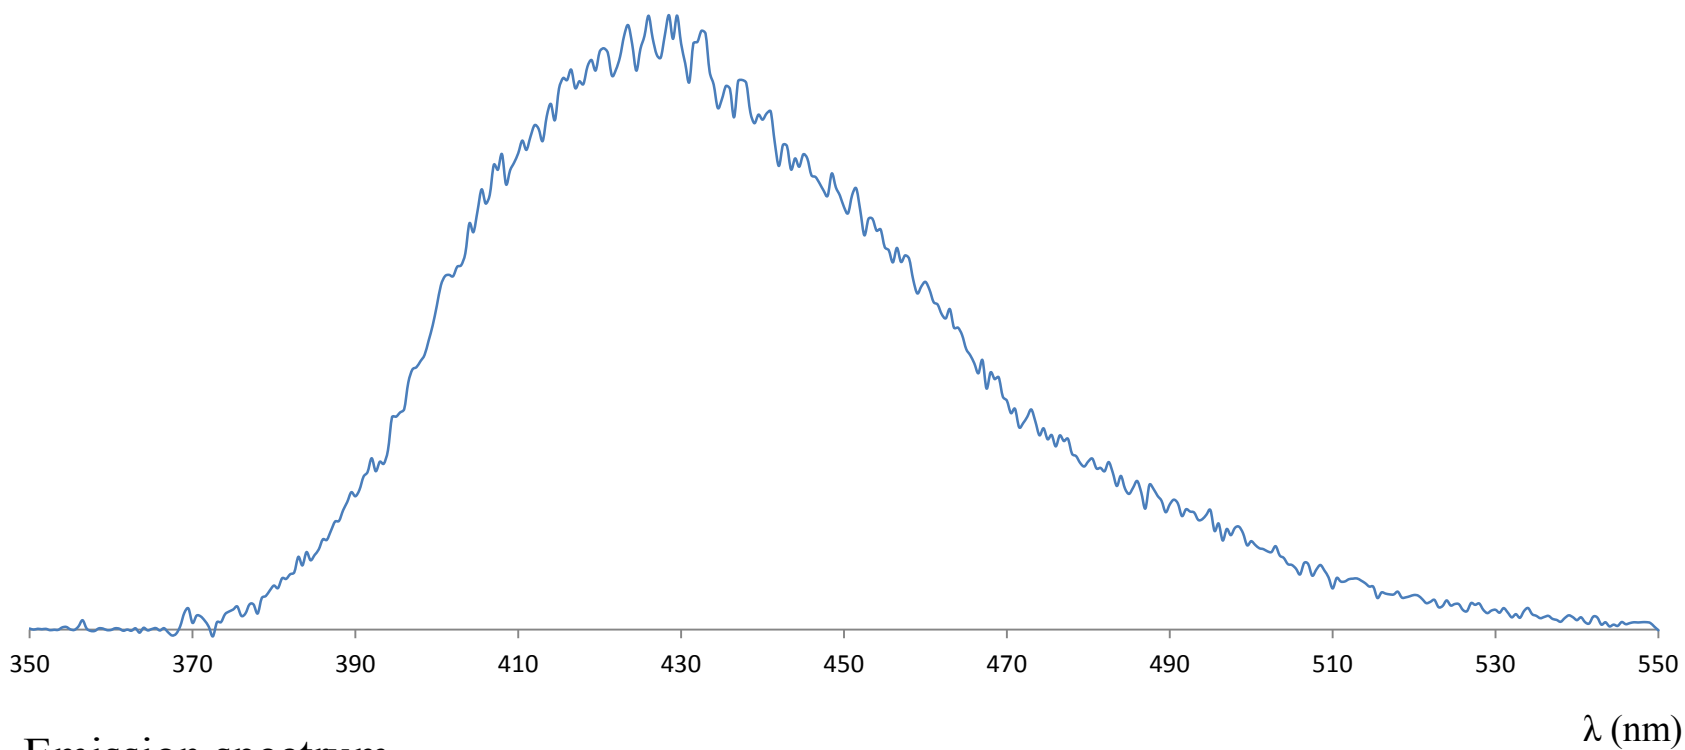

Emission spectrum

λ (nm)

# Ant-m<sup>7</sup>GpppG

**Ziemniak *et al.***  
Synthesis and evaluation of fluorescent  
cap analogues for mRNA labelling  
**supplementary information**

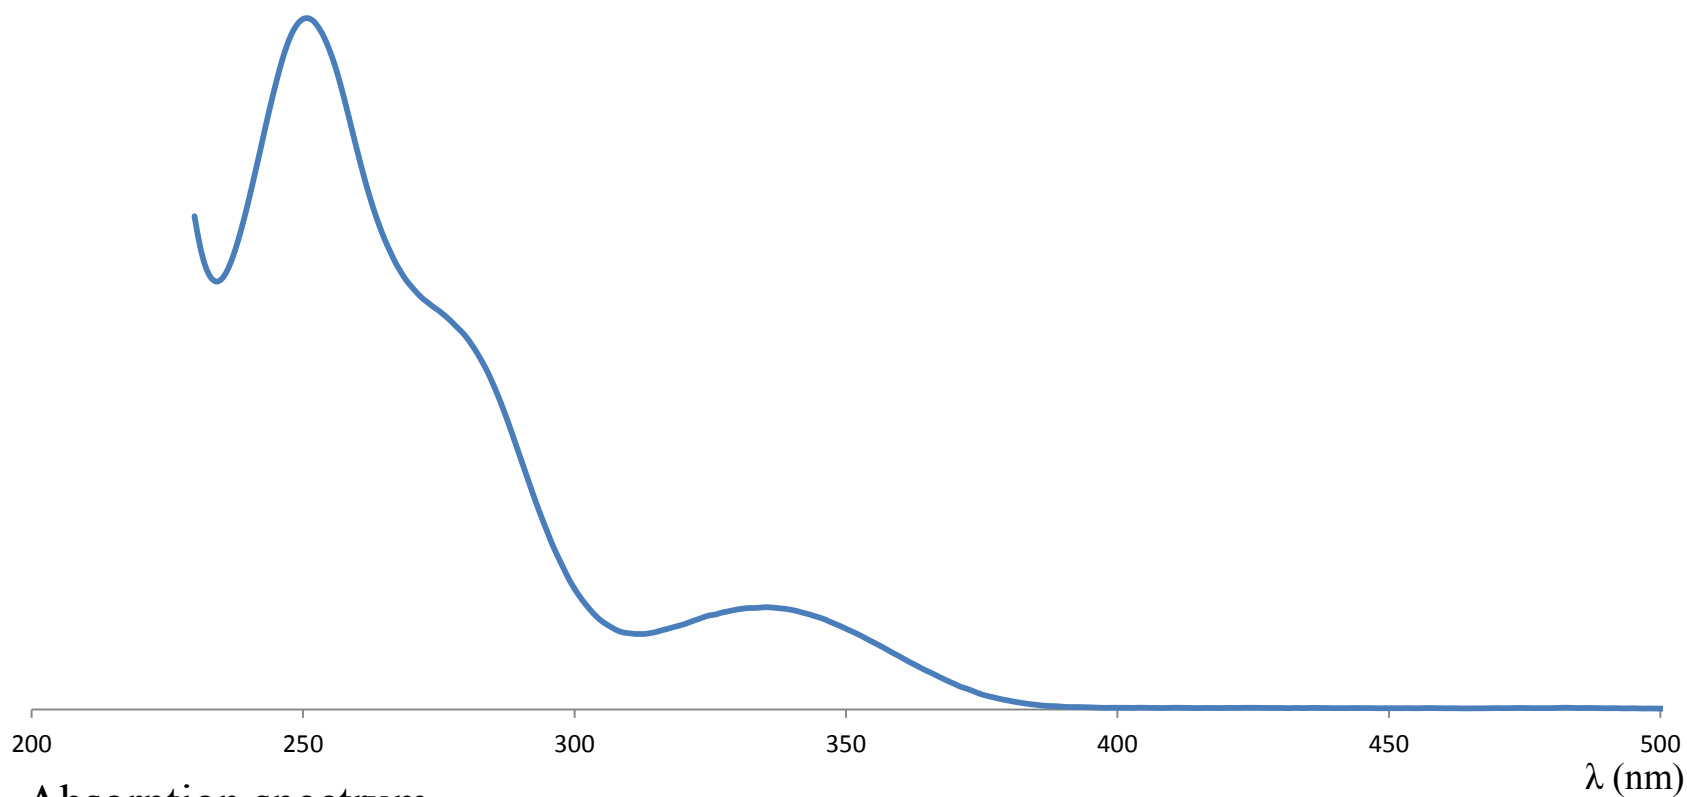

Absorption spectrum

λ (nm)

# Ant-m<sup>7</sup>GpppG

11229ant\_gppp #57-208 RT: 1.02-3.73 AV: 152 NL: 7.19E3  
T: FTMS - p ESI Full ms [300.00-1300.00]

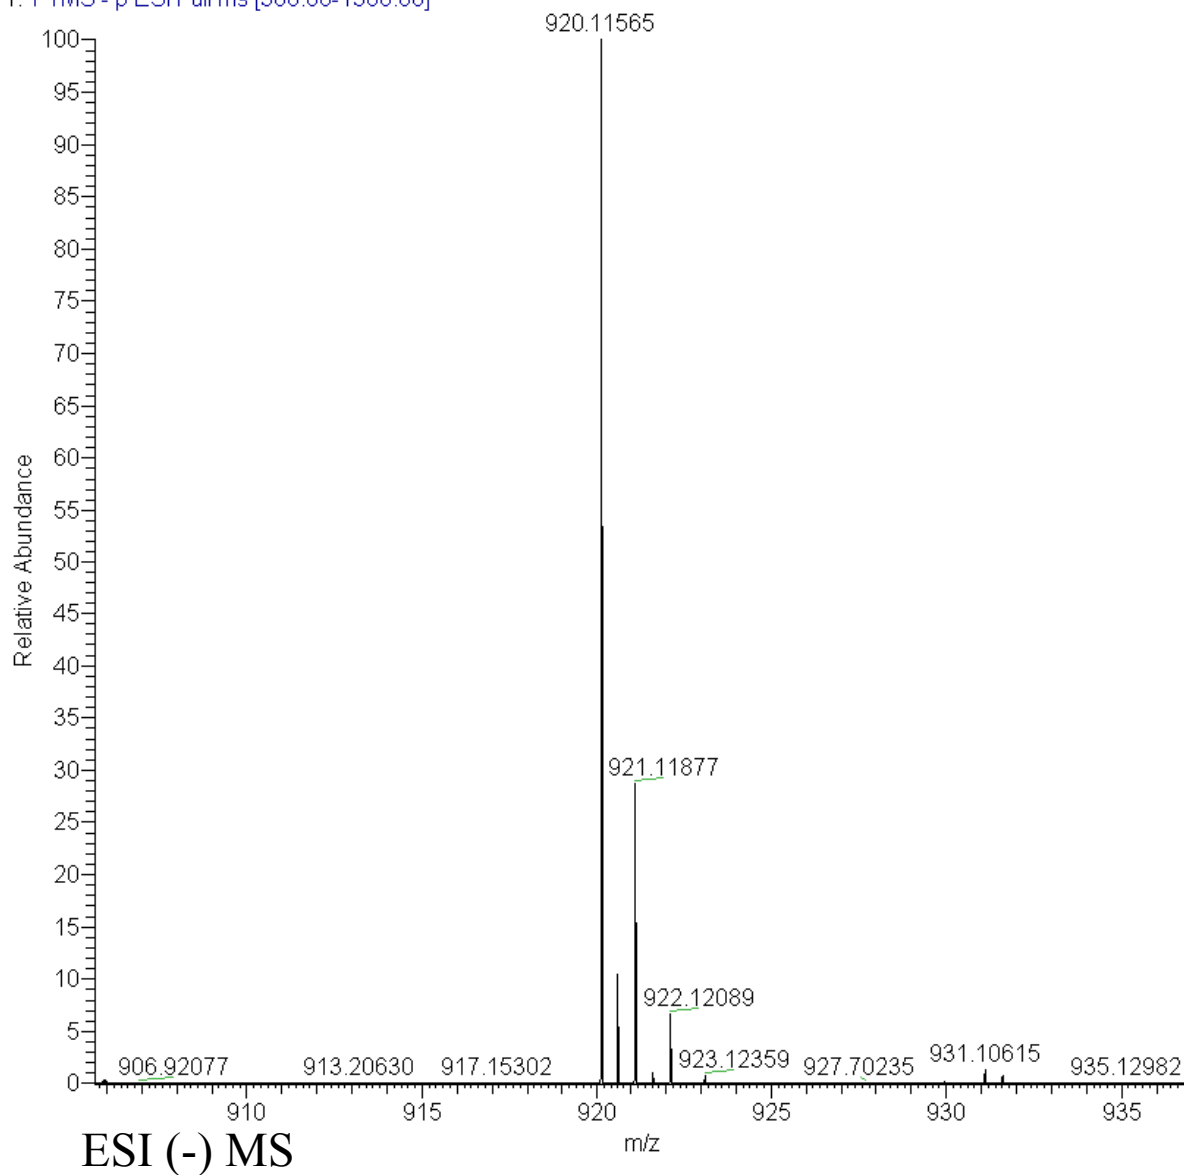

# Ant-m<sup>7</sup>GpppG

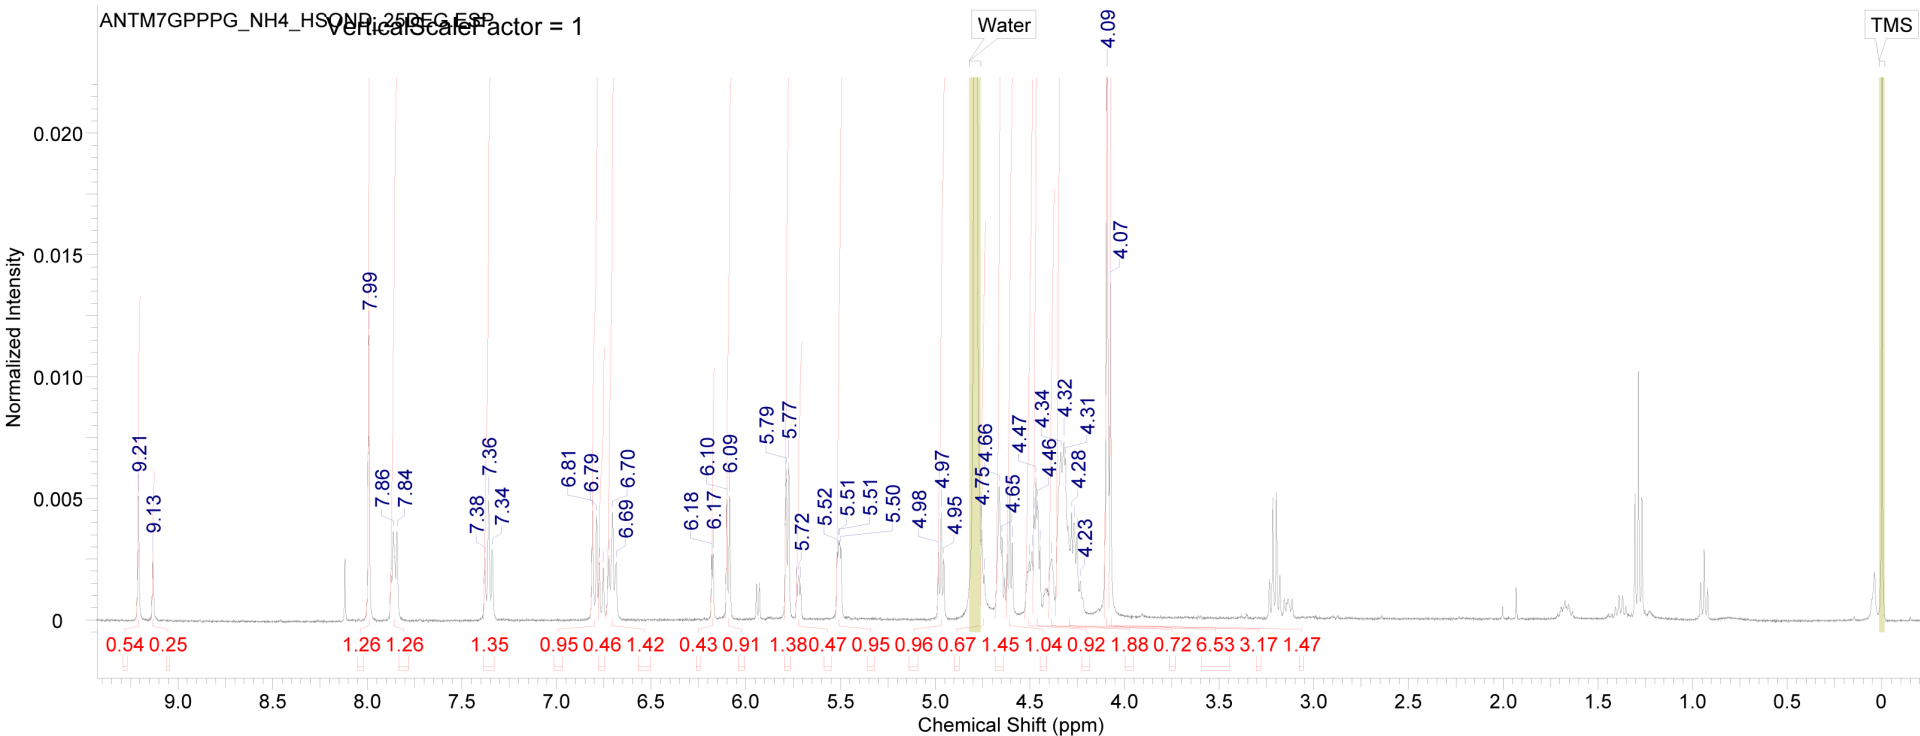

<sup>1</sup>H NMR

# Ant-m<sup>7</sup>GpppG

**Ziemiak *et al.***  
Synthesis and evaluation of fluorescent  
cap analogues for mRNA labelling  
**supplementary information**

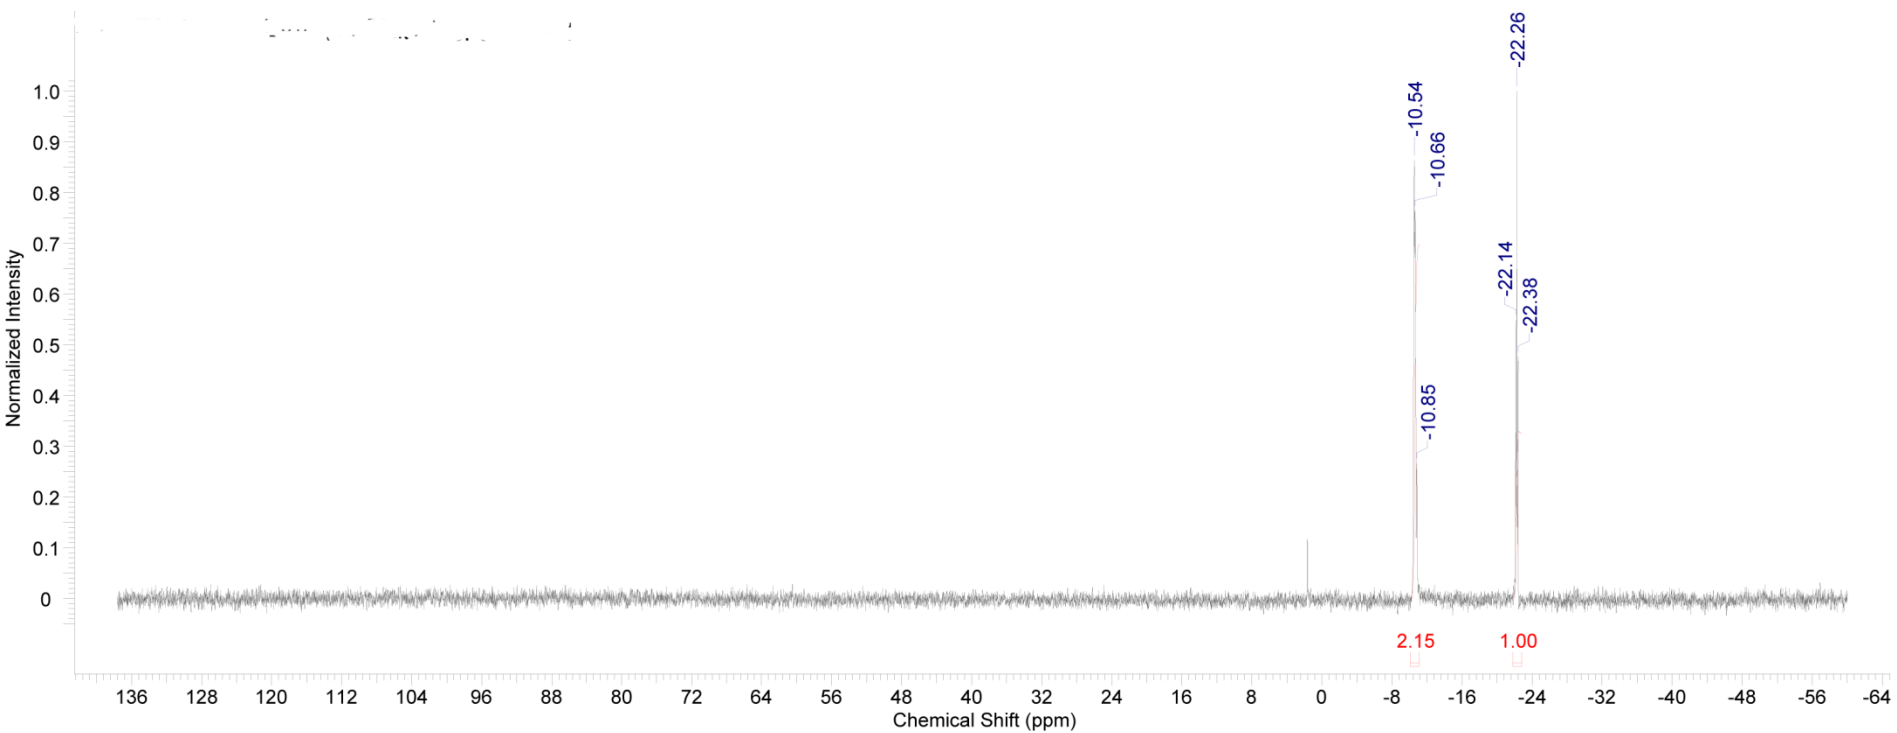

<sup>31</sup>P NMR

# Ant-m<sup>7</sup>GpppG

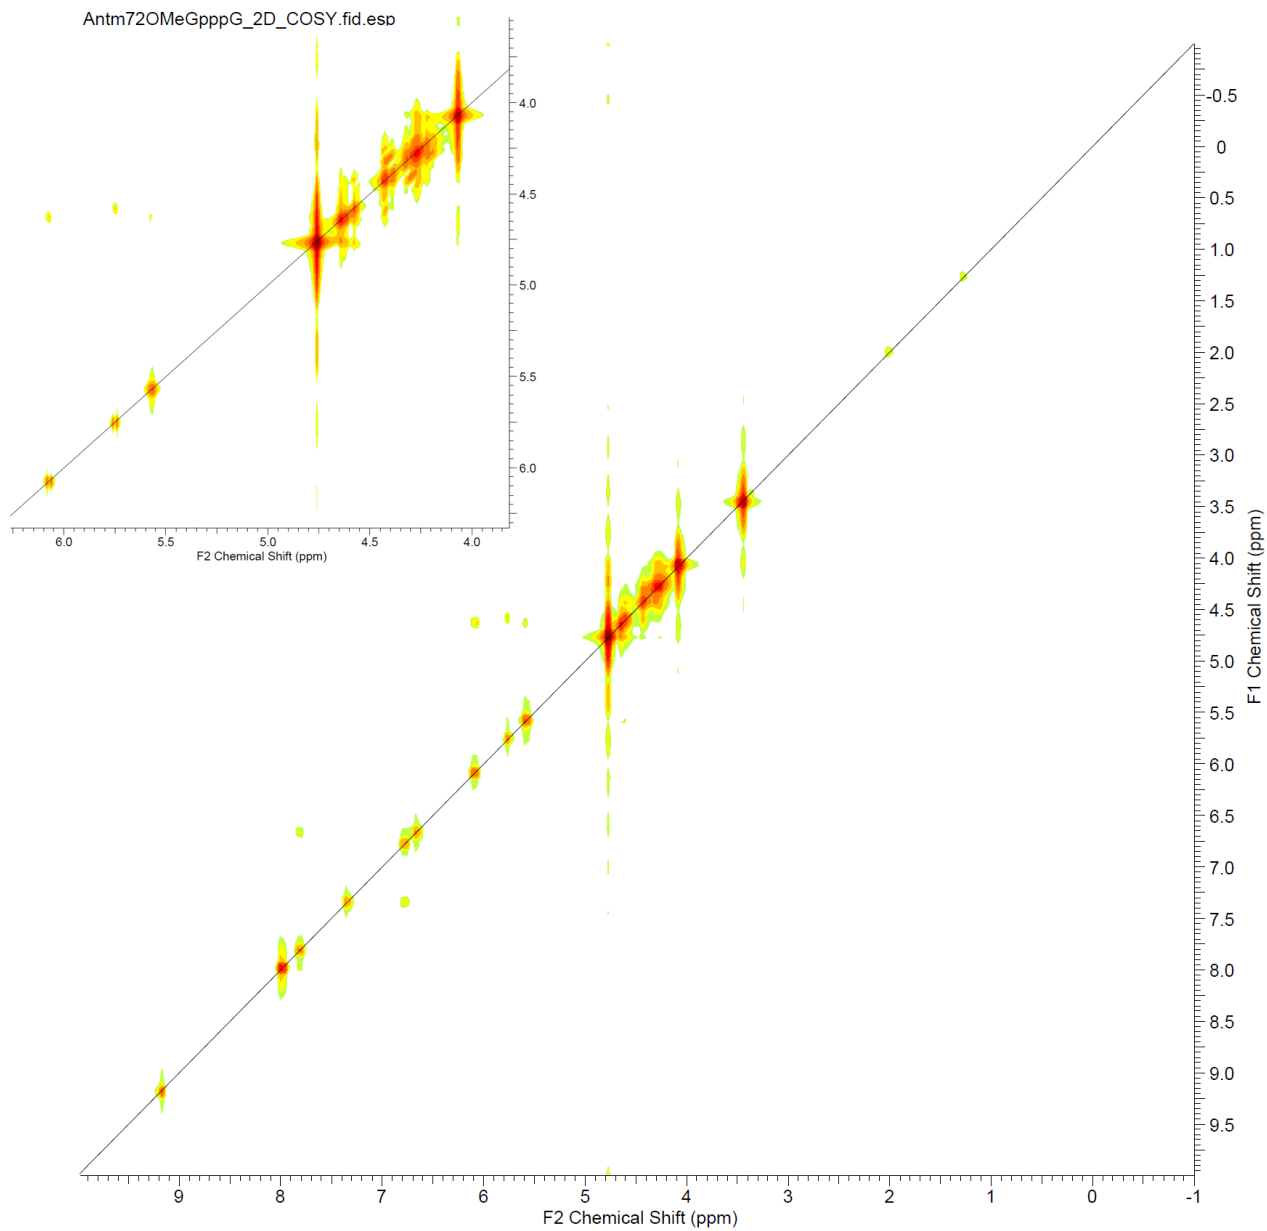

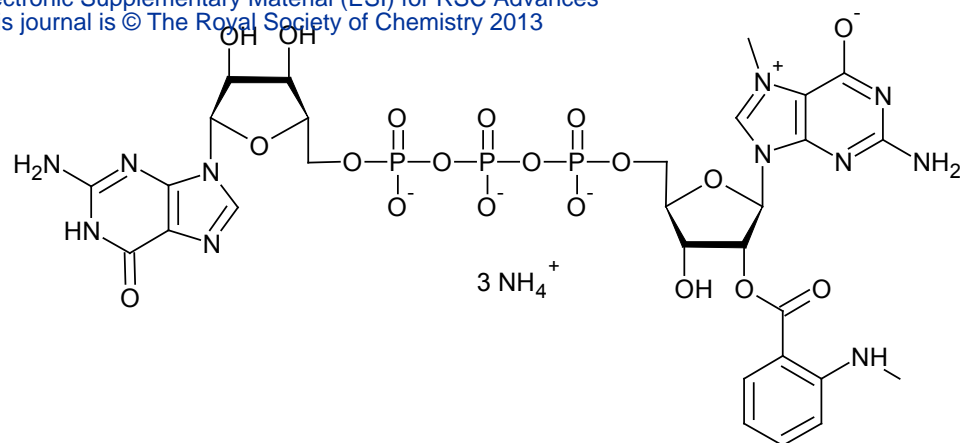

# Mant-m<sup>7</sup>GpppG

**Ziemiak *et al.***  
Synthesis and evaluation of fluorescent  
cap analogues for mRNA labelling  
**supplementary information**

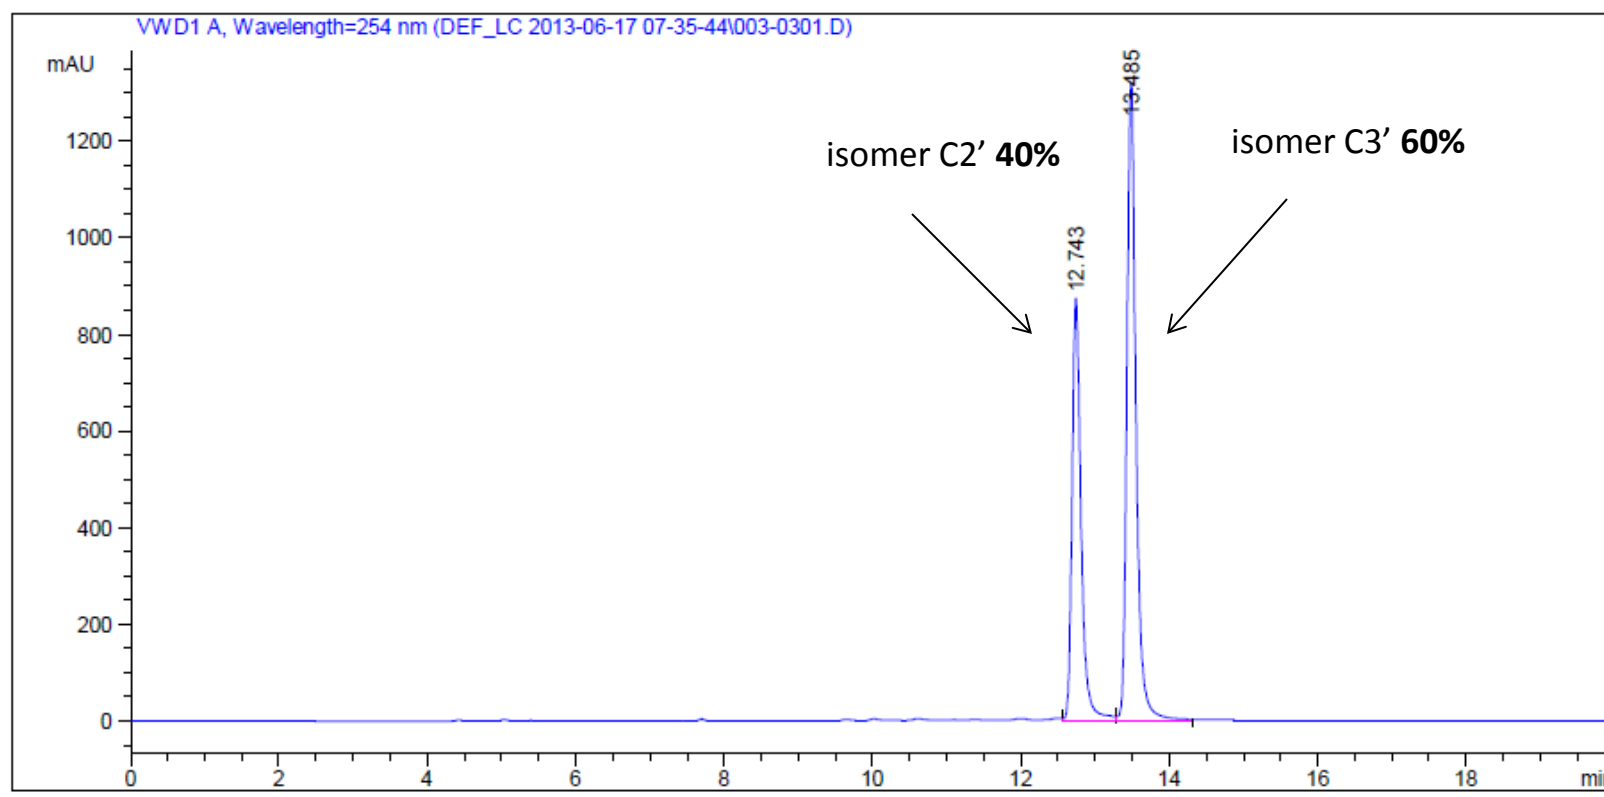

HPLC profile

# Mant-m<sup>7</sup>GpppG

**Ziemniak *et al.***  
Synthesis and evaluation of fluorescent  
cap analogues for mRNA labelling  
**supplementary information**

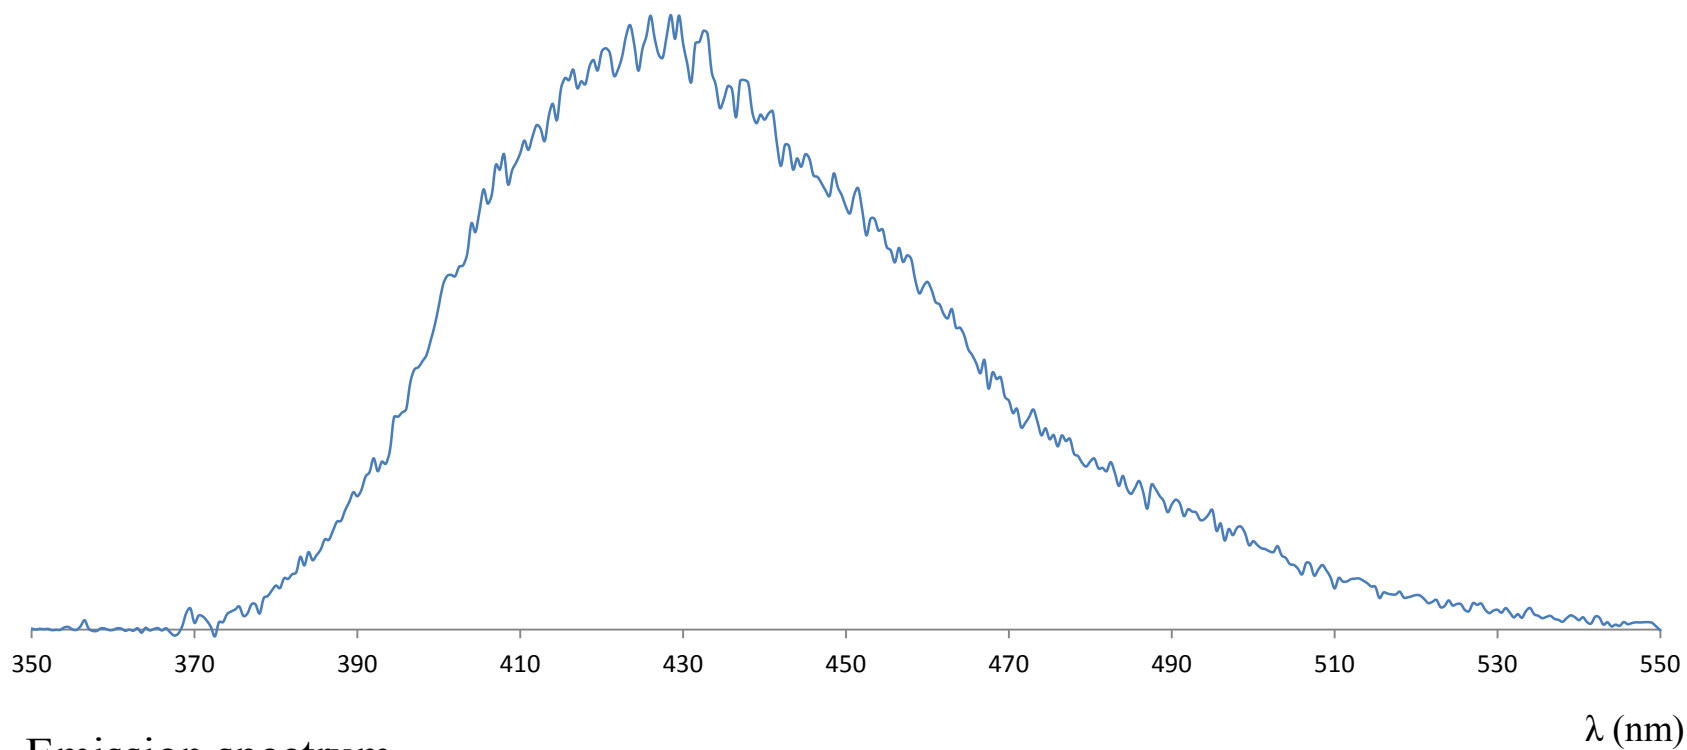

Emission spectrum

λ (nm)



# Mant-m<sup>7</sup>GpppG

**Ziemniak *et al.***  
Synthesis and evaluation of fluorescent  
cap analogues for mRNA labelling  
**supplementary information**

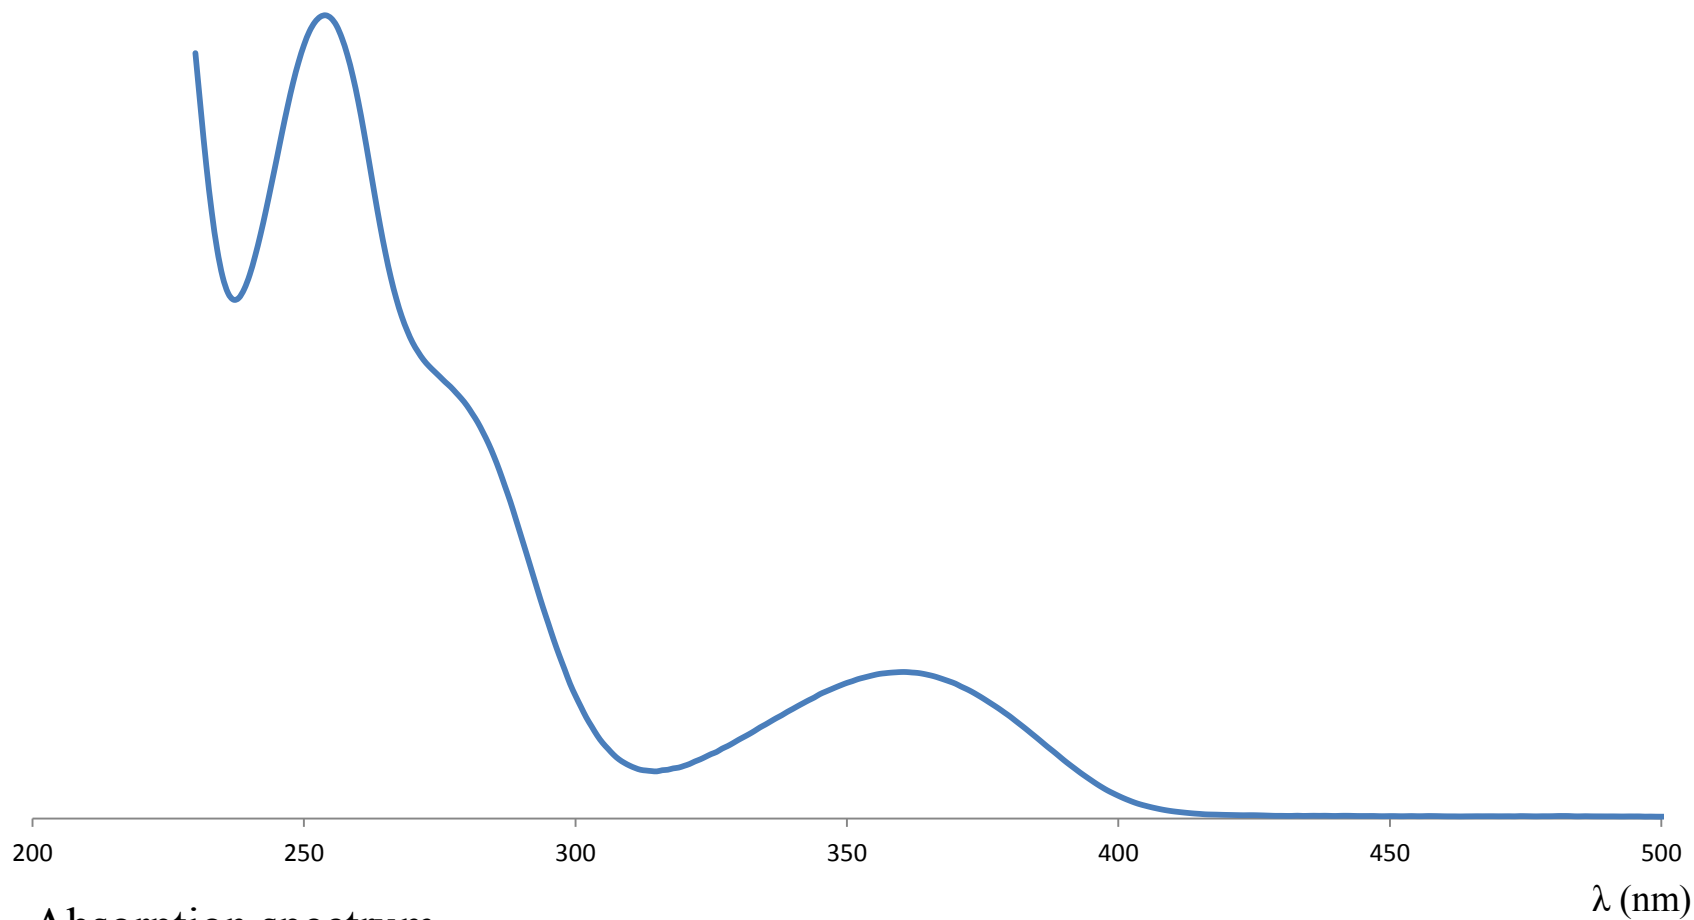

Absorption spectrum

# Mant-m<sup>7</sup>GpppG

11229mant\_gppp#8-64 RT: 0.14-1.14 AV: 57 NL: 1.44E5  
T: FTMS - p ESI Full ms [300.00-1300.00]

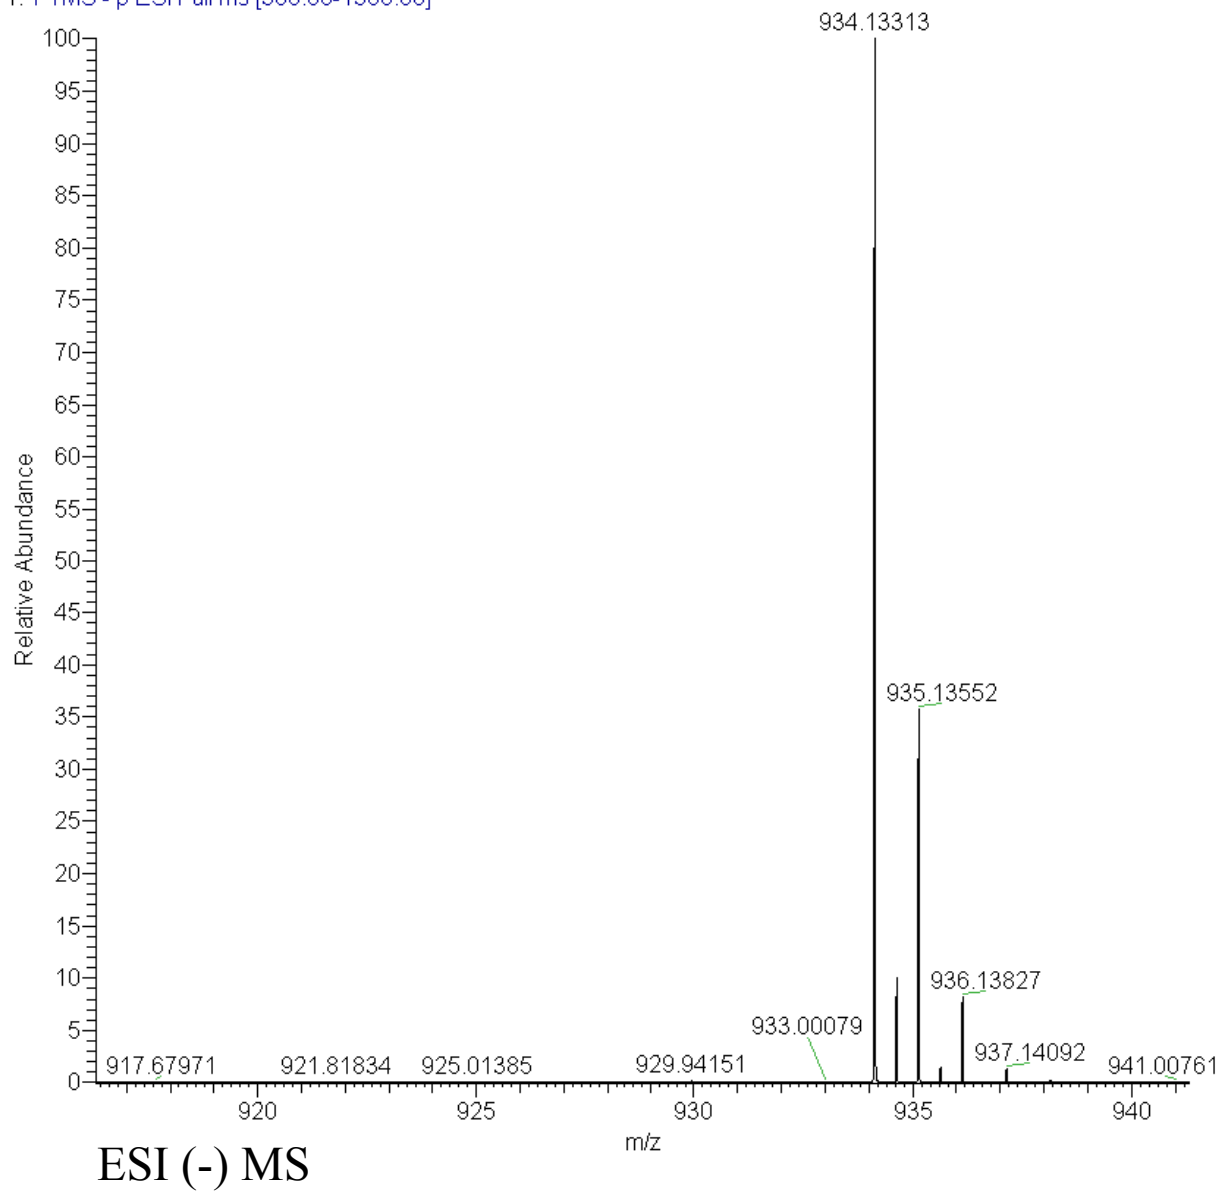

# Mant-m<sup>7</sup>GpppG

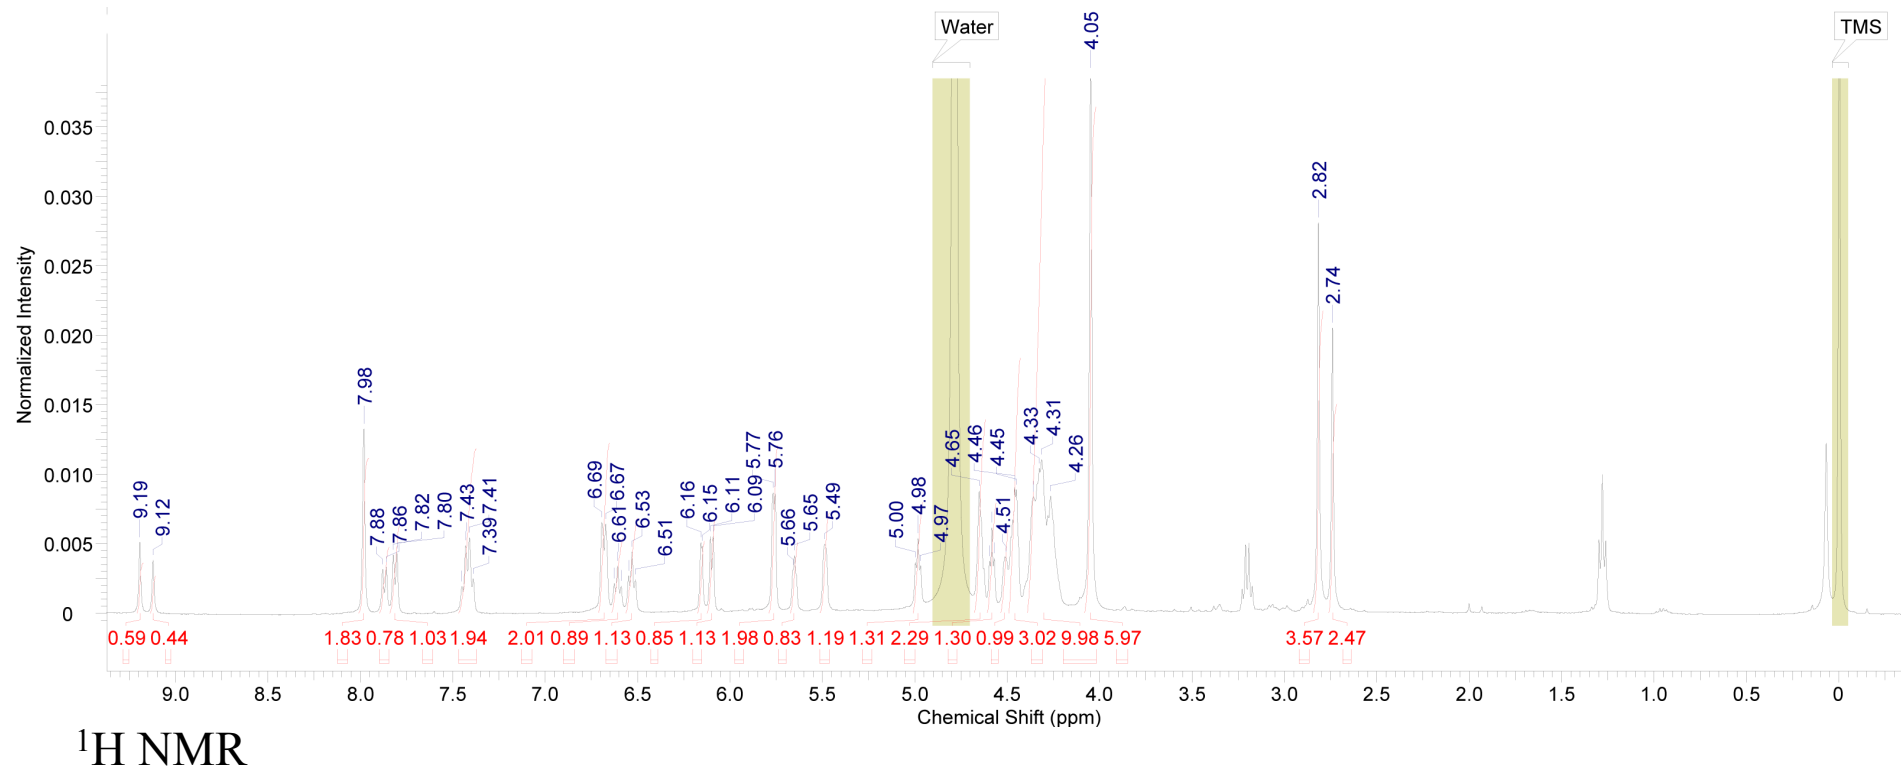

# Mant-m<sup>7</sup>GpppG

**Ziemiak *et al.***  
Synthesis and evaluation of fluorescent  
cap analogues for mRNA labelling  
**supplementary information**

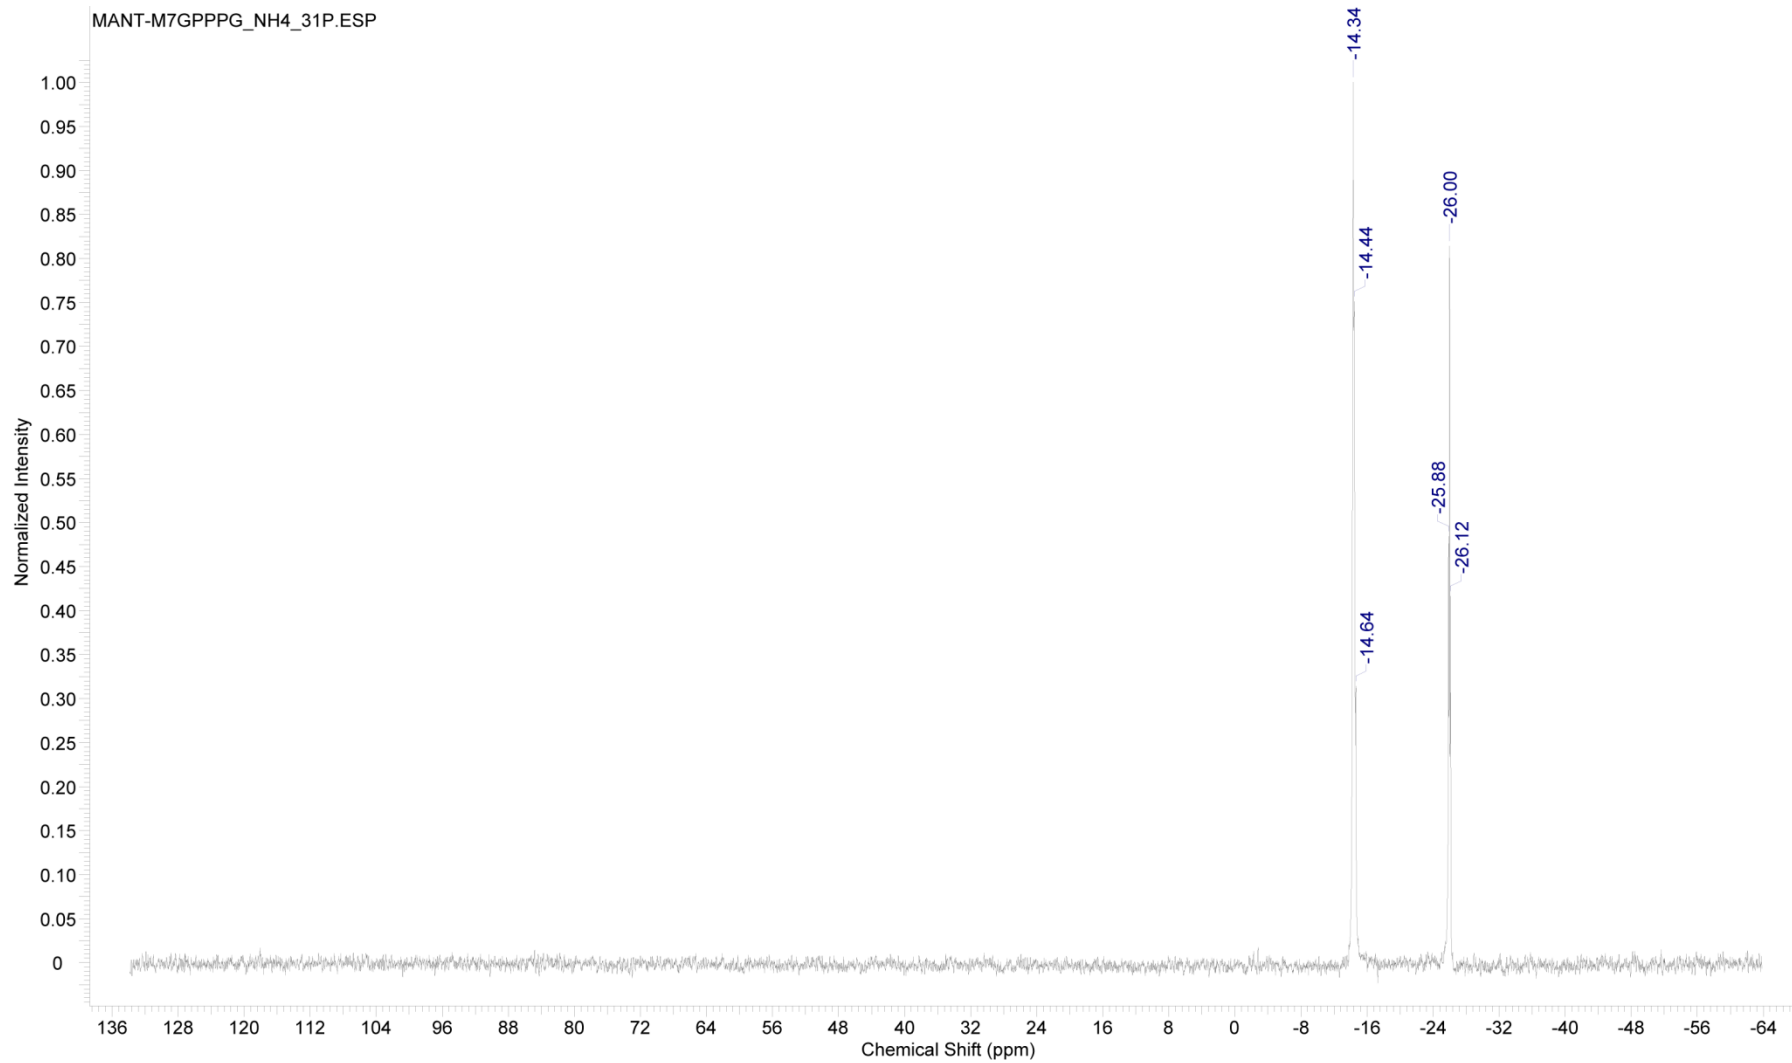

<sup>31</sup>P NMR

# Mant-m<sup>7</sup>GpppG

Mantm7GpppG\_COSY\_D2O\_25deg.fid.esp

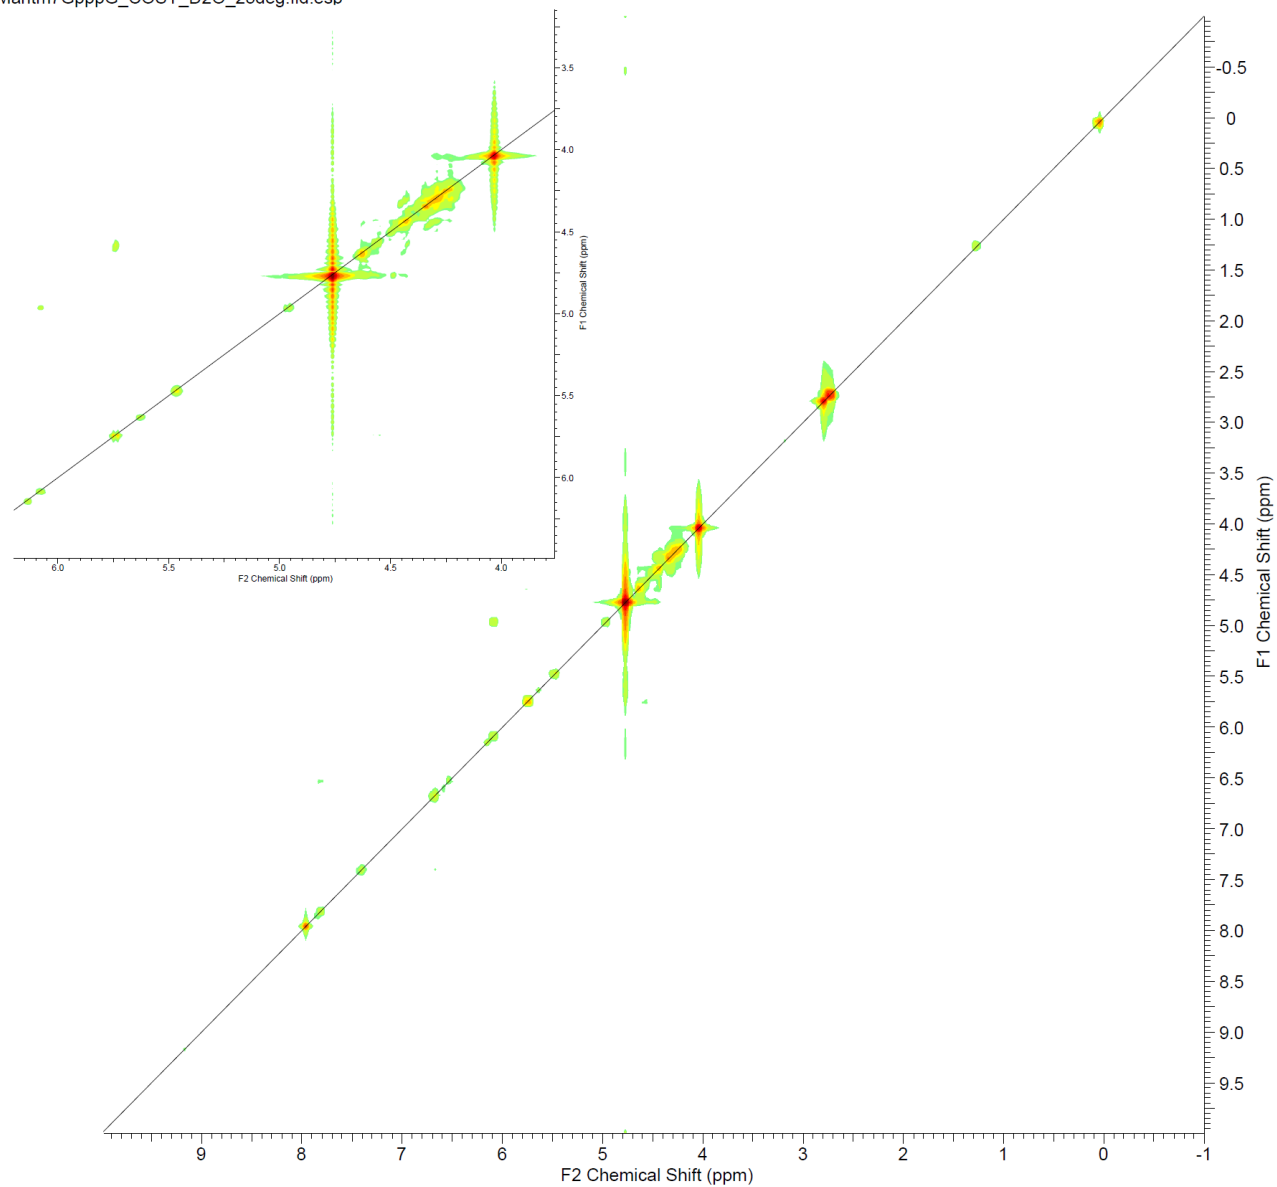

# Mant-m<sup>7</sup>GpCH<sub>2</sub>ppG

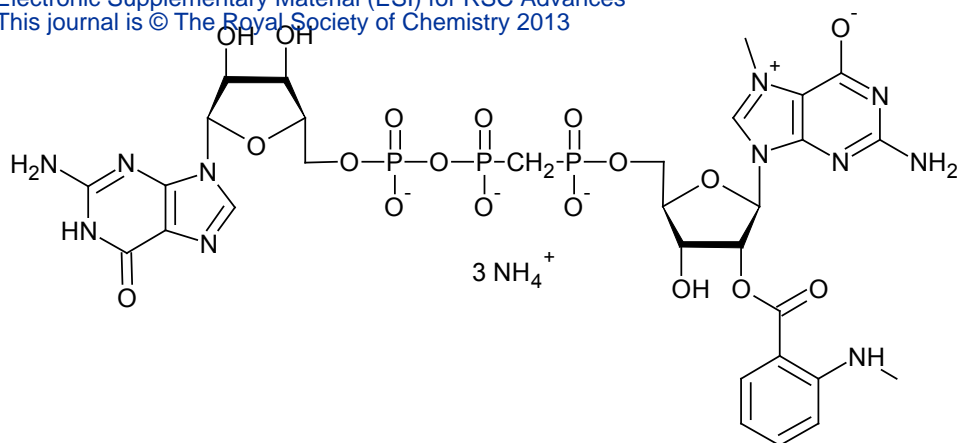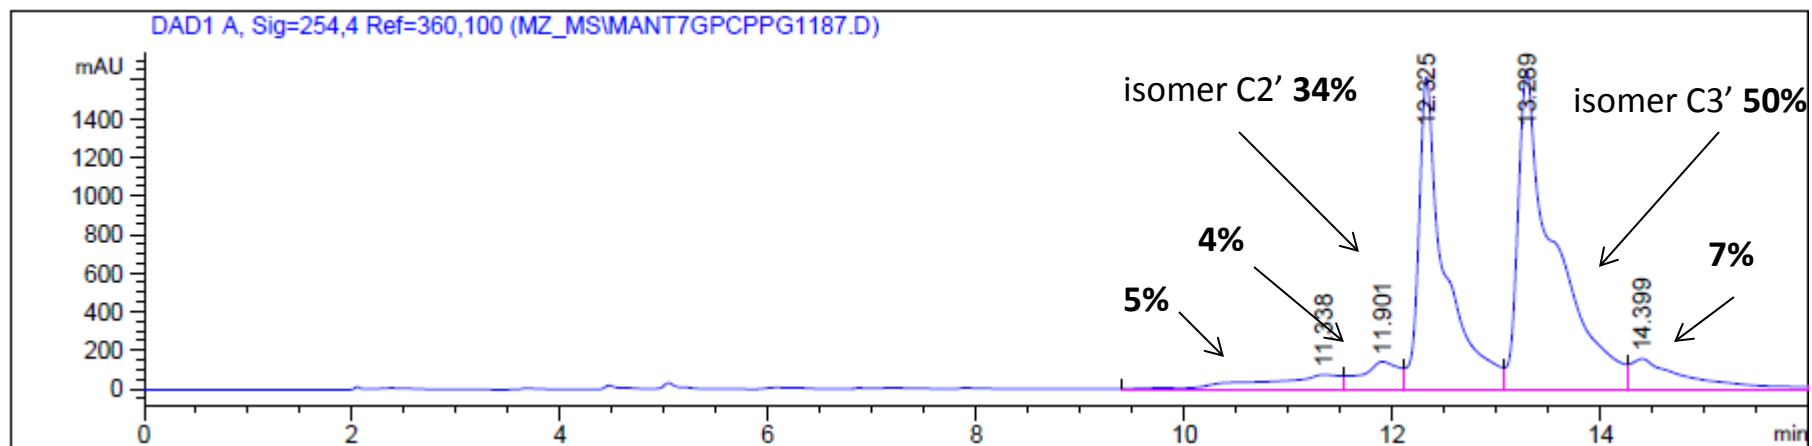

HPLC profile

# Mant-m<sup>7</sup>GpCH<sub>2</sub>ppG

**Ziemniak *et al.***  
Synthesis and evaluation of fluorescent  
cap analogues for mRNA labelling  
**supplementary information**

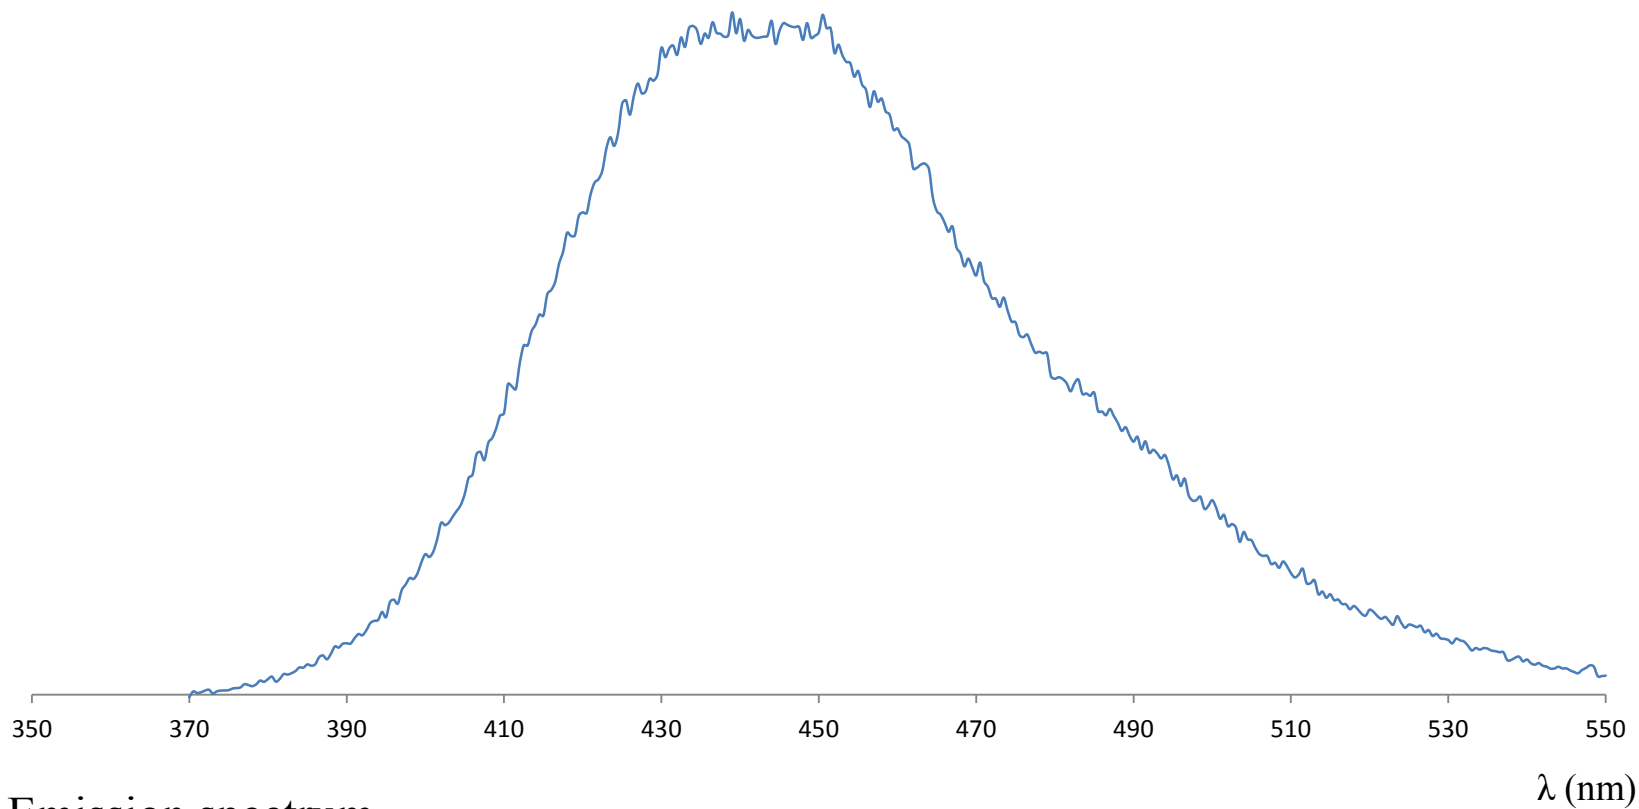

Emission spectrum

λ (nm)

# Mant-m<sup>7</sup>GpCH<sub>2</sub>ppG

**Ziemniak *et al.***  
Synthesis and evaluation of fluorescent  
cap analogues for mRNA labelling  
**supplementary information**

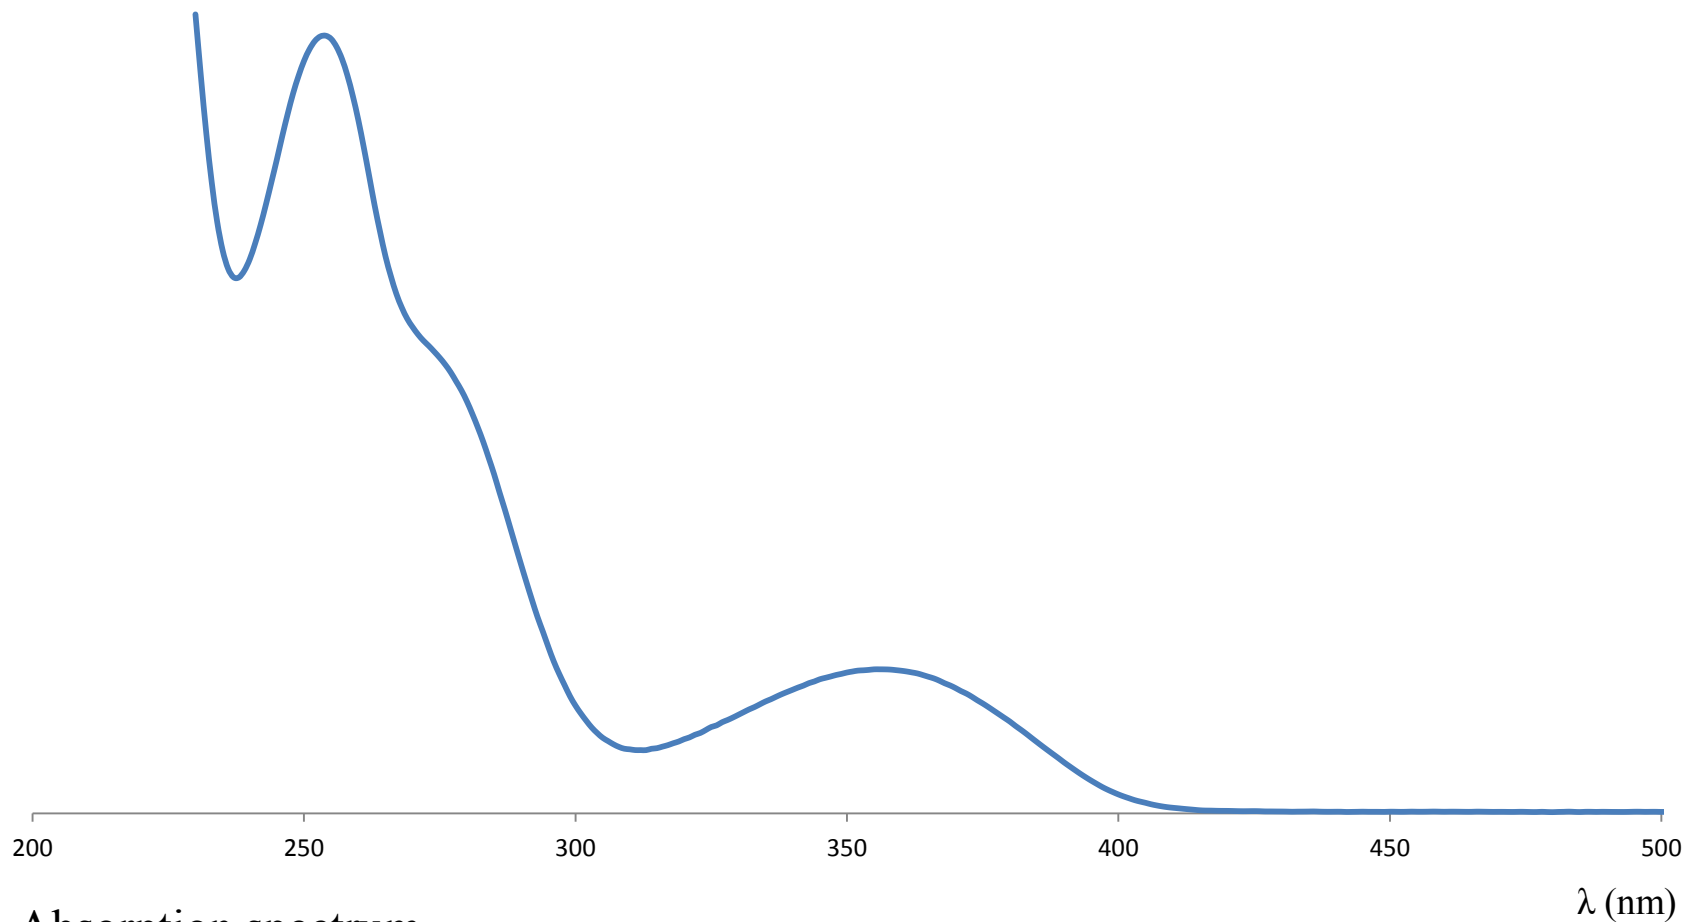

Absorption spectrum

λ (nm)



# Mant-m<sup>7</sup>GpCH<sub>2</sub>ppG

11229mant\_gpch2pp #24-62 RT: 0.42-1.10 AV: 39 NL: 2.30E4  
T: FTMS - p ESI Full ms [300.00-1300.00]

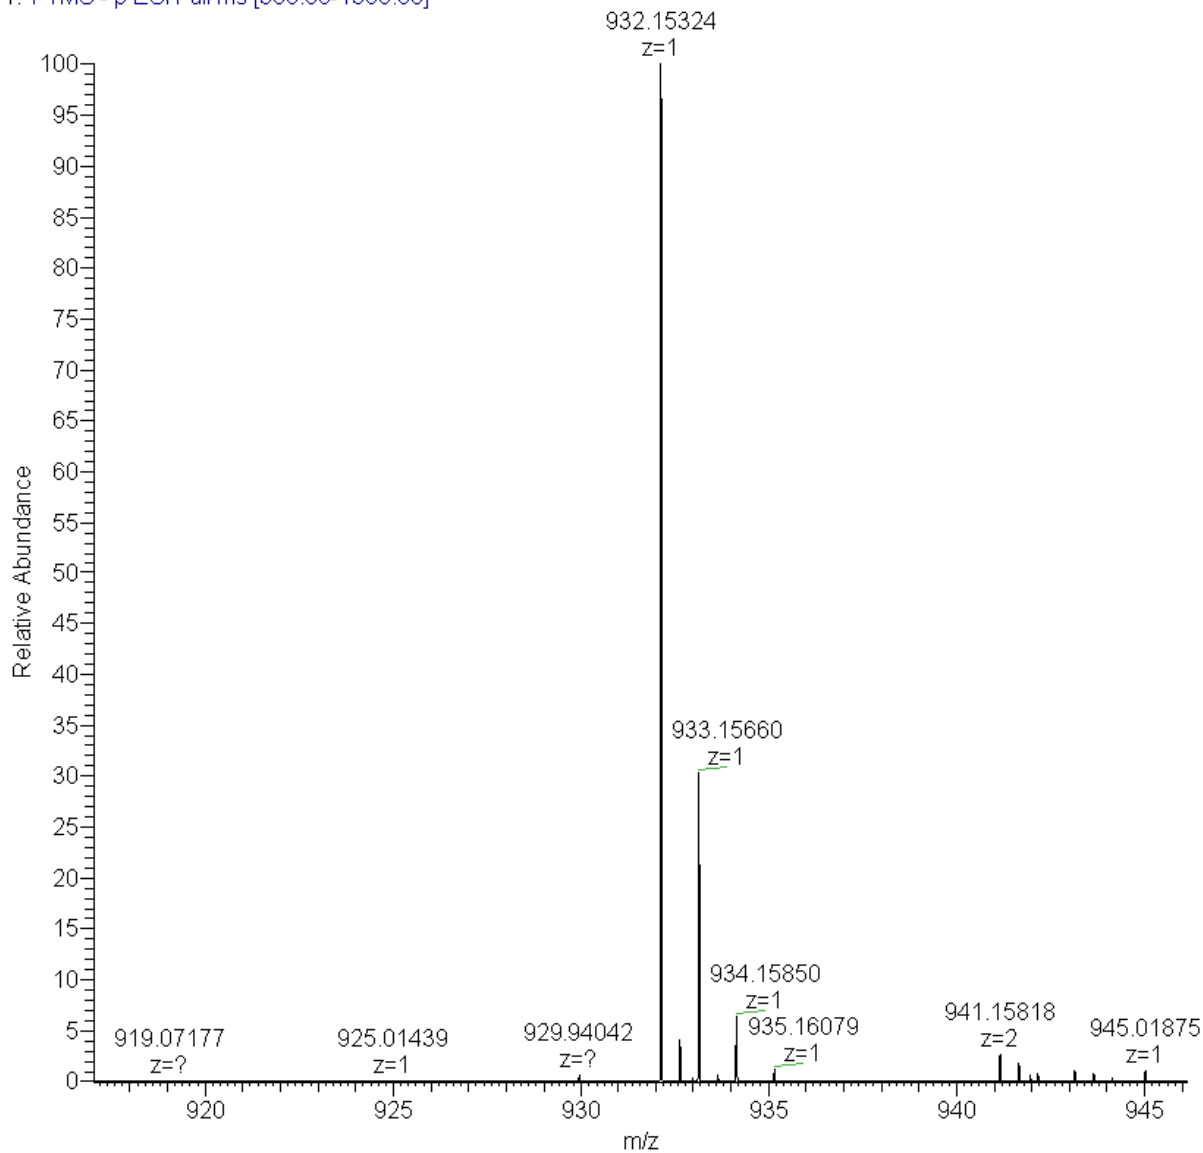

ESI (-) MS

# Mant-m<sup>7</sup>GpCH<sub>2</sub>ppG

**Ziemiak *et al.***  
Synthesis and evaluation of fluorescent  
cap analogues for mRNA labelling  
**supplementary information**

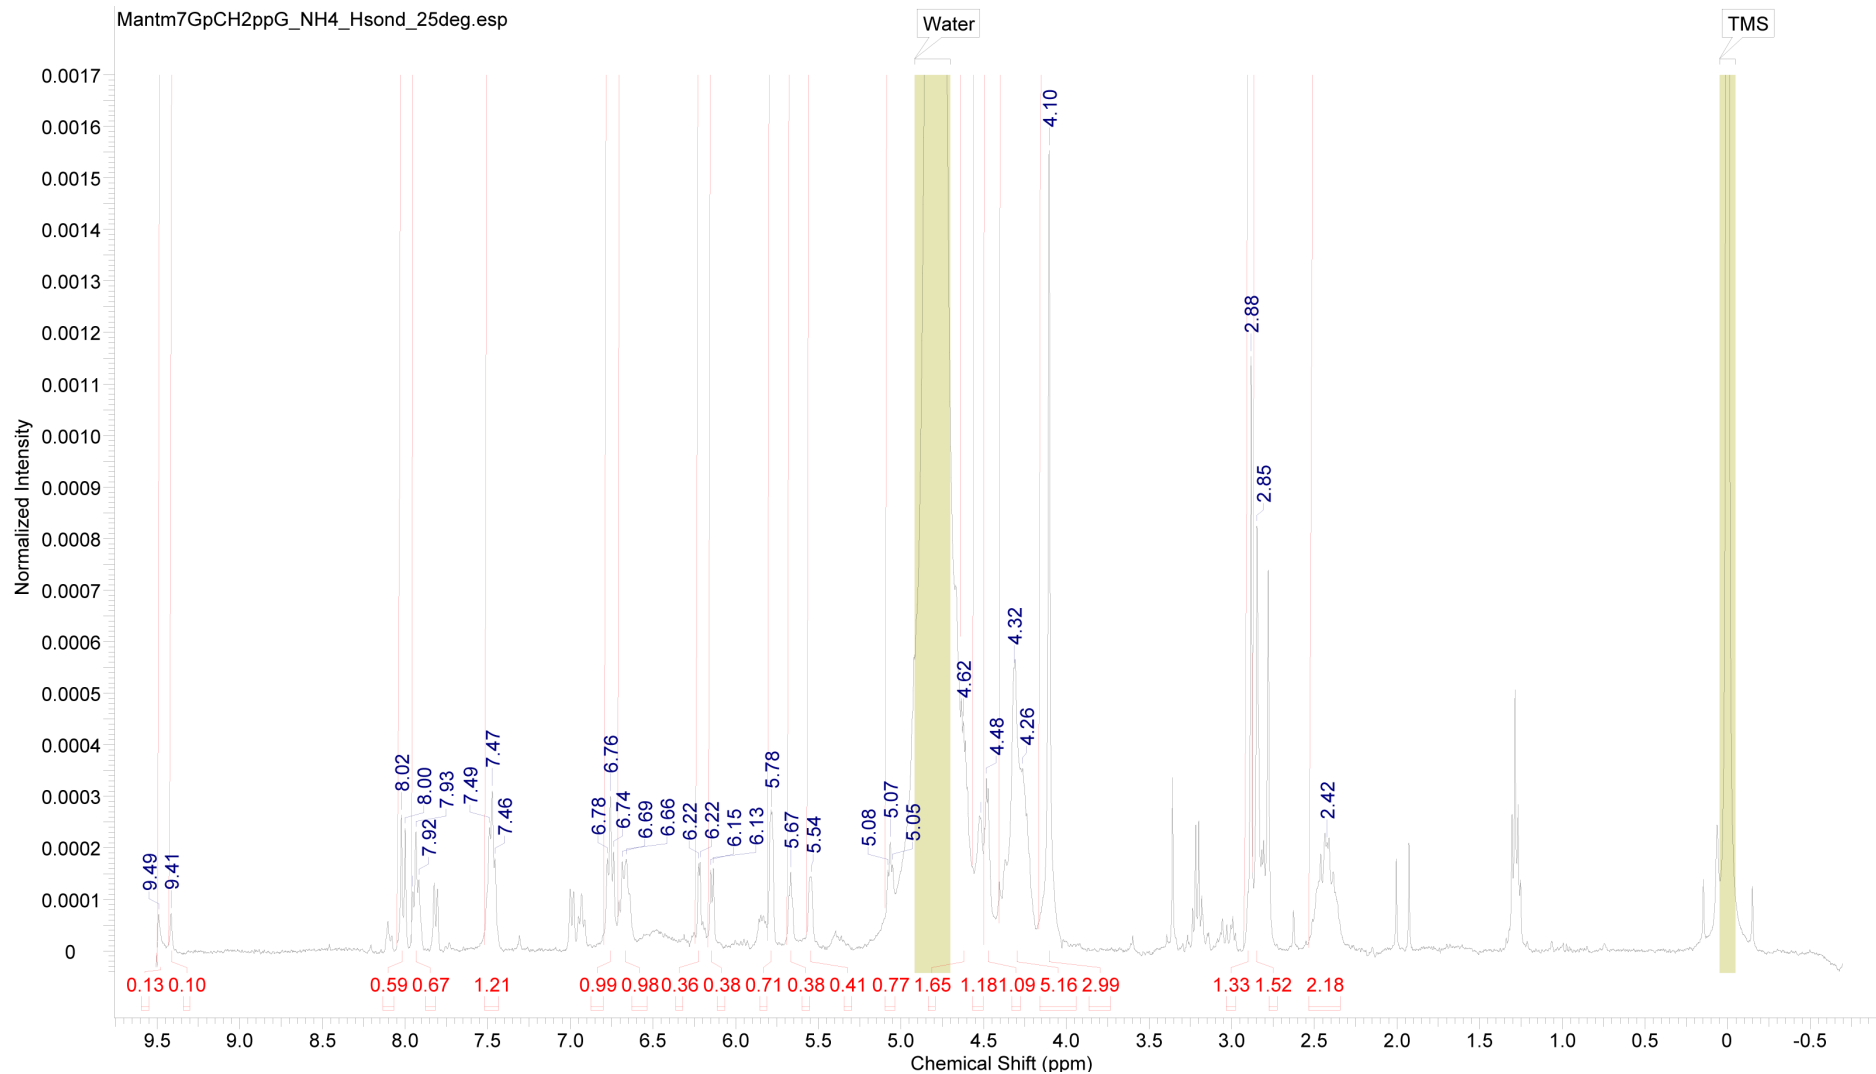

<sup>1</sup>H NMR

# Mant-m<sup>7</sup>GpCH<sub>2</sub>ppG

**Ziemniak *et al.***  
Synthesis and evaluation of fluorescent  
cap analogues for mRNA labelling  
**supplementary information**

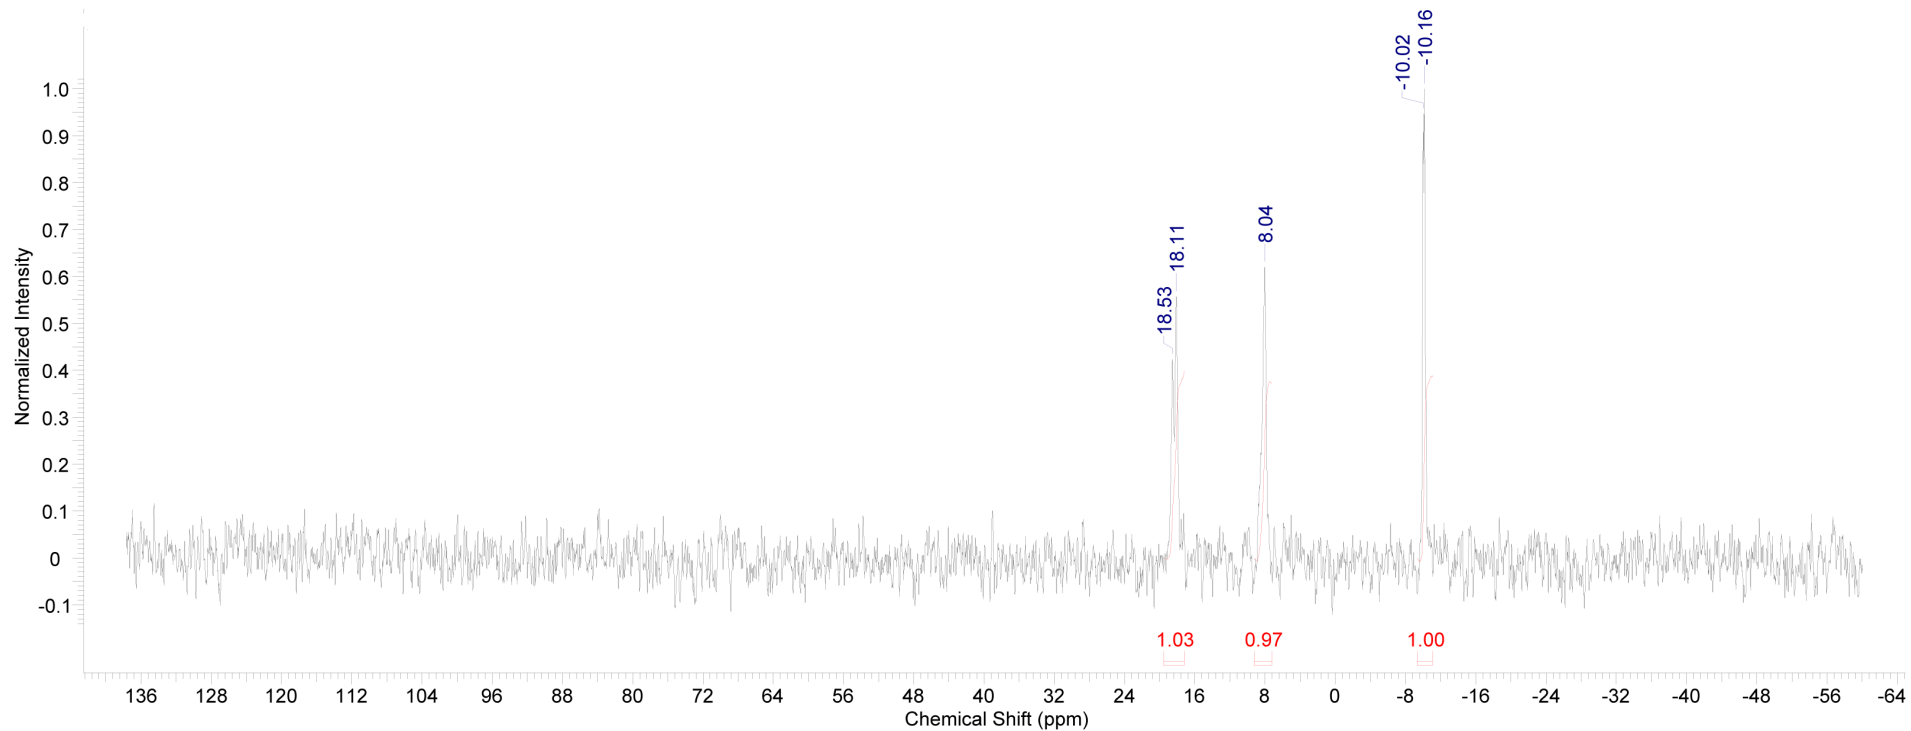

<sup>31</sup>P NMR

# Mant-m<sup>7</sup>GppCH<sub>2</sub>pG

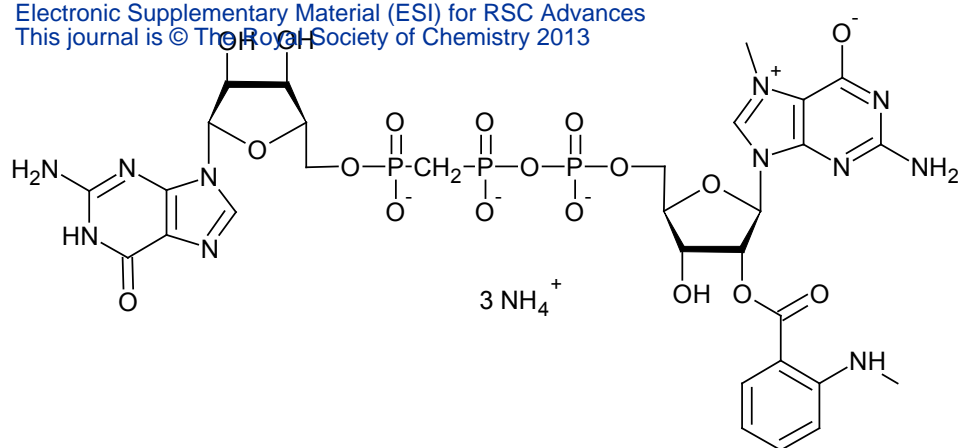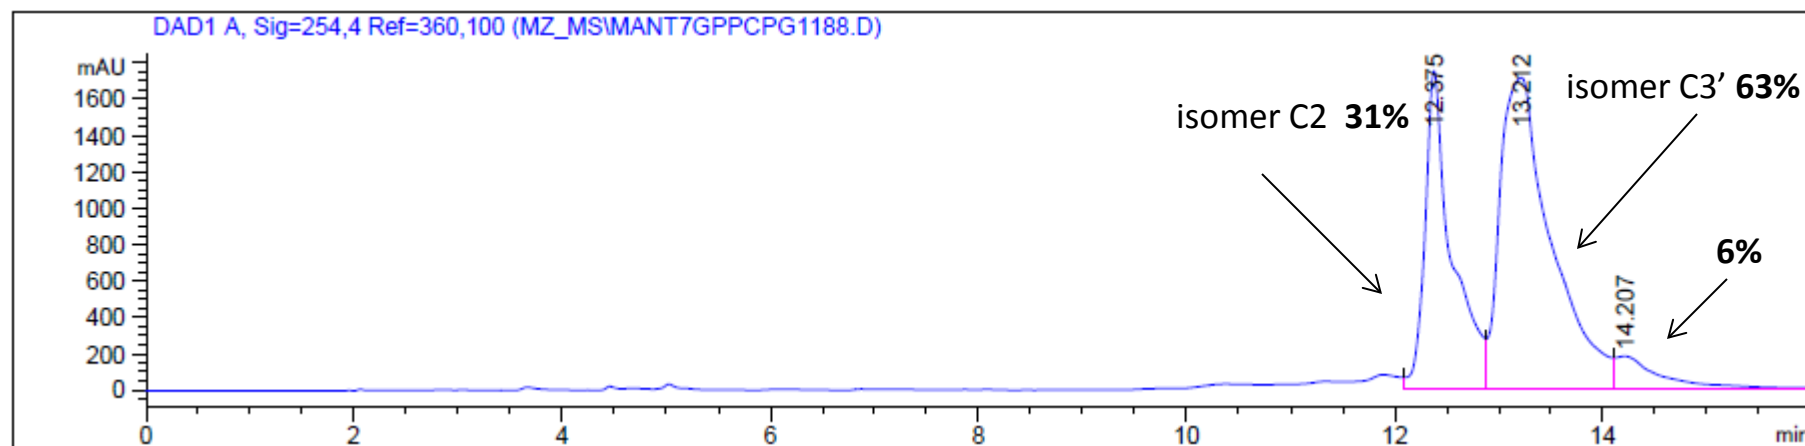

HPLC profile

# Mant-m<sup>7</sup>GppCH<sub>2</sub>pG

**Ziemniak *et al.***  
Synthesis and evaluation of fluorescent  
cap analogues for mRNA labelling  
**supplementary information**

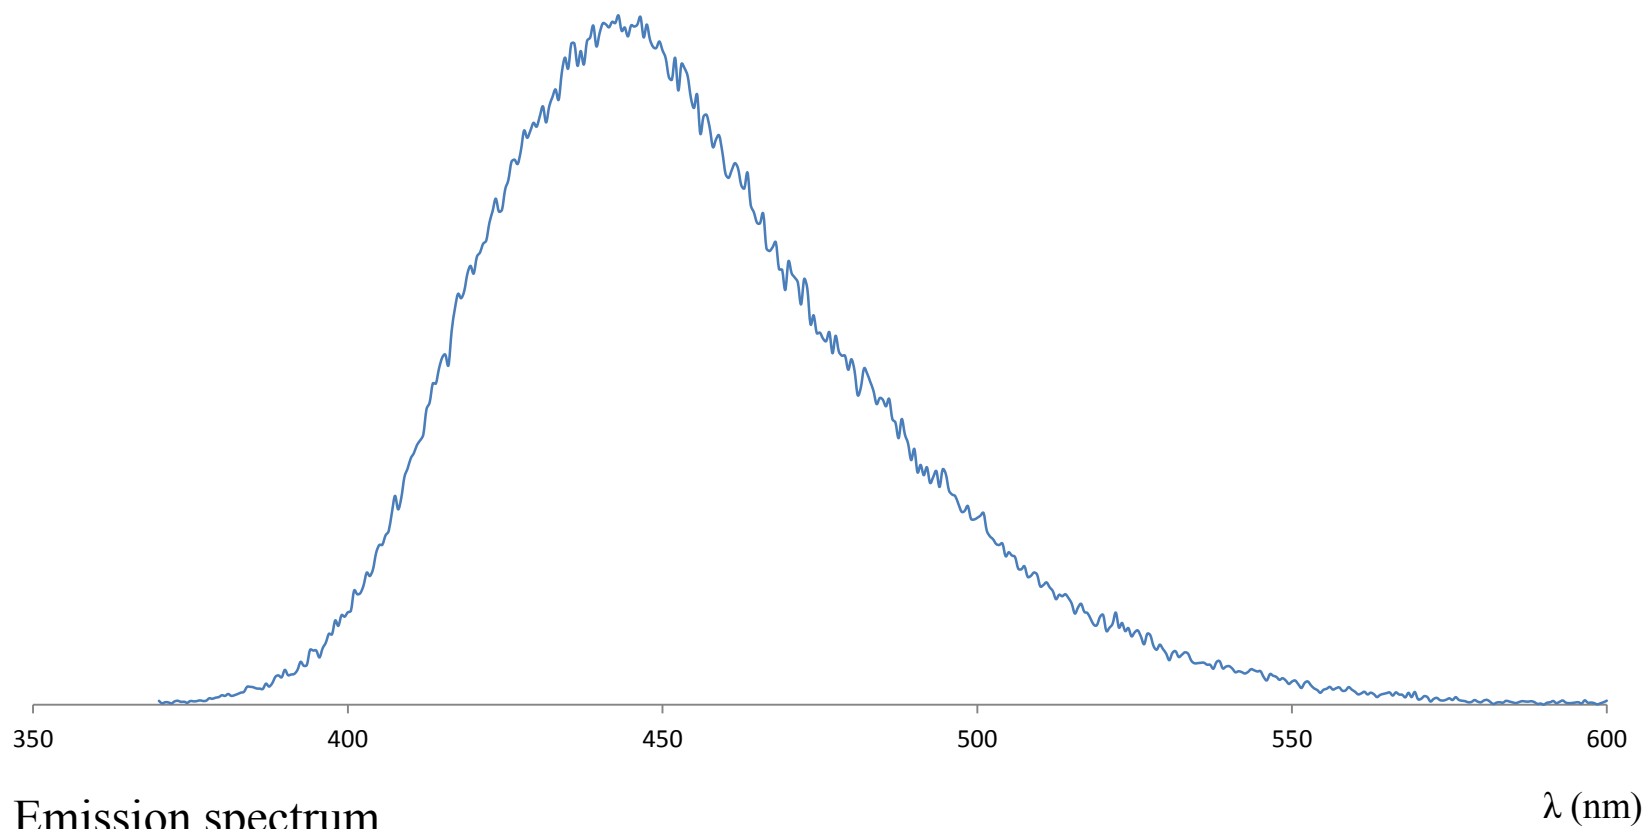

# Mant-m<sup>7</sup>GppCH<sub>2</sub>pG

**Ziemniak *et al.***  
Synthesis and evaluation of fluorescent  
cap analogues for mRNA labelling  
**supplementary information**

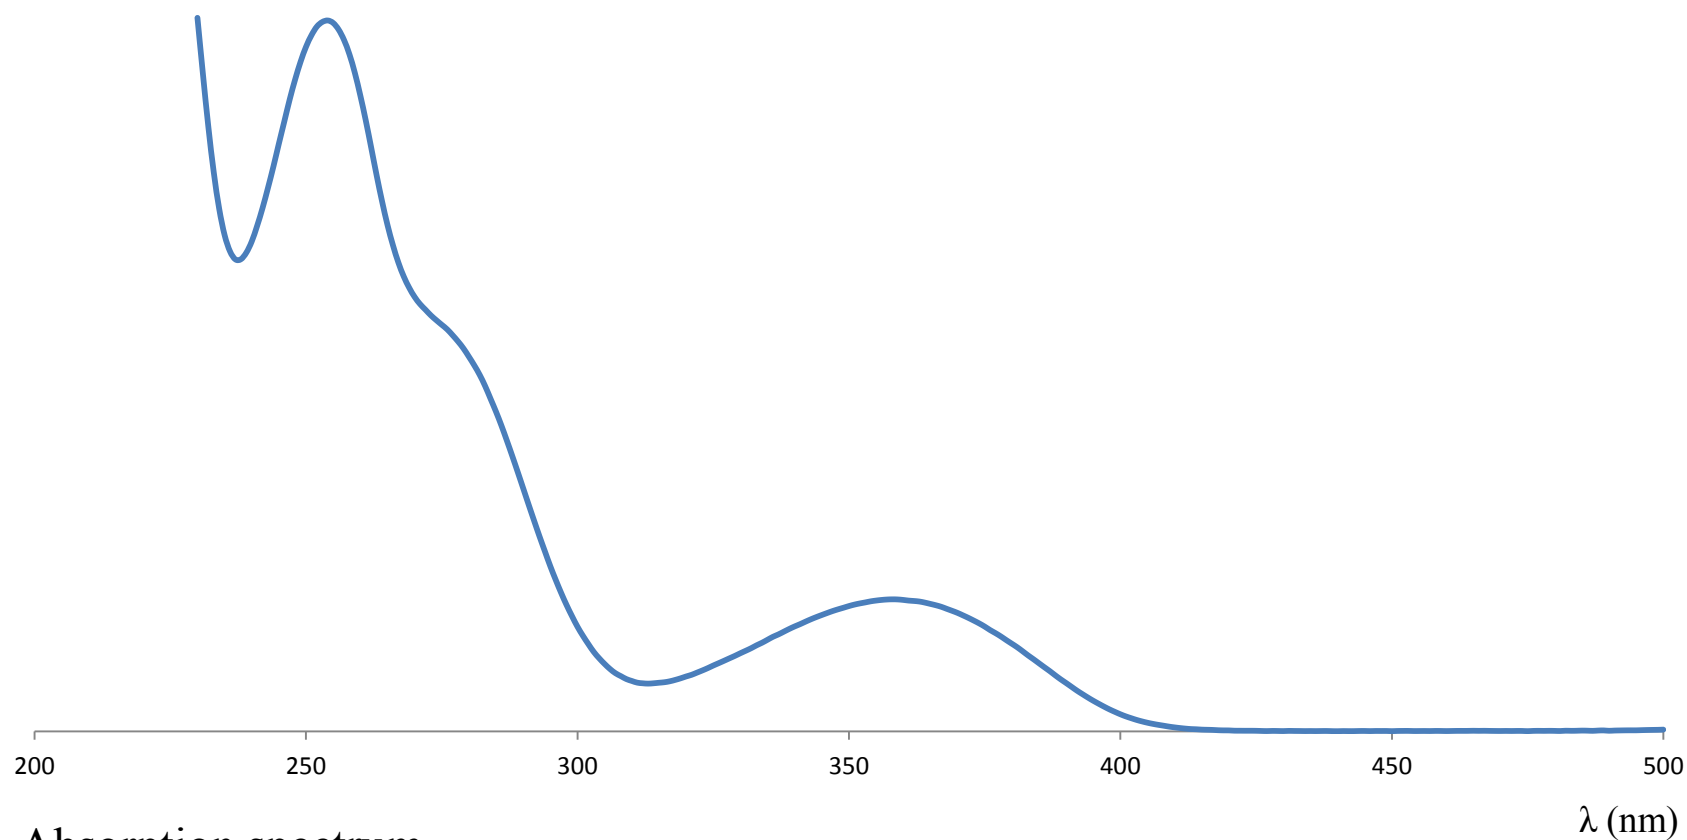

Absorption spectrum

λ (nm)

# Mant-m<sup>7</sup>GppCH<sub>2</sub>pG

11229mant\_gppch2p #22-68 RT: 0.39-1.22 AV: 47 NL: 1.04E5  
T: FTMS - p ESI Full ms [300.00-1300.00]

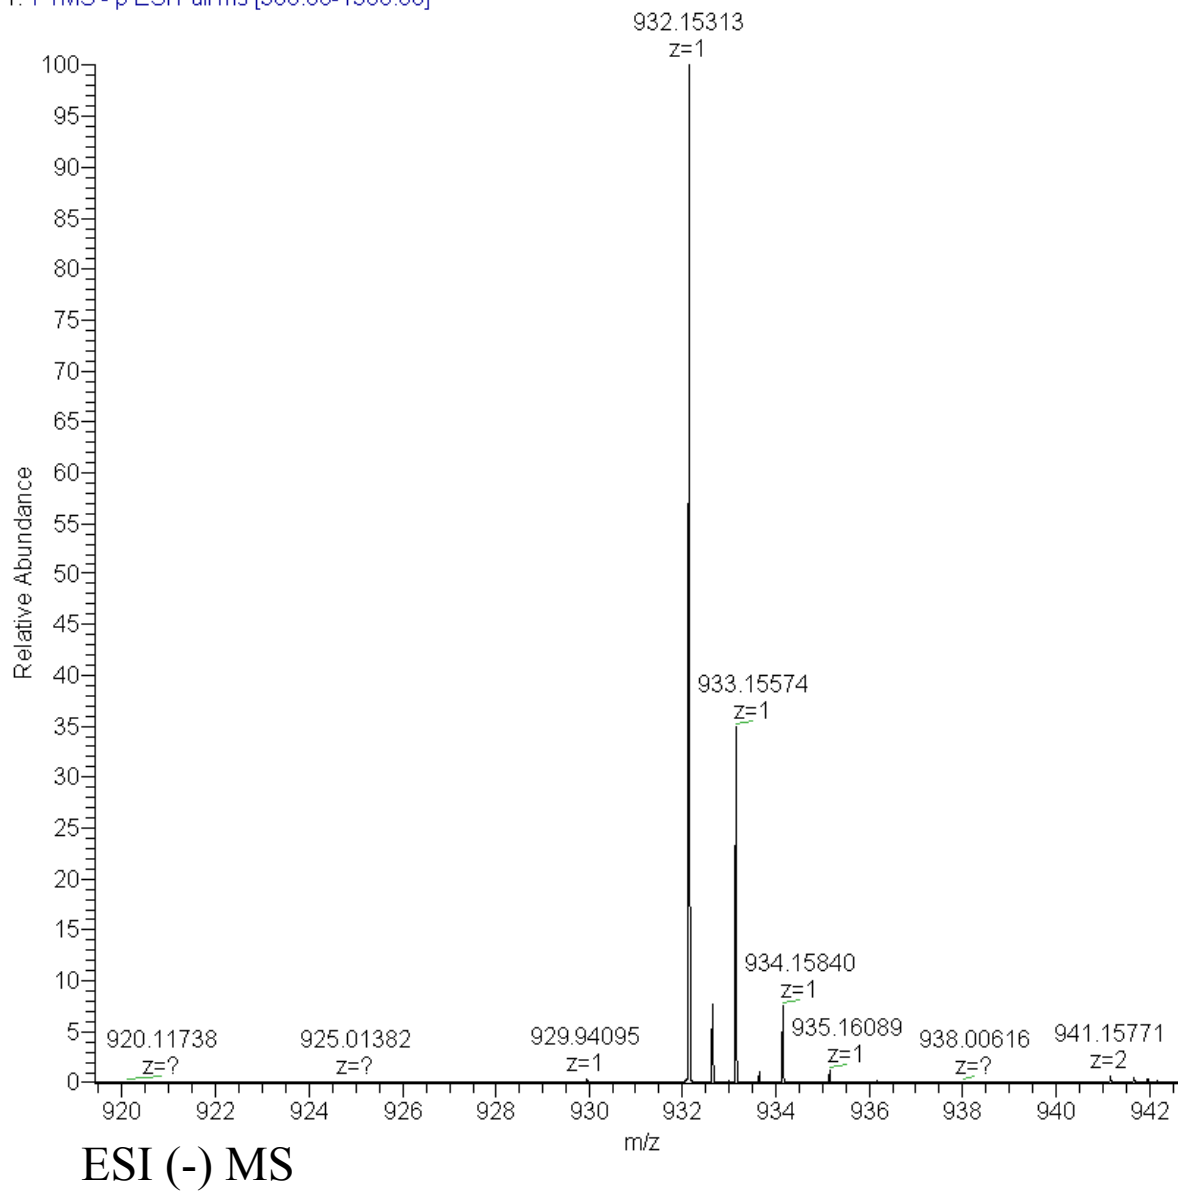

# Mant-m<sup>7</sup>GppCH<sub>2</sub>pG

**Ziemiak *et al.***  
Synthesis and evaluation of fluorescent  
cap analogues for mRNA labelling  
**supplementary information**

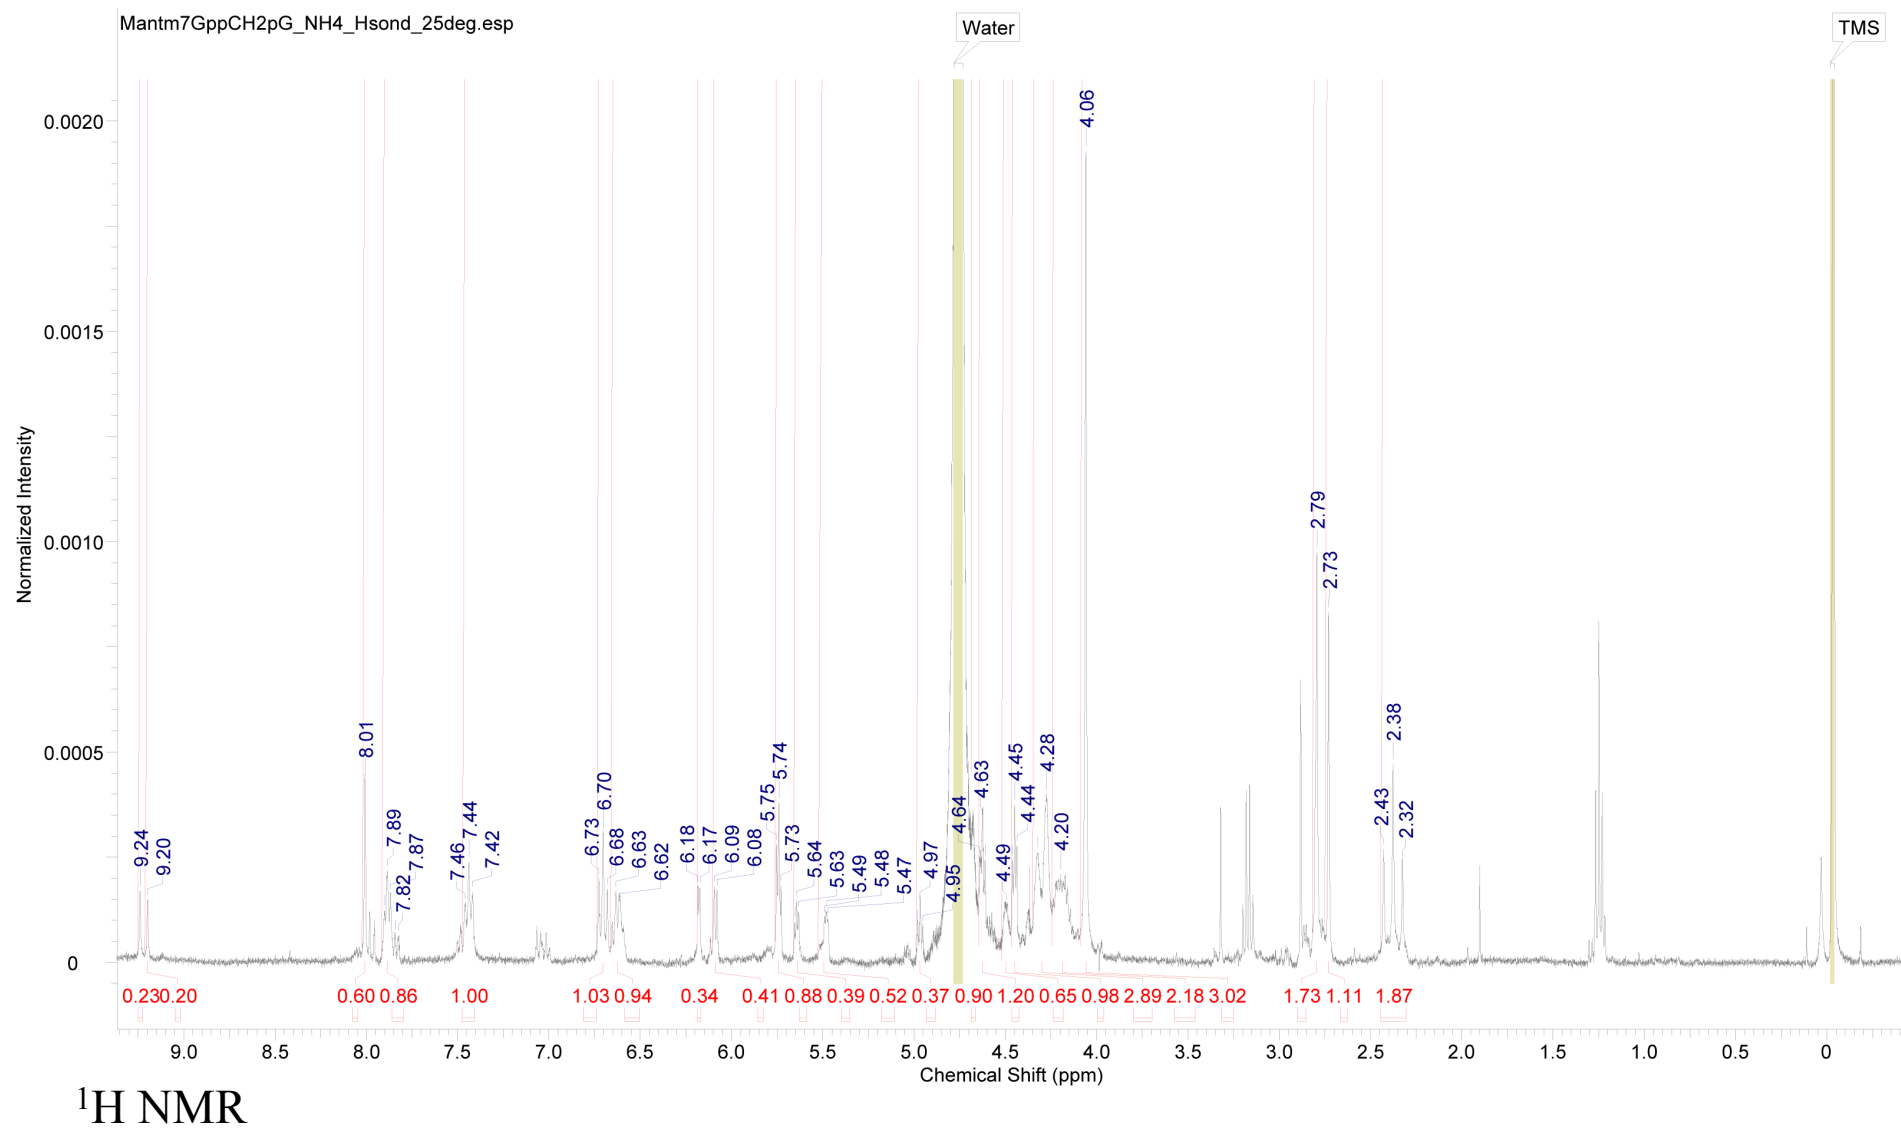



# Mant-m<sup>7</sup>GppCH<sub>2</sub>pG

**Ziemiak *et al.***  
Synthesis and evaluation of fluorescent  
cap analogues for mRNA labelling  
**supplementary information**

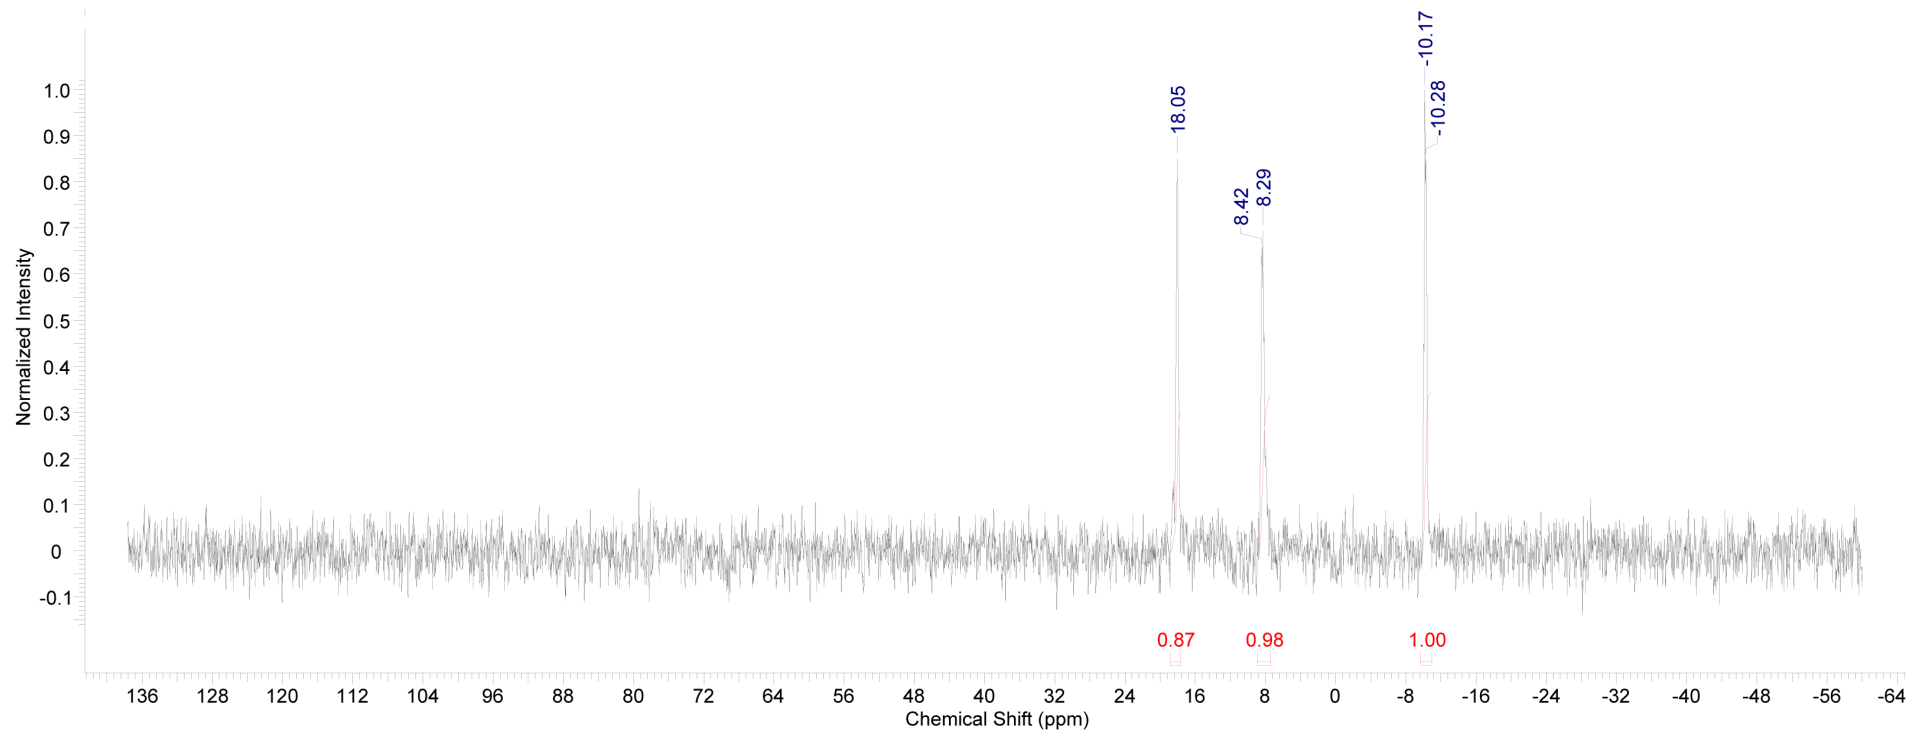

<sup>31</sup>P NMR

# Ant-m<sub>2</sub><sup>7,2'-O</sup>GpppG

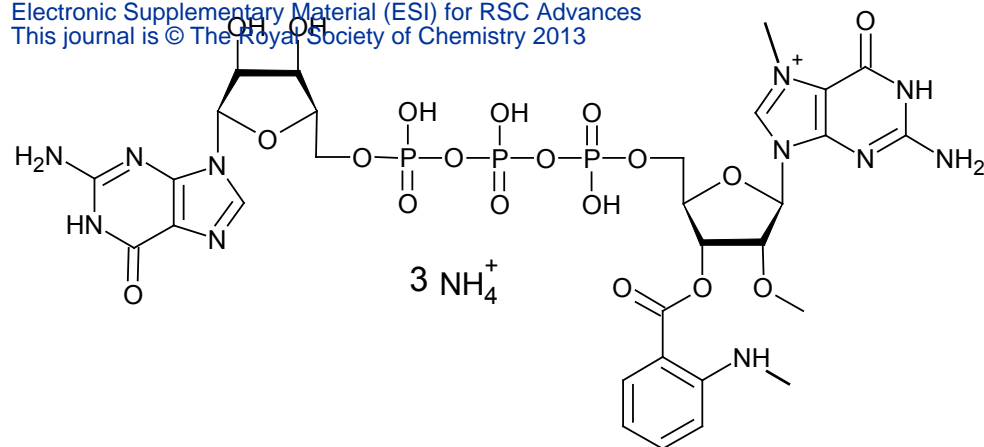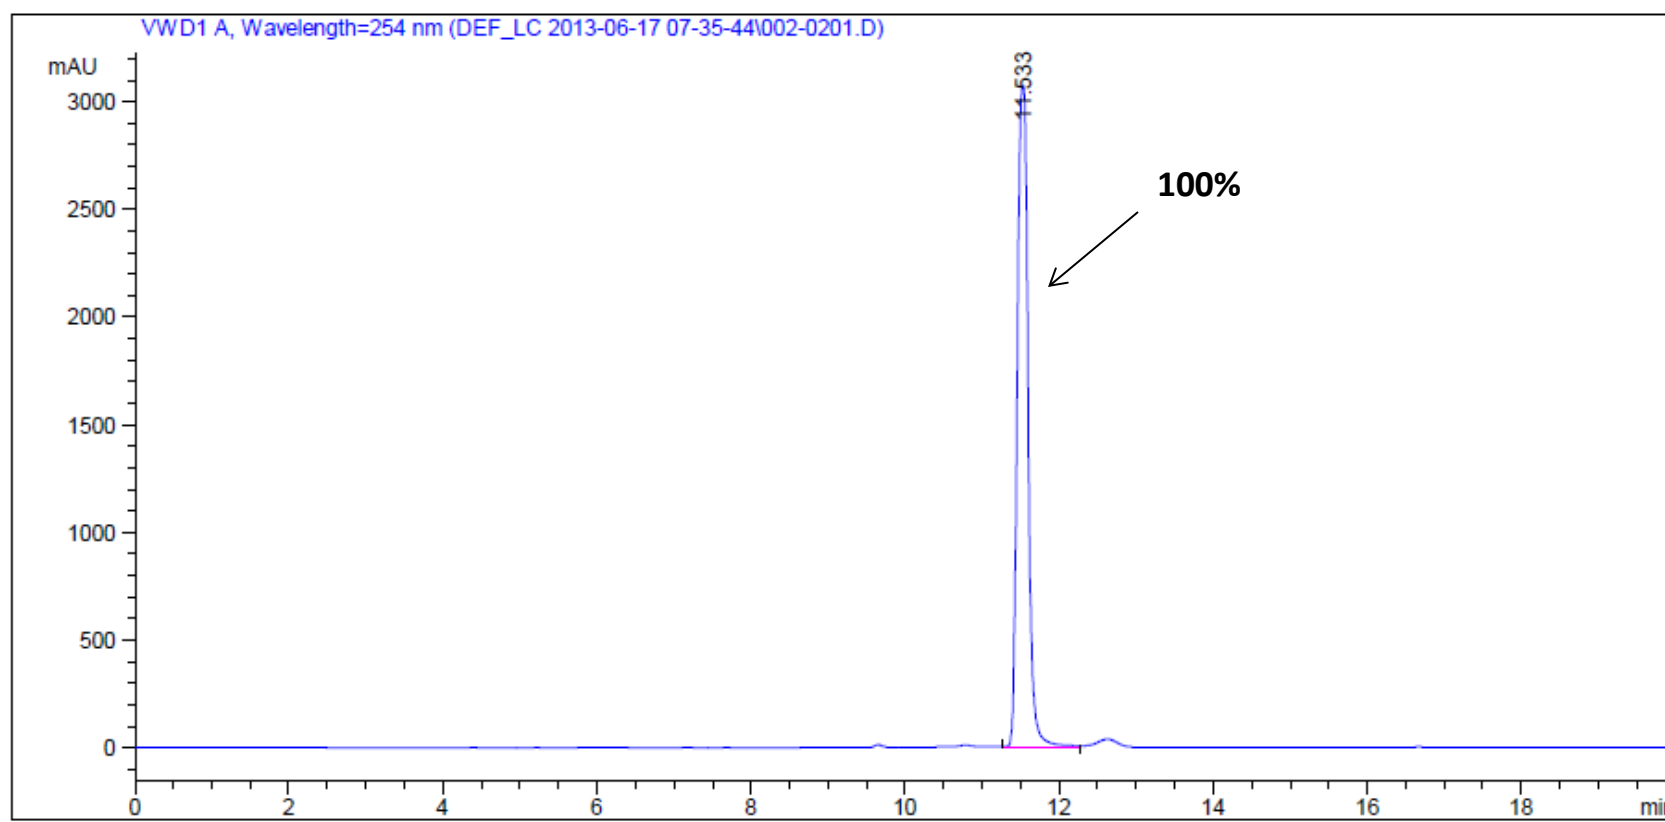

HPLC profile

# Ant-m<sub>2</sub><sup>7,2'-O</sup>GpppG

**Ziemniak *et al.***  
Synthesis and evaluation of fluorescent  
cap analogues for mRNA labelling  
**supplementary information**

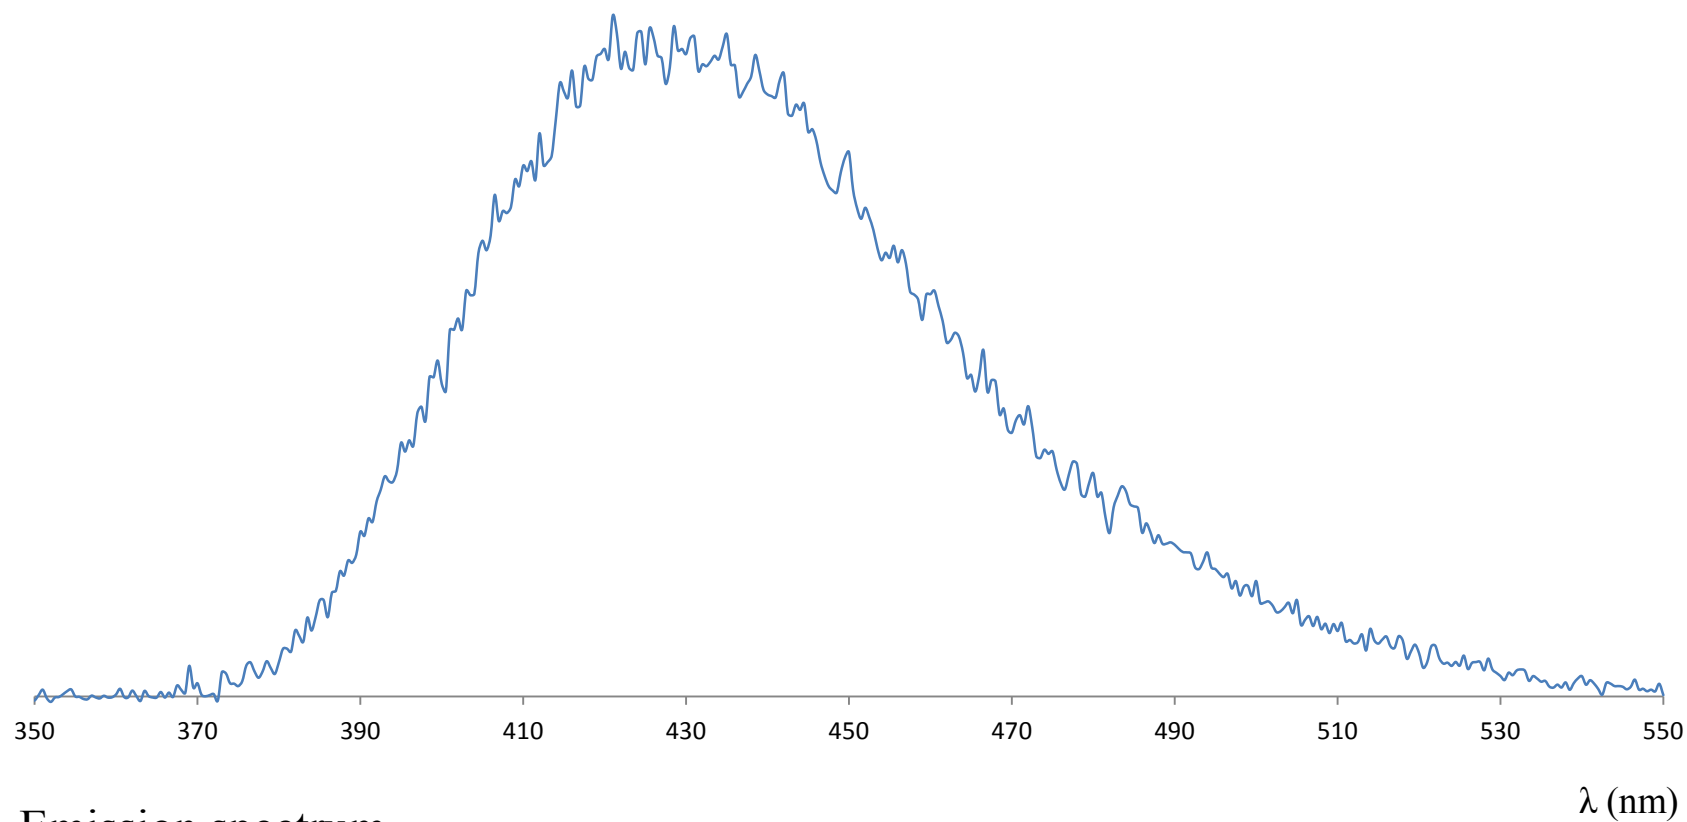

Emission spectrum

λ (nm)

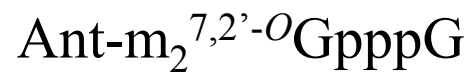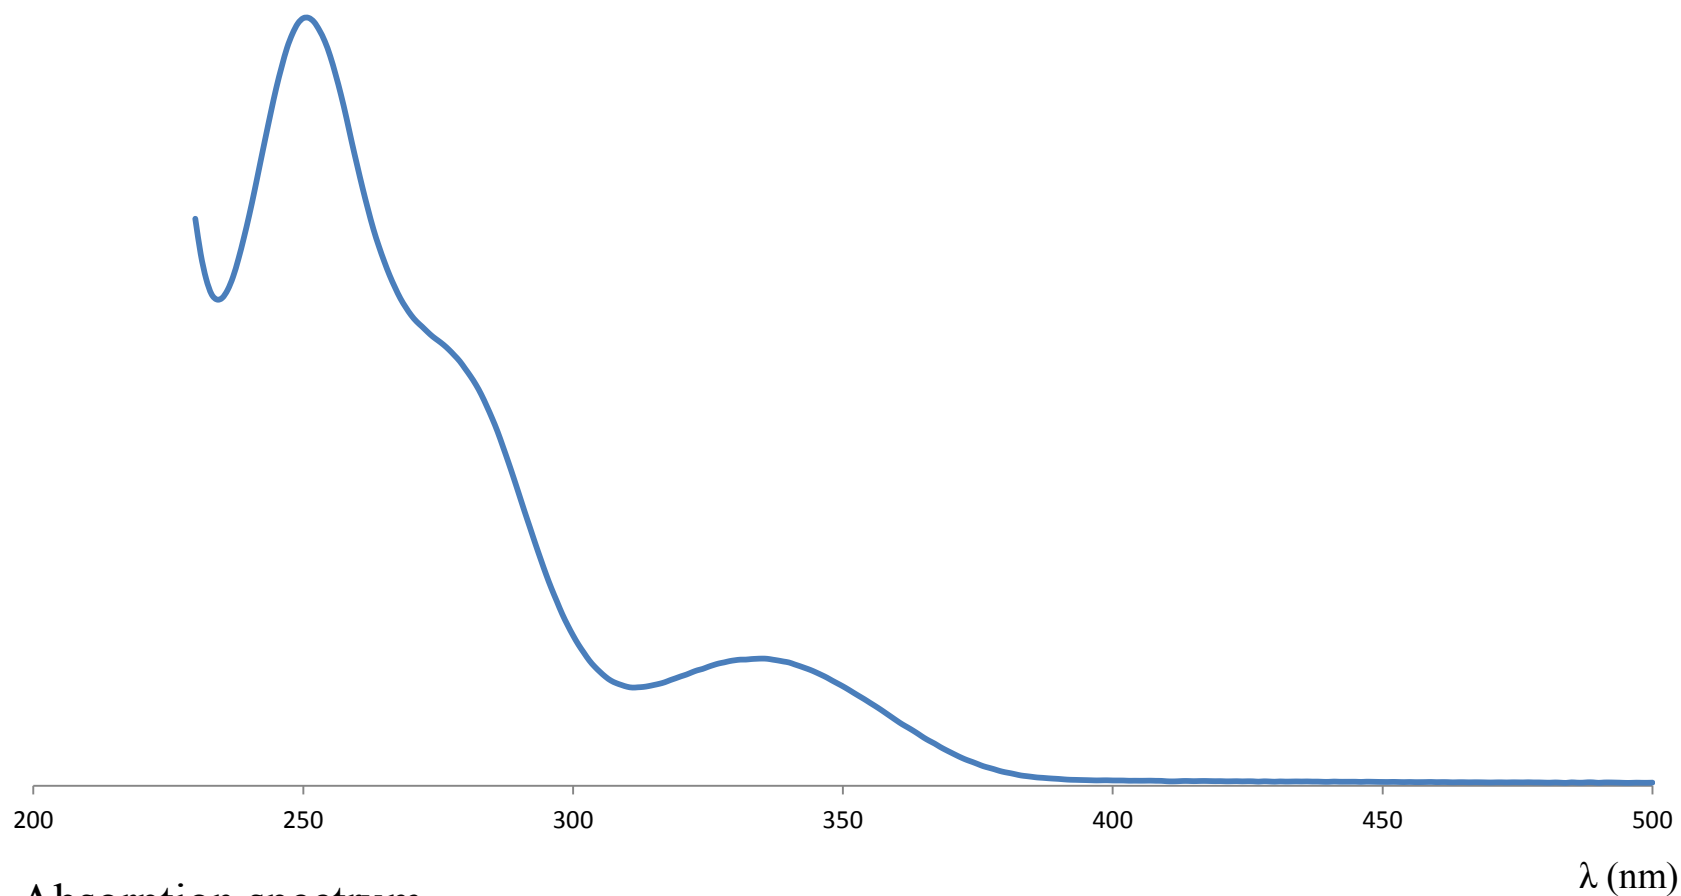

Absorption spectrum

λ (nm)

# Ant- $m_2^{7,2'-O}$ GpppG

11229ant\_27gppp #1-61 RT: 0.01-1.09 AV: 61 NL: 1.03E5  
T: FTMS - p ESI Full ms [300.00-1300.00]

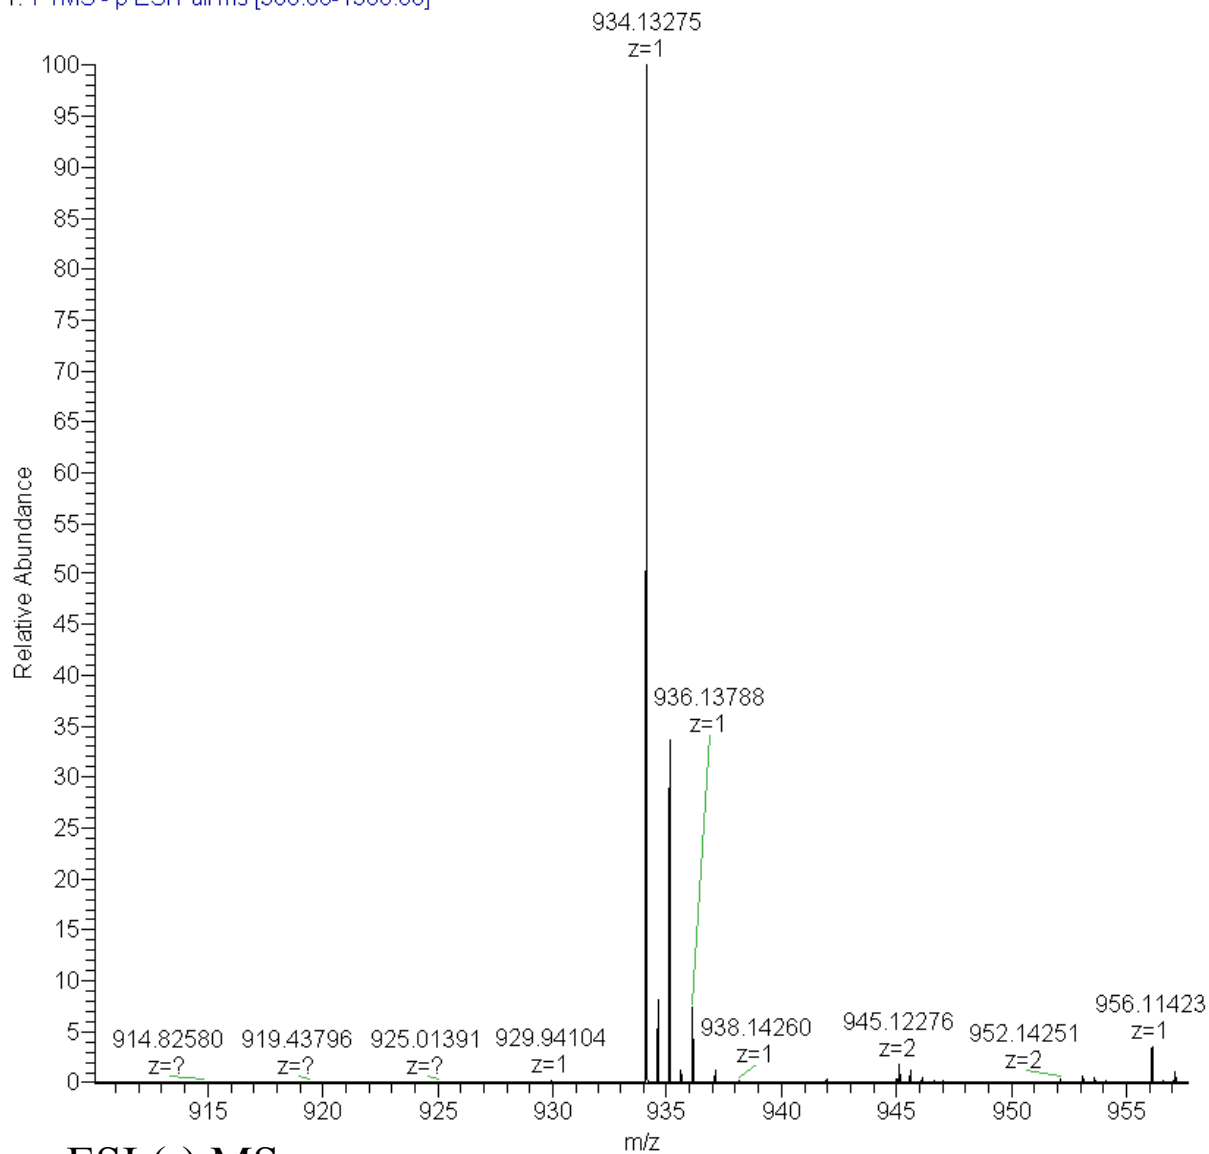

ESI (-) MS

# Ant-m<sub>2</sub><sup>7,2'-O</sup>GpppG

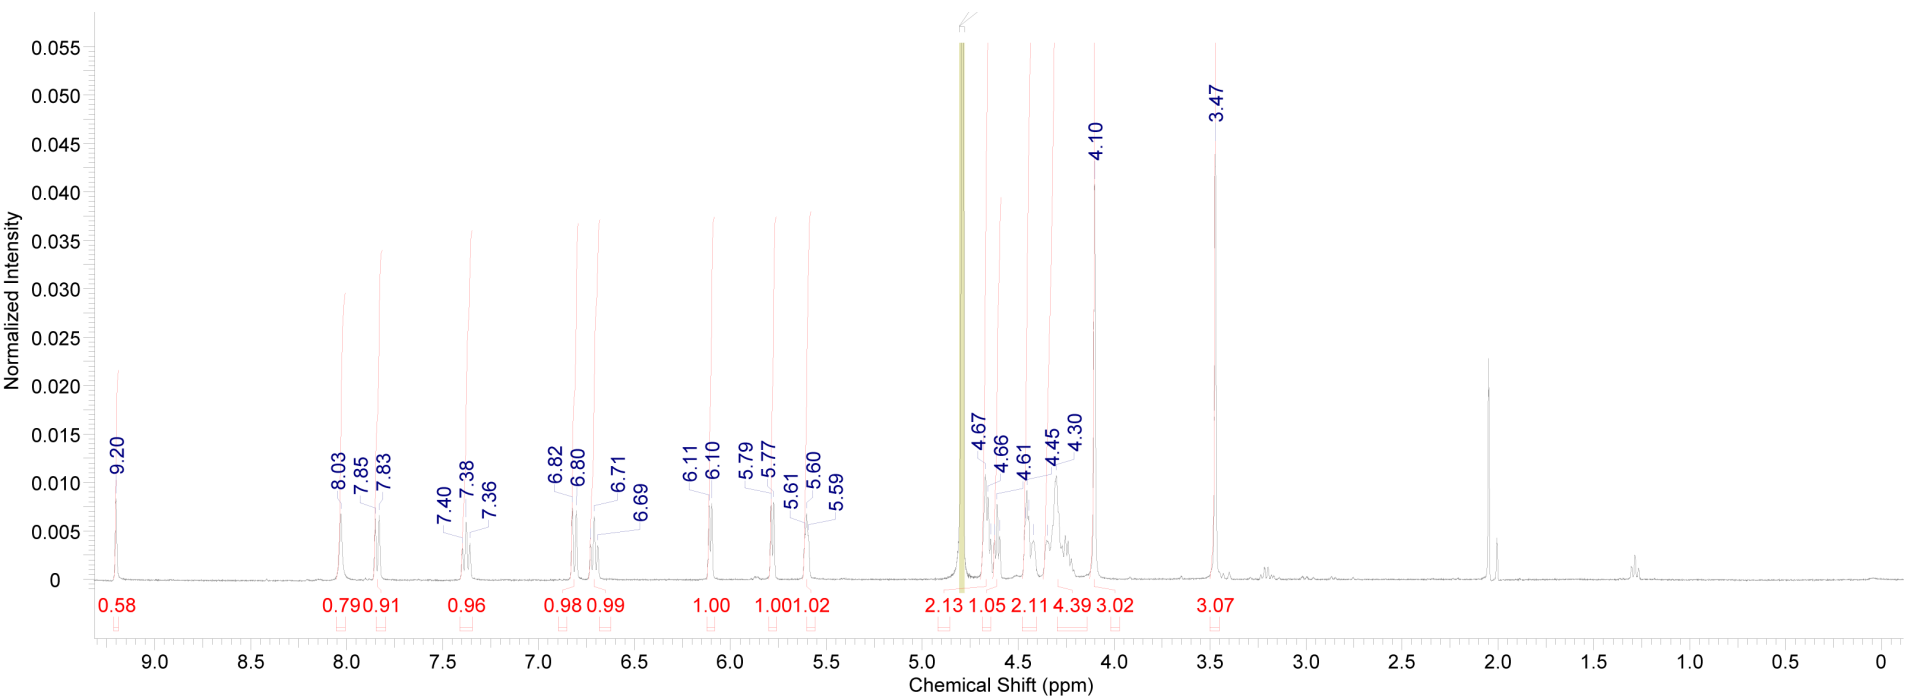

<sup>1</sup>H NMR

# Ant-m<sub>2</sub><sup>7,2'-O</sup>GpppG

**Ziemiak *et al.***  
Synthesis and evaluation of fluorescent  
cap analogues for mRNA labelling  
**supplementary information**

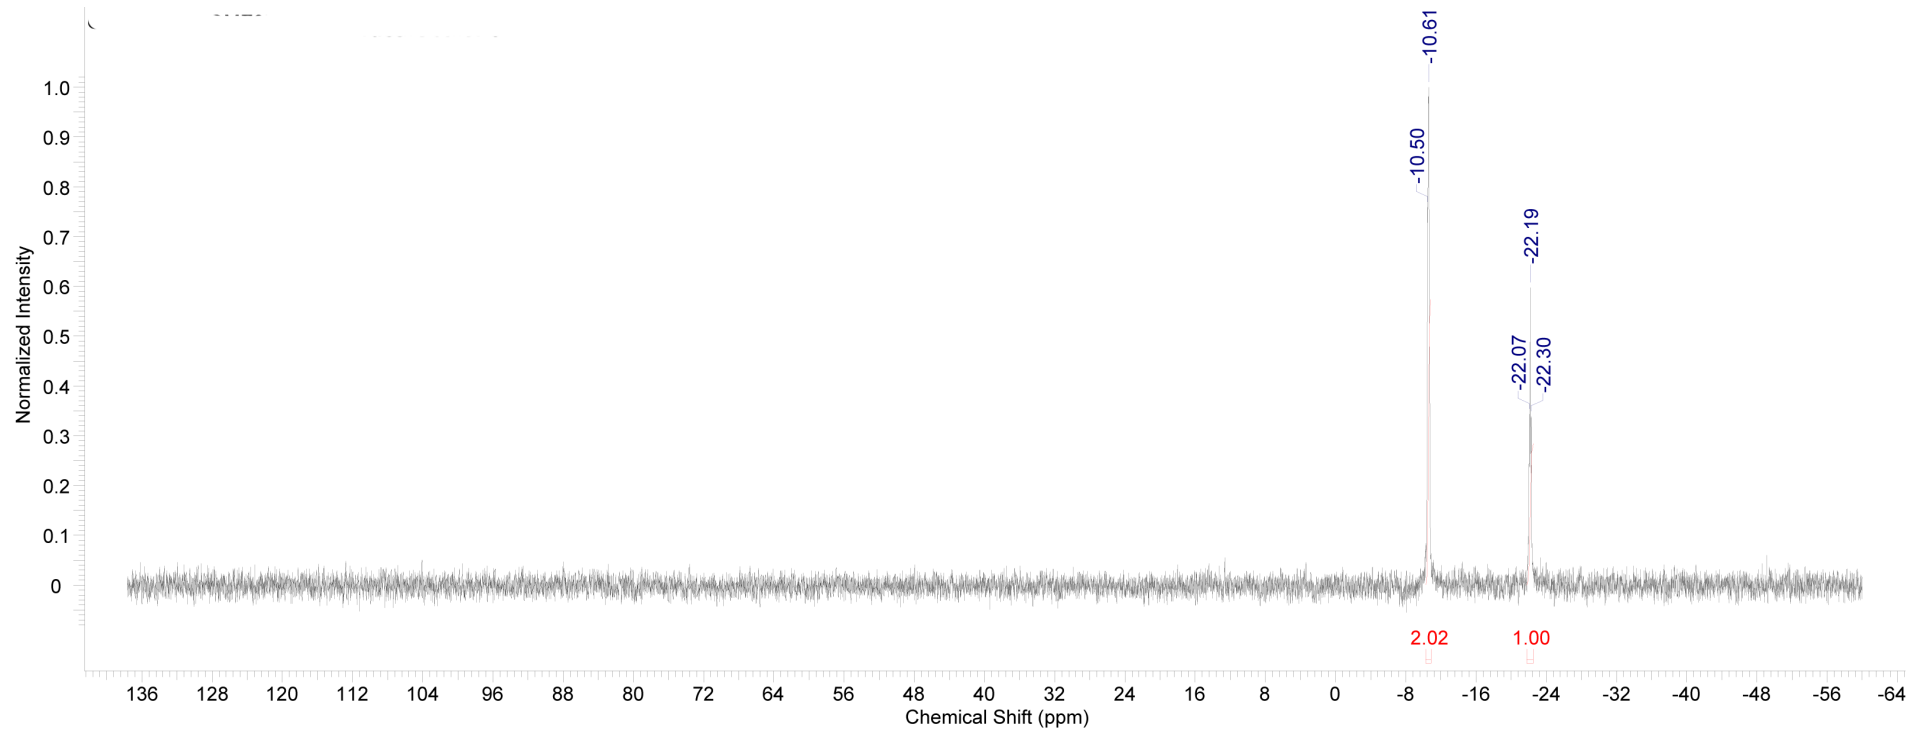

<sup>31</sup>P NMR

# Ant-m<sub>2</sub><sup>7,2'-O</sup>GpppG

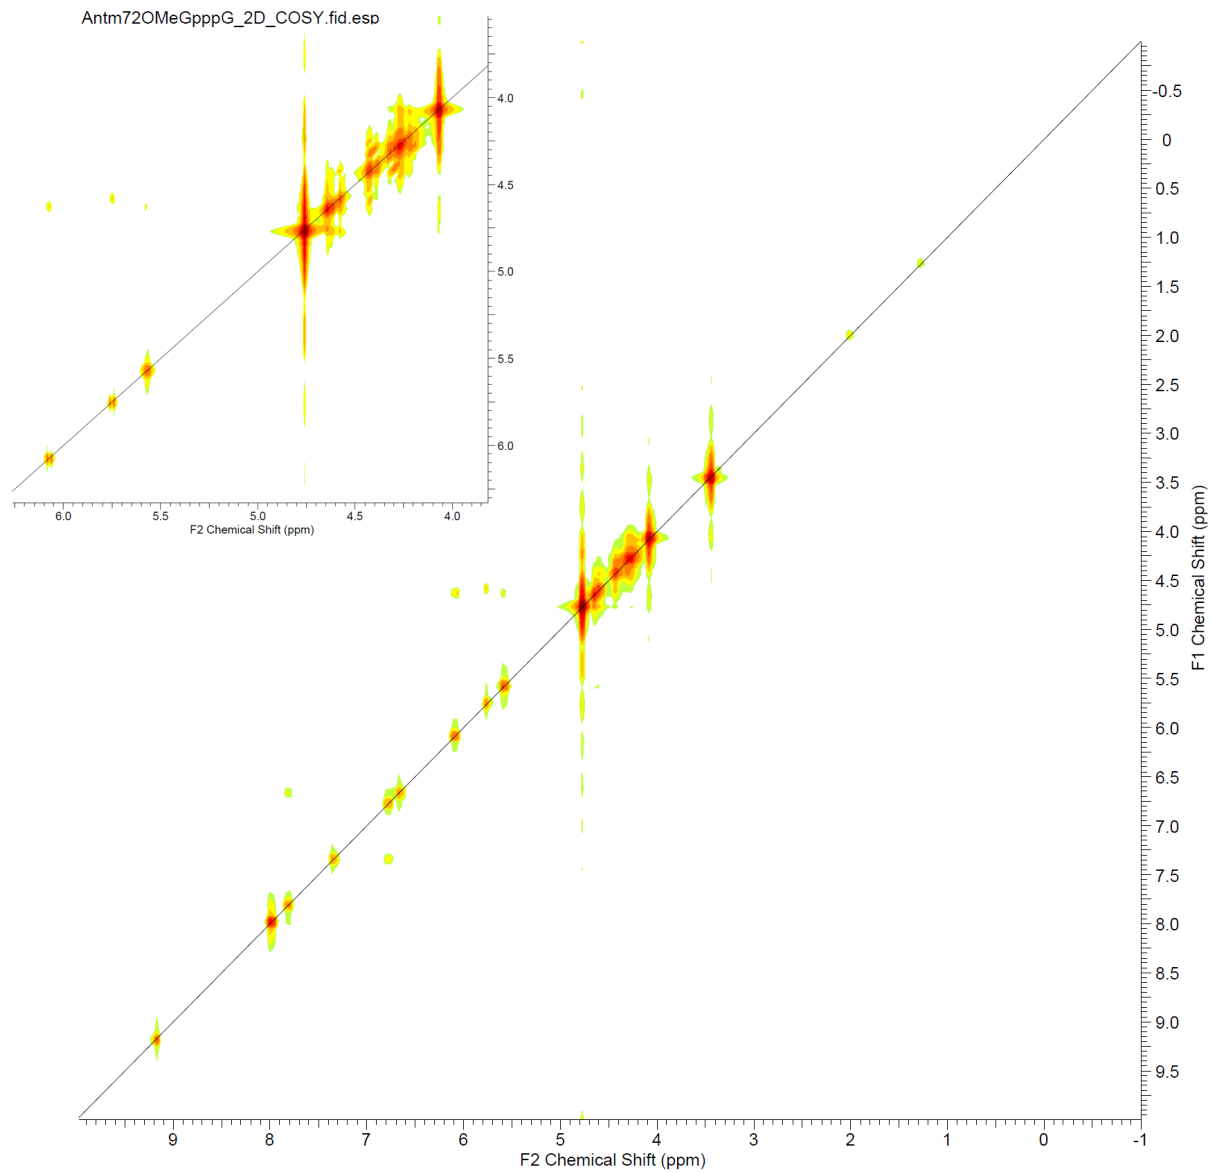



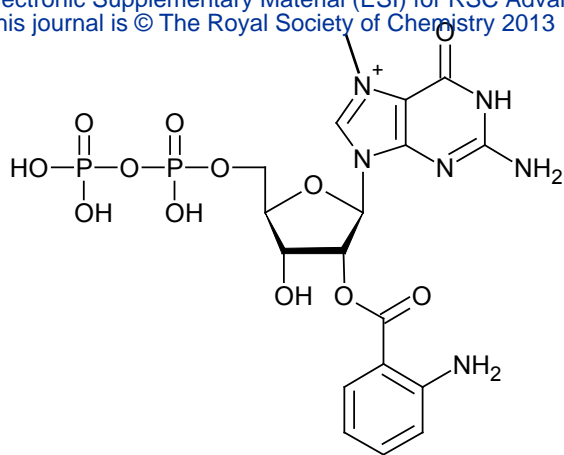

# Ant-m<sup>7</sup>GDP

**Ziemiak *et al.***  
Synthesis and evaluation of fluorescent  
cap analogues for mRNA labelling  
**supplementary information**

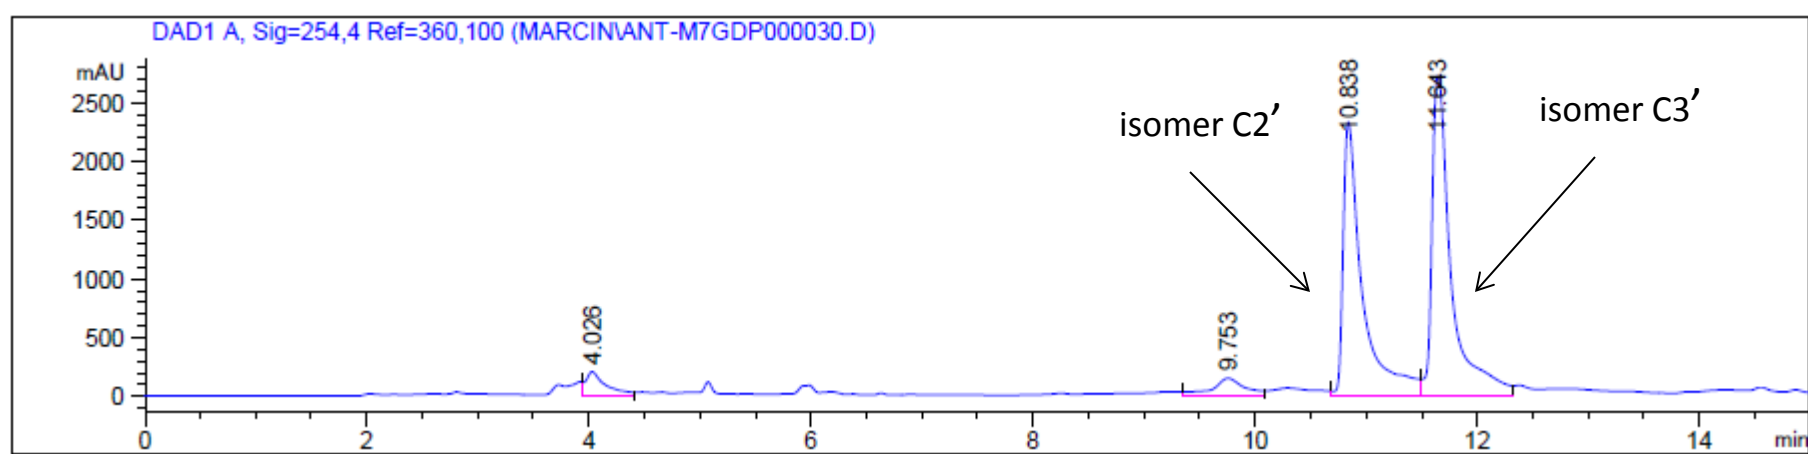

HPLC profile

# Ant-m<sup>7</sup>GDP

**Ziemniak *et al.***  
Synthesis and evaluation of fluorescent  
cap analogues for mRNA labelling  
**supplementary information**

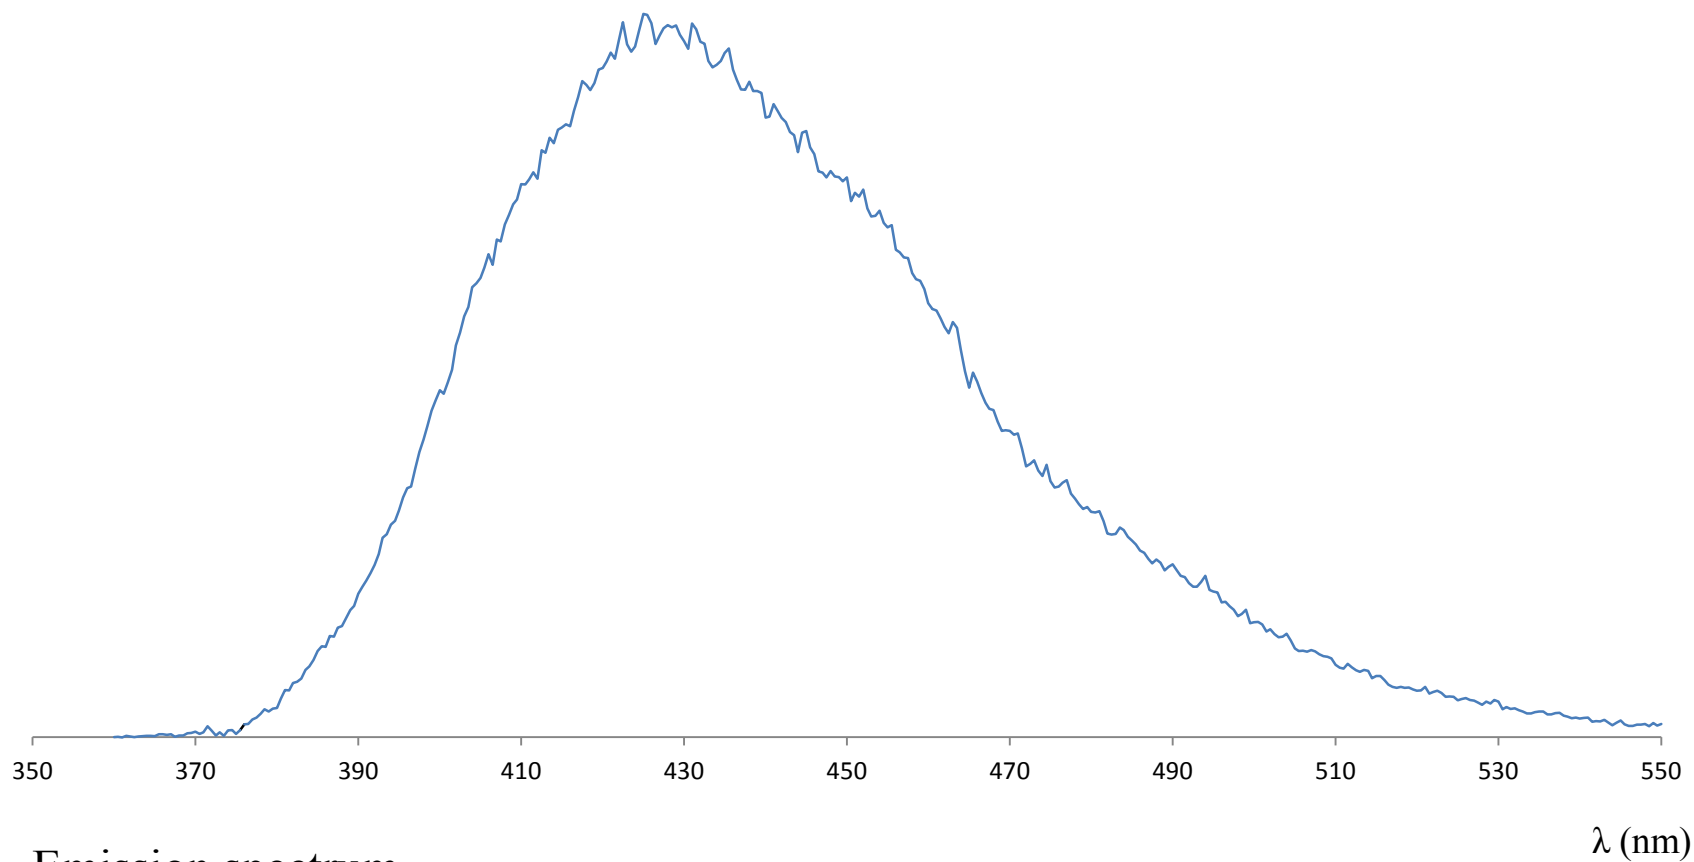

Emission spectrum

λ (nm)

# Ant-m<sup>7</sup>GDP

**Ziemniak *et al.***  
Synthesis and evaluation of fluorescent  
cap analogues for mRNA labelling  
**supplementary information**

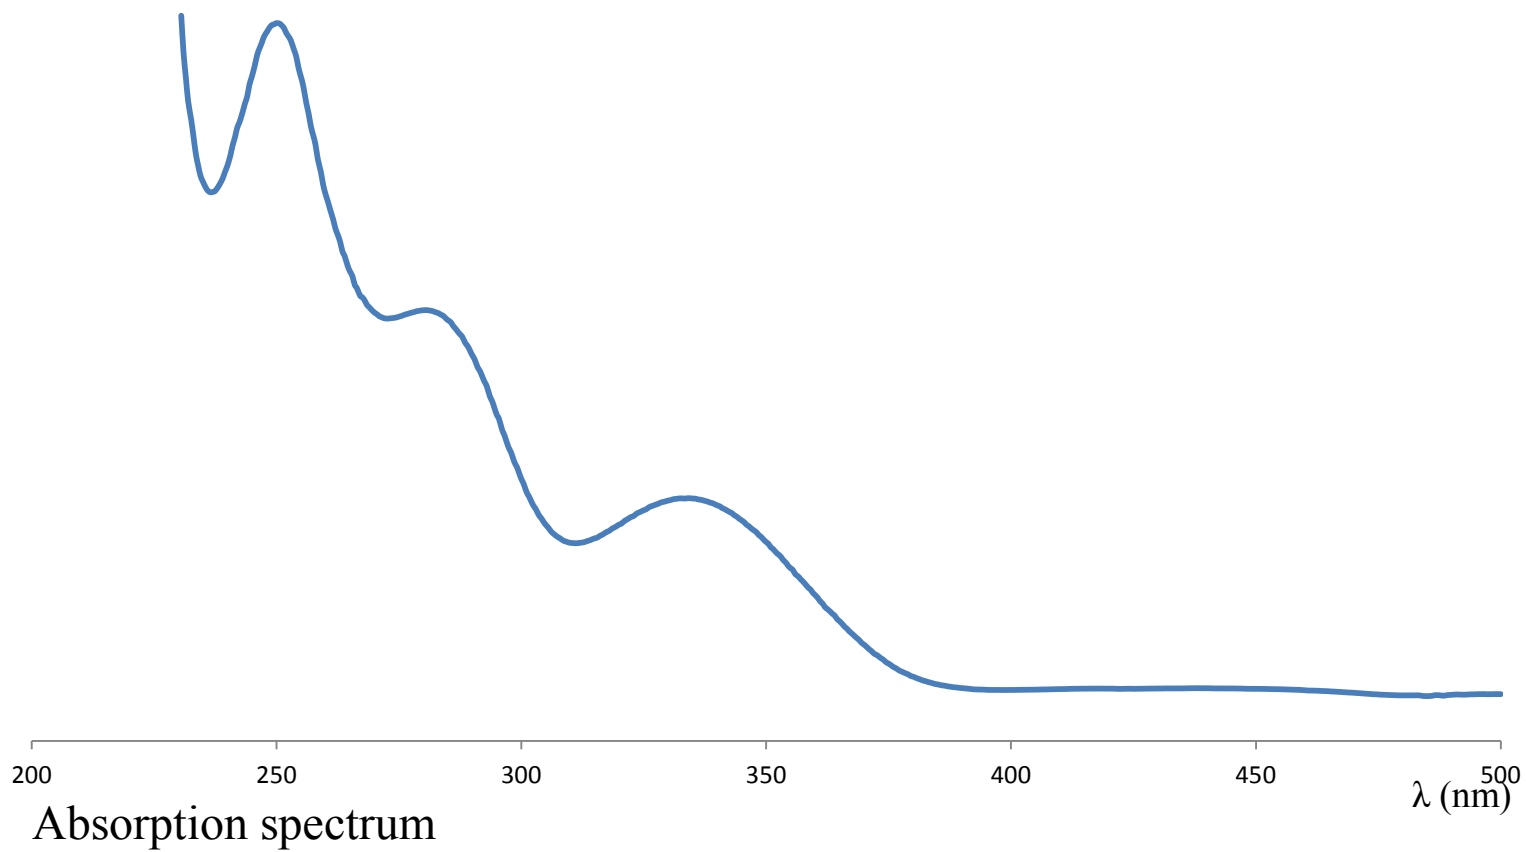

# Ant-m<sup>7</sup>GDP

11229ant\_m7gdp #9-80 RT: 0.16-1.43 AV: 72 NL: 2.61E5  
T: FTMS - p ESI Full ms [100.00-1300.00]

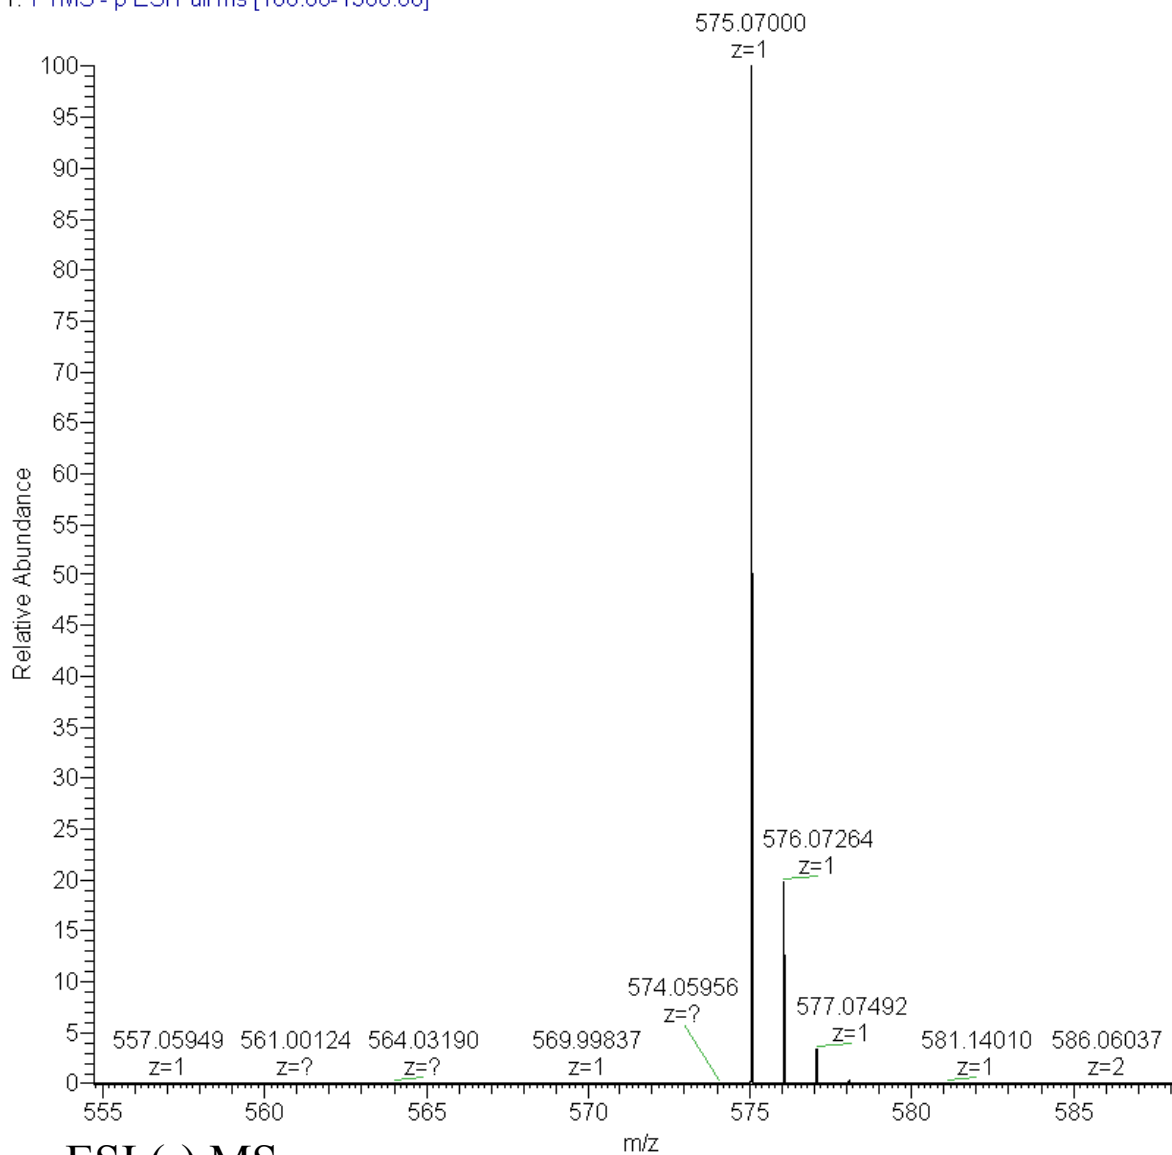

ESI (-) MS

# Ant-m<sup>7</sup>GDP

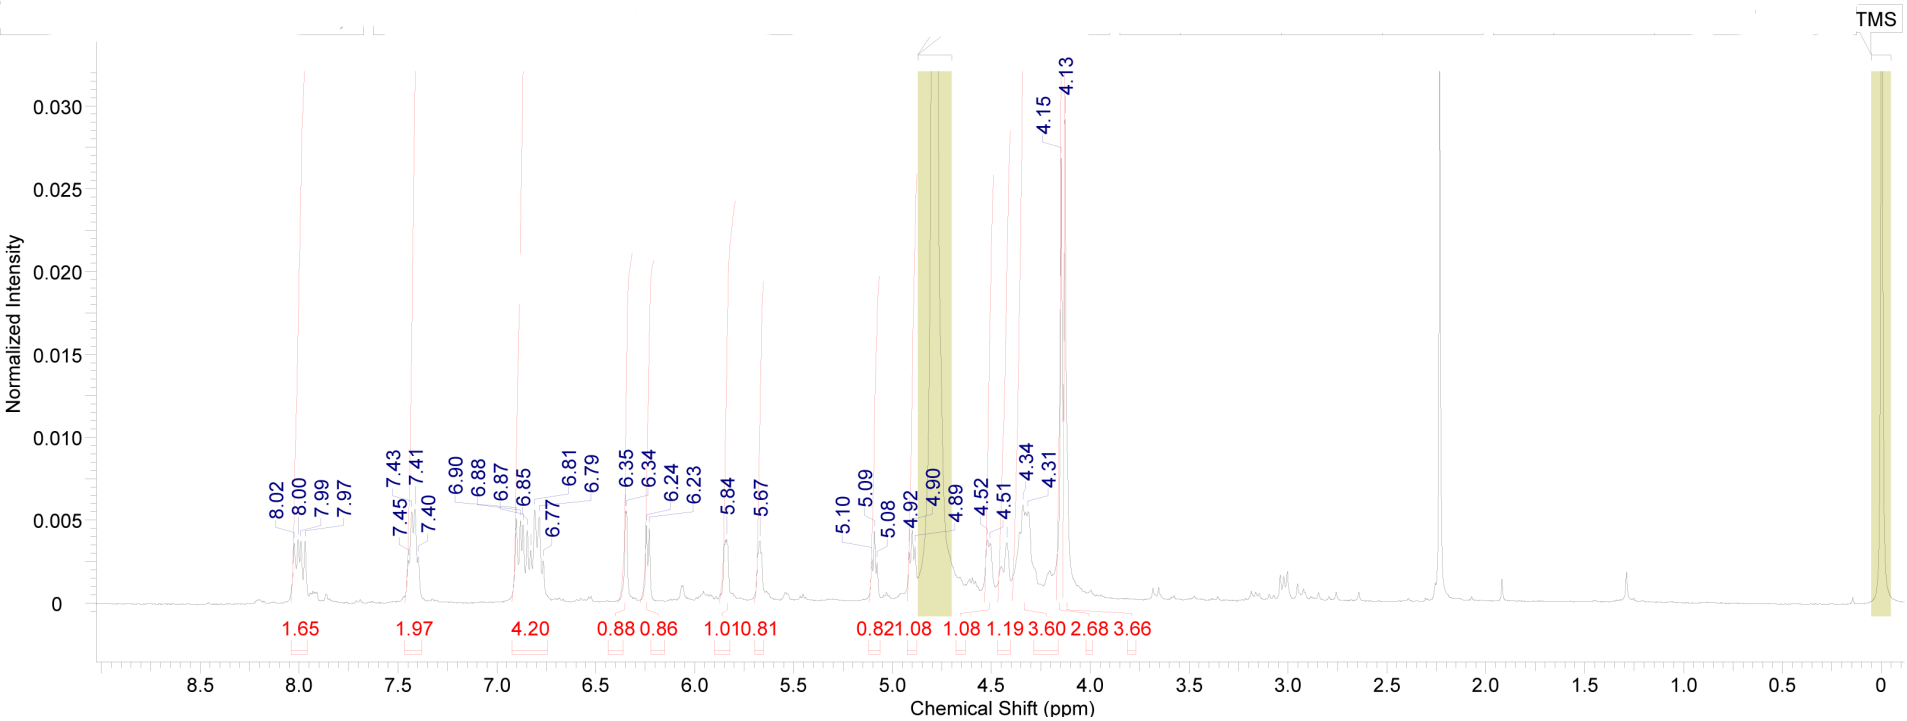

**<sup>1</sup>H NMR**

# Ant-m<sup>7</sup>GDP

**Ziemiak *et al.***  
Synthesis and evaluation of fluorescent  
cap analogues for mRNA labelling  
**supplementary information**

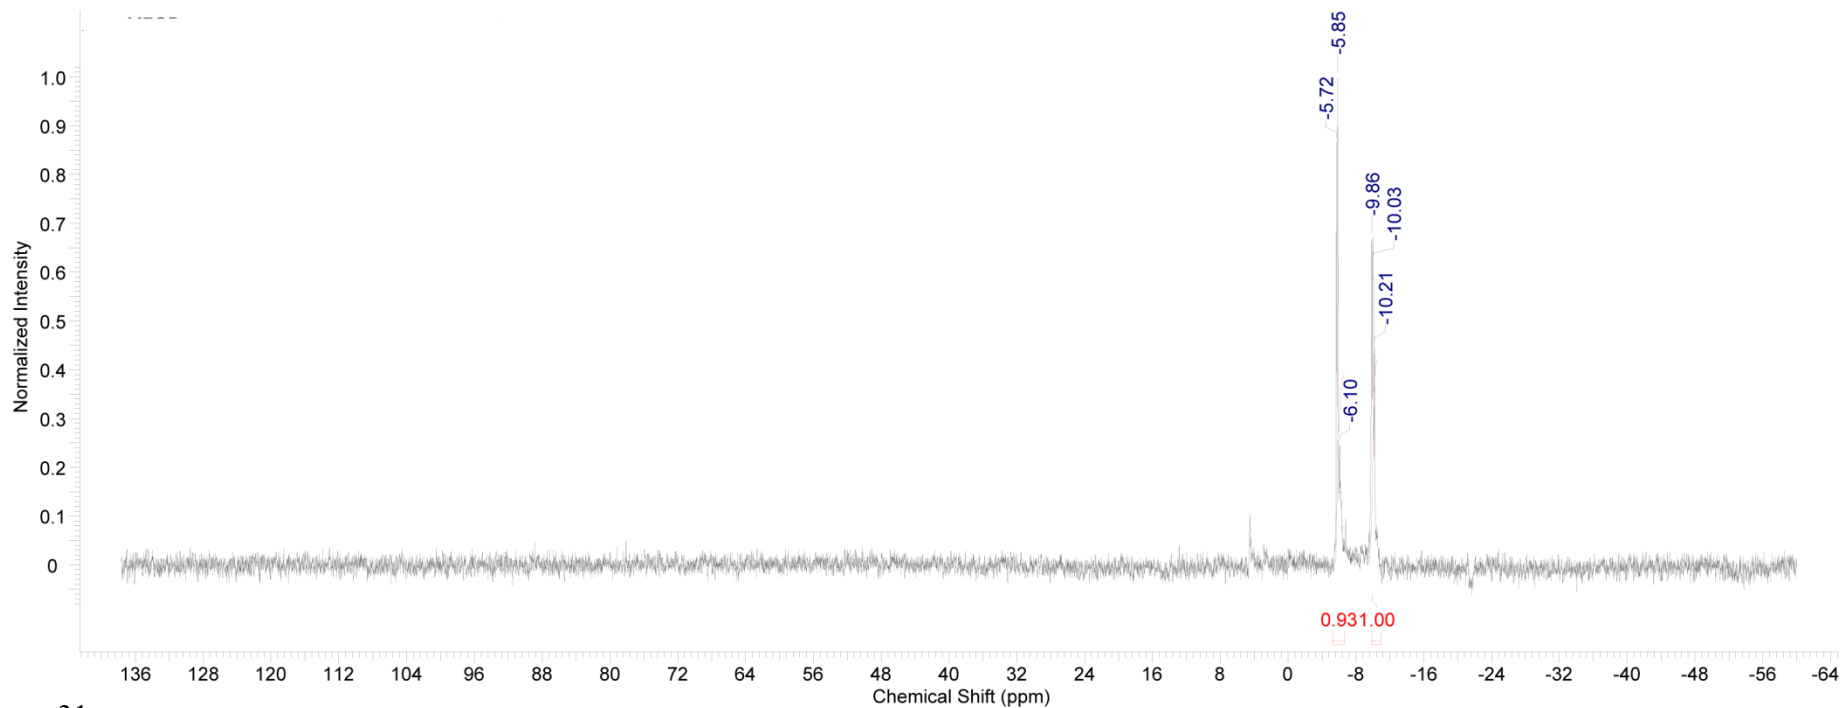

<sup>31</sup>P NMR

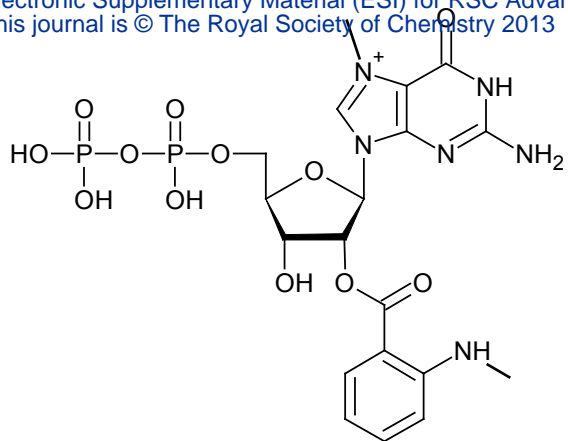

# Mant-m<sup>7</sup>GDP

**Ziemiak *et al.***  
Synthesis and evaluation of fluorescent  
cap analogues for mRNA labelling  
**supplementary information**

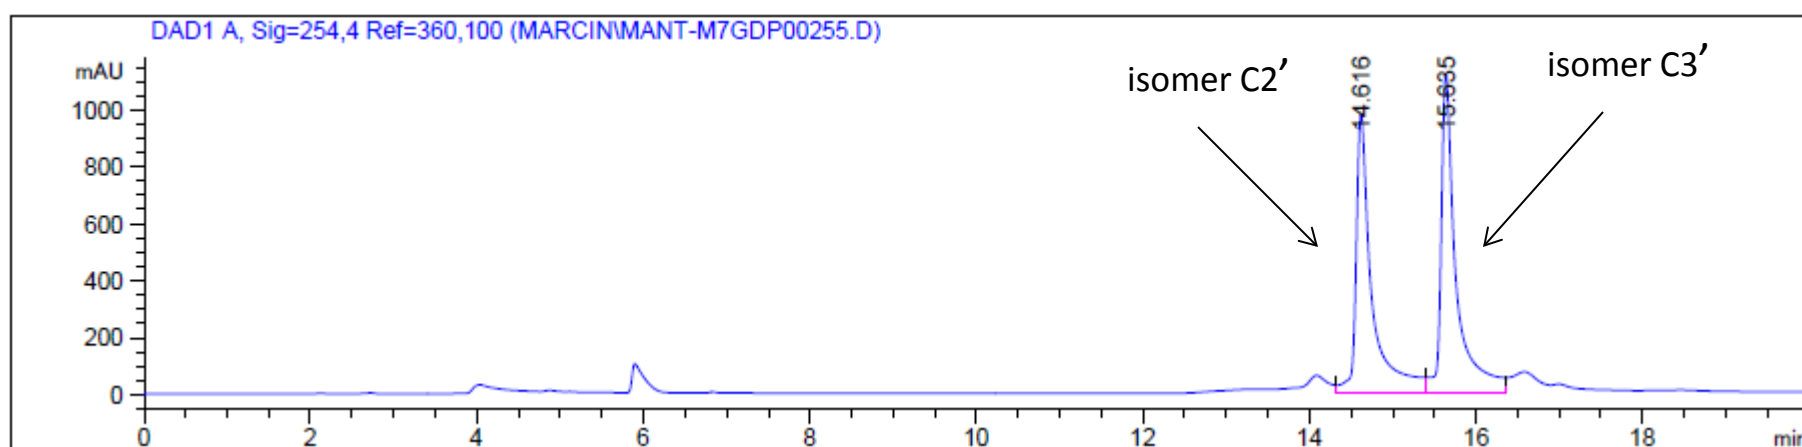

HPLC profile

# Mant-m<sup>7</sup>GDP

11229mant\_m7gdp #16-63 RT: 0.28-1.13 AV: 48 NL: 3.98E5  
T: FTMS - p ESI Full ms [100.00-1300.00]

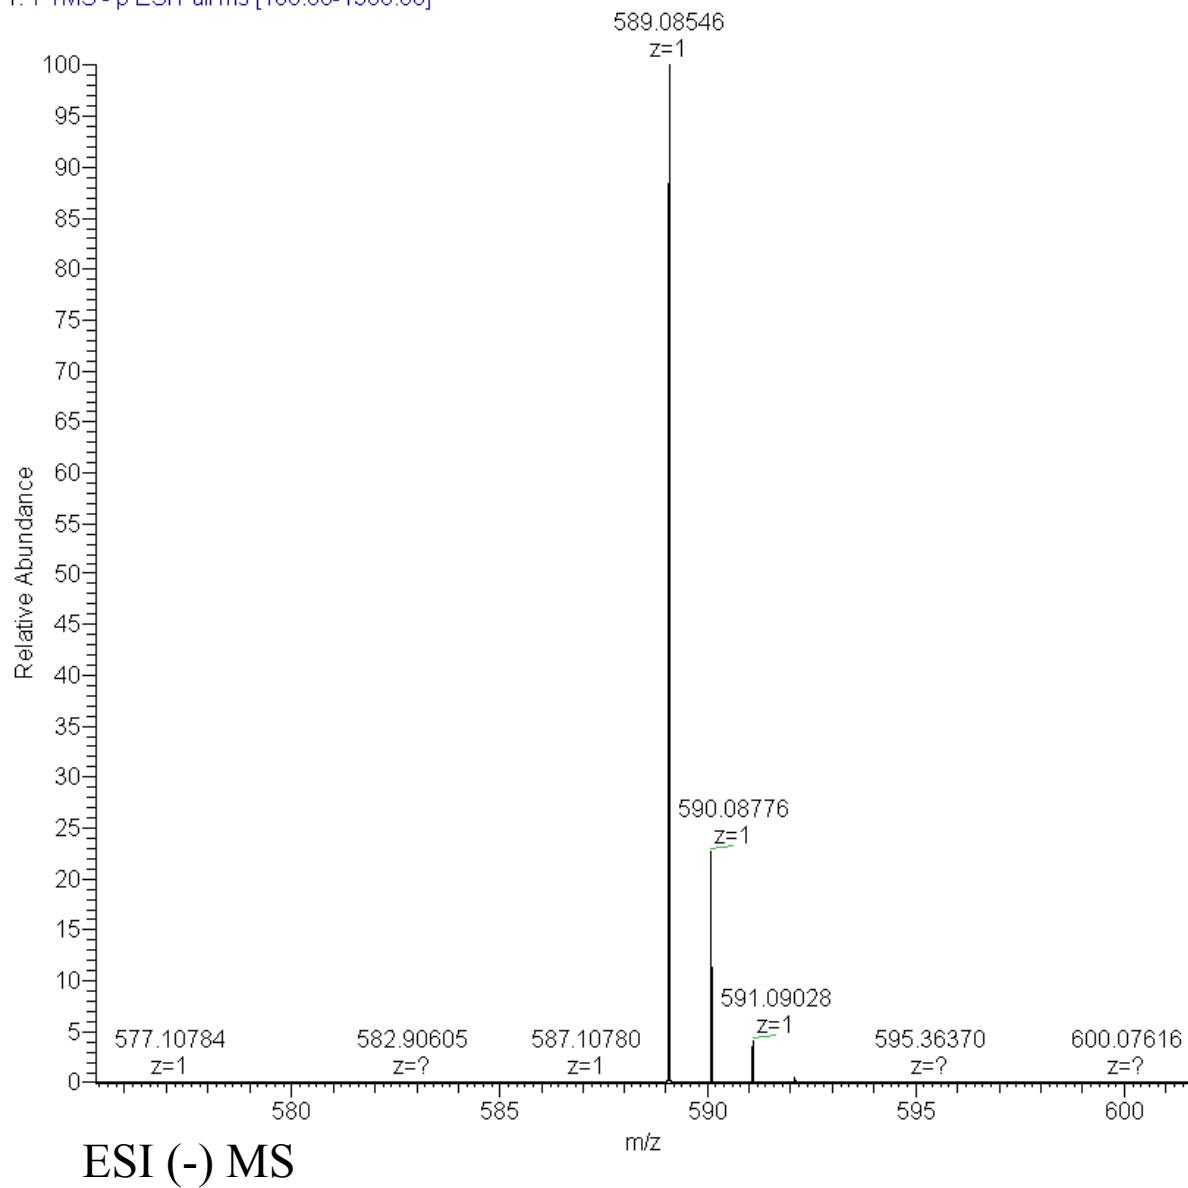



# Mant-m<sup>7</sup>GDP

**Ziemniak *et al.***  
Synthesis and evaluation of fluorescent  
cap analogues for mRNA labelling  
**supplementary information**

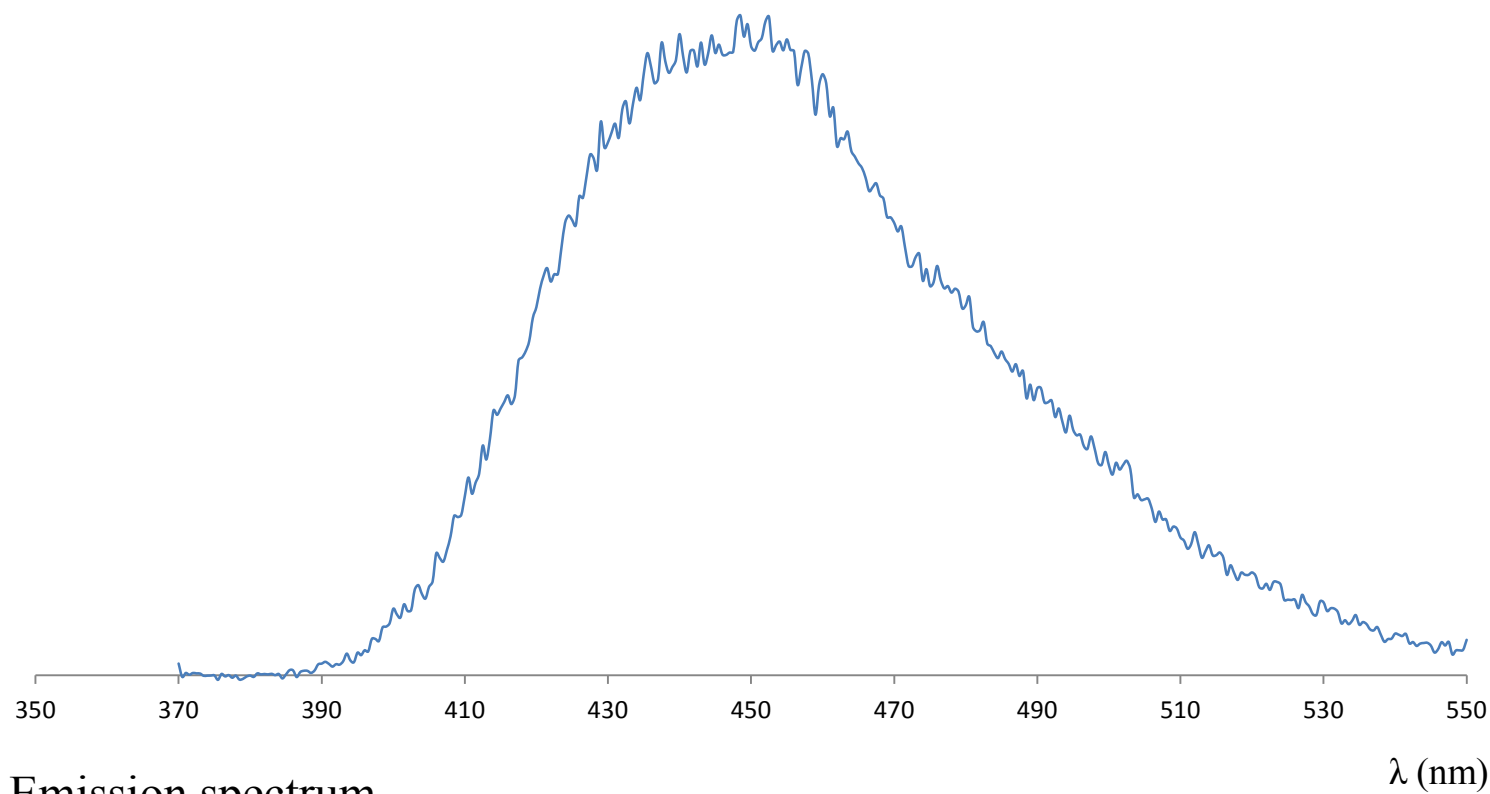

Emission spectrum

λ (nm)

# Mant-m<sup>7</sup>GDP

**Ziemniak *et al.***  
Synthesis and evaluation of fluorescent  
cap analogues for mRNA labelling  
**supplementary information**

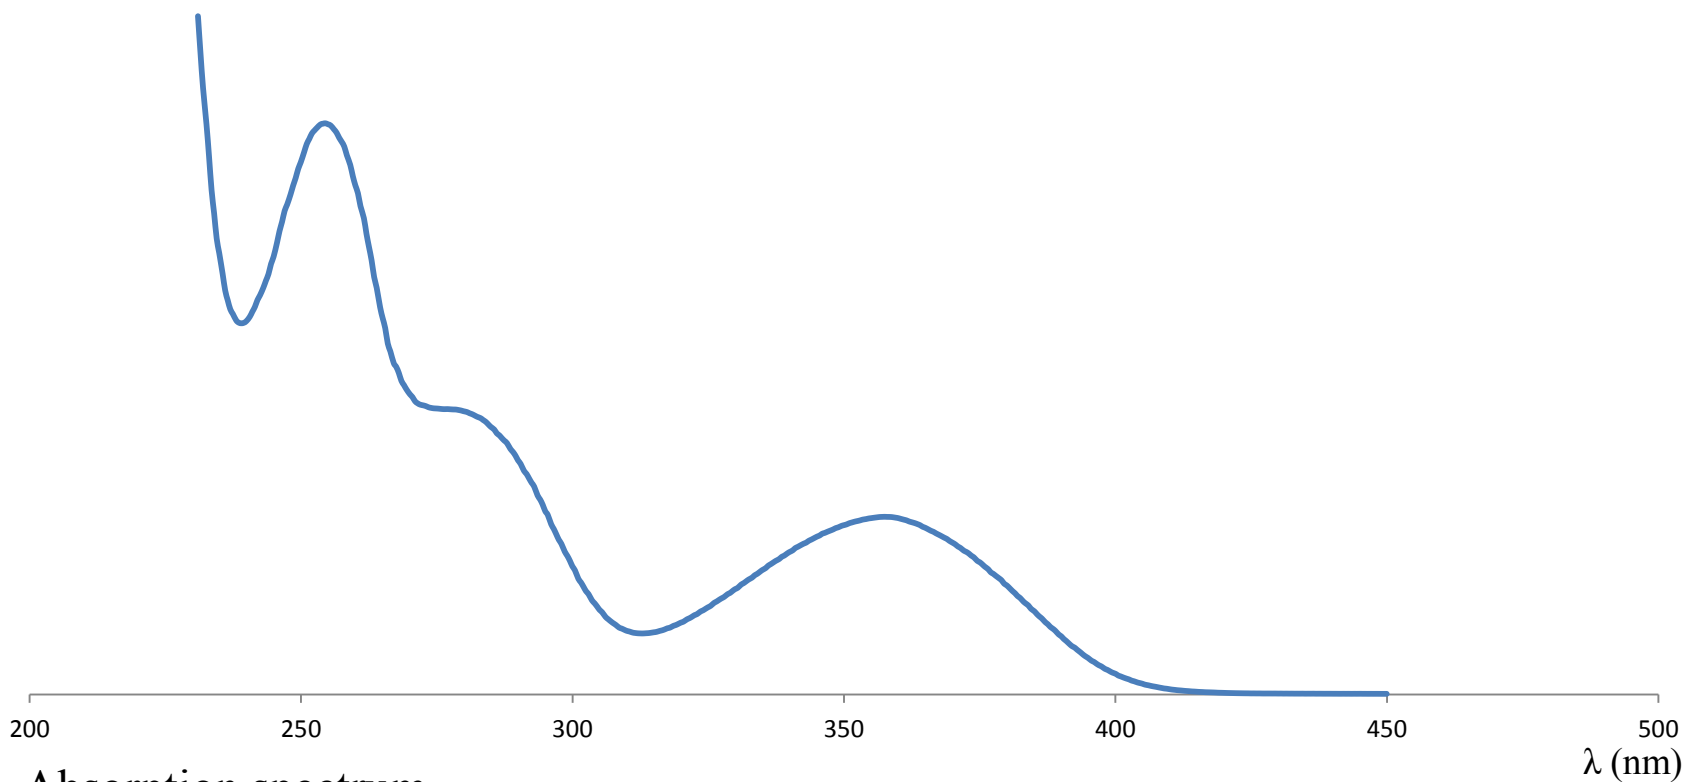

Absorption spectrum

λ (nm)

# Mant-m<sup>7</sup>GpCH<sub>2</sub>p

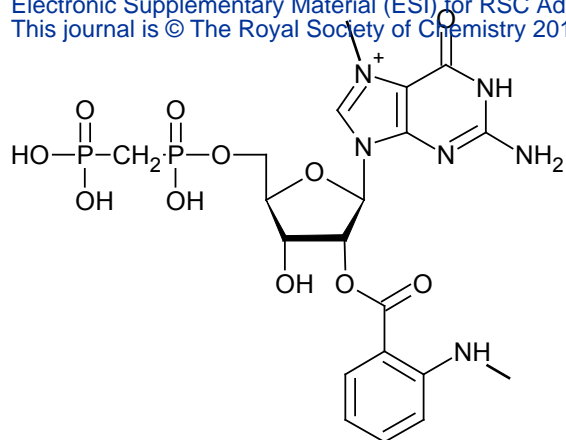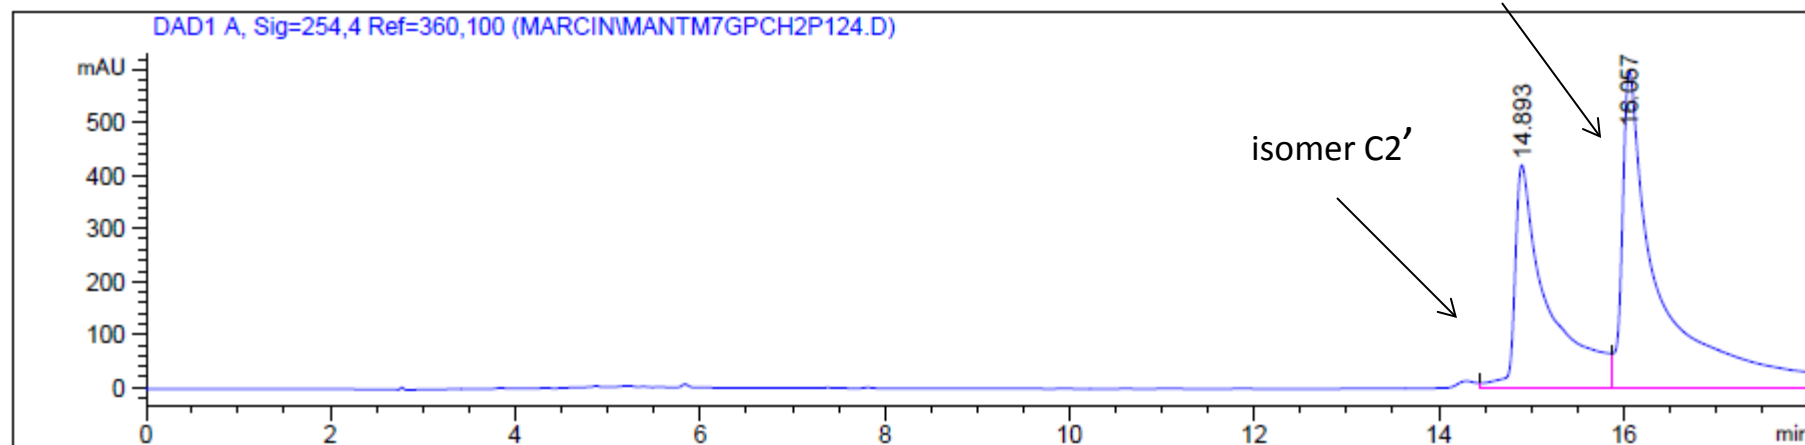

HPLC profile

# Mant-m<sup>7</sup>GpCH<sub>2</sub>p

11229mant\_m7gpch2p #32-96 RT: 0.57-1.72 AV: 65 NL: 3.56E5  
T: FTMS - p ESI Full ms [100.00-1300.00]

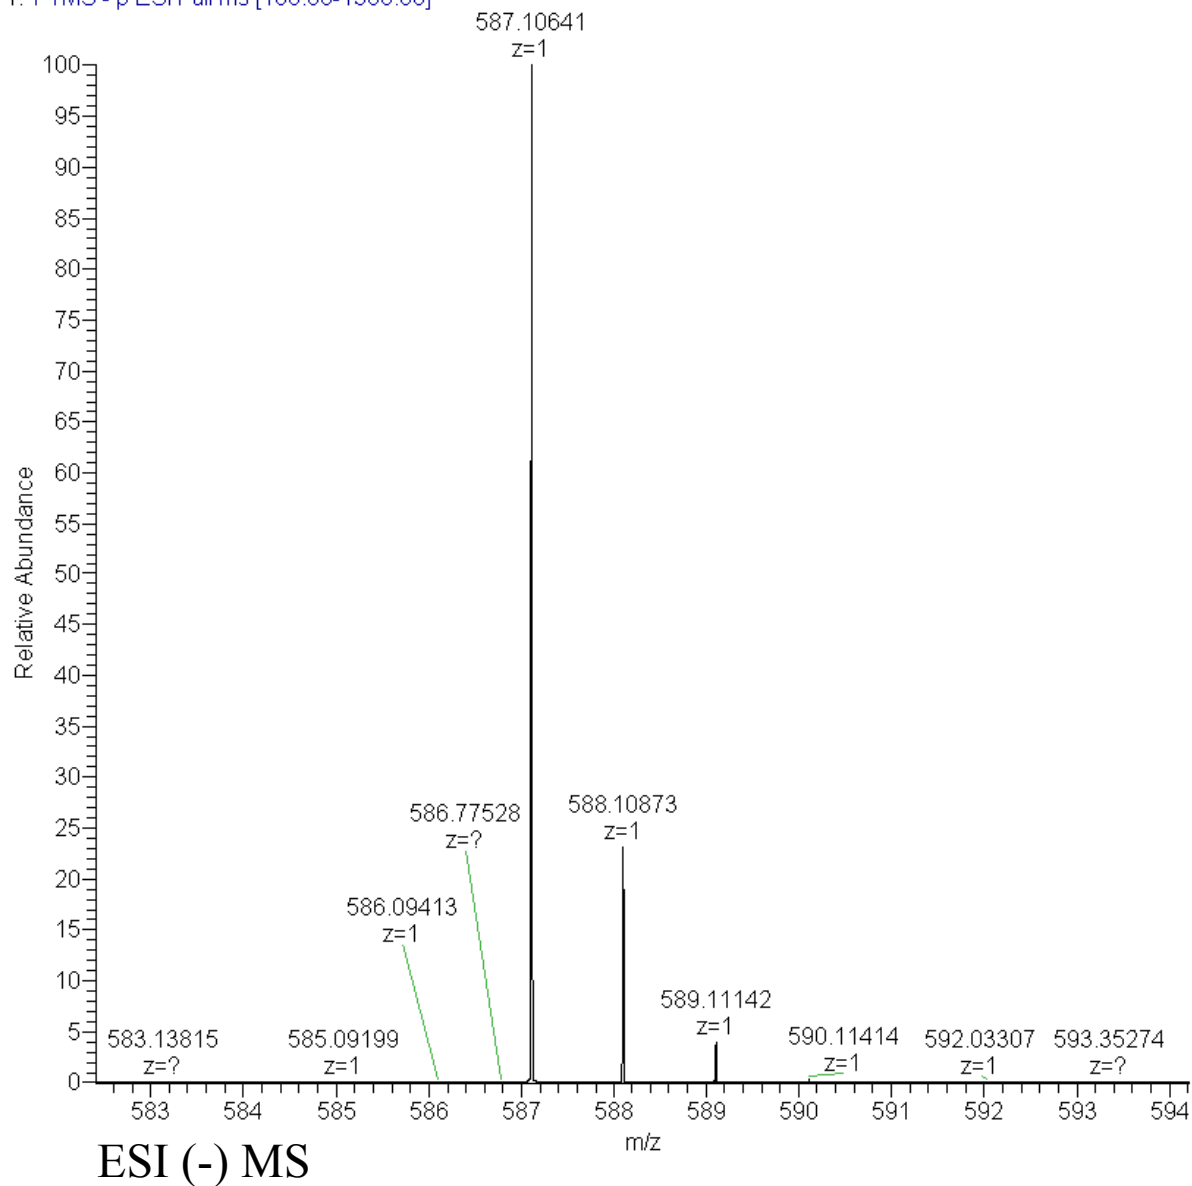

# Mant-m<sup>7</sup>GpCH<sub>2</sub>p

**Ziemniak *et al.***  
Synthesis and evaluation of fluorescent  
cap analogues for mRNA labelling  
**supplementary information**

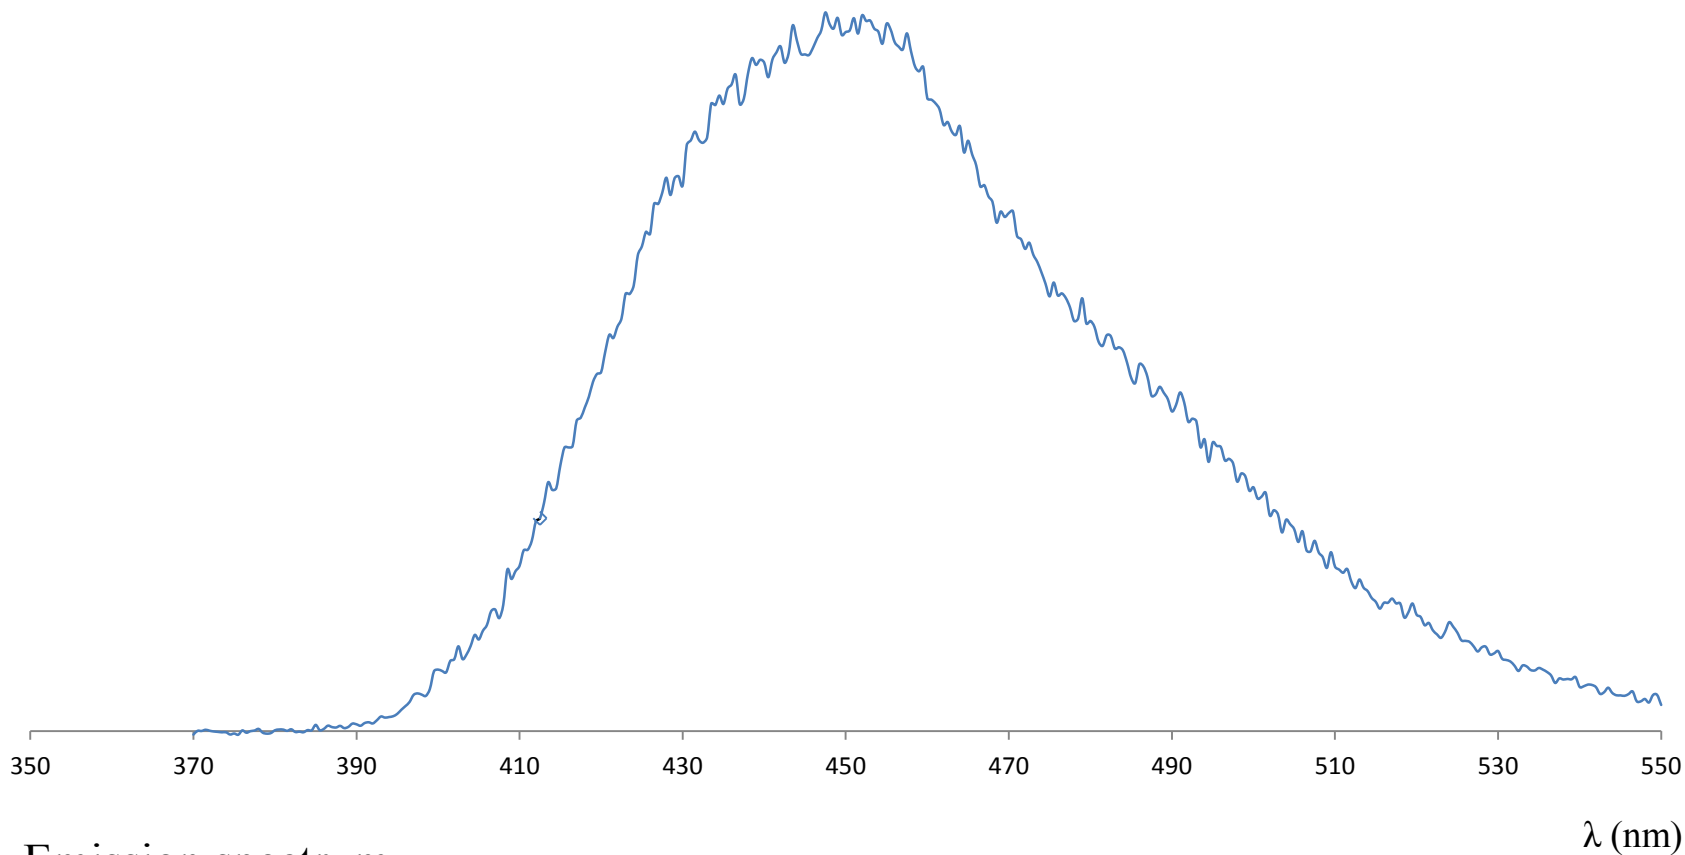

Emission spectrum

λ (nm)

# Mant-m<sup>7</sup>GpCH<sub>2</sub>p

**Ziemniak *et al.***  
Synthesis and evaluation of fluorescent  
cap analogues for mRNA labelling  
**supplementary information**

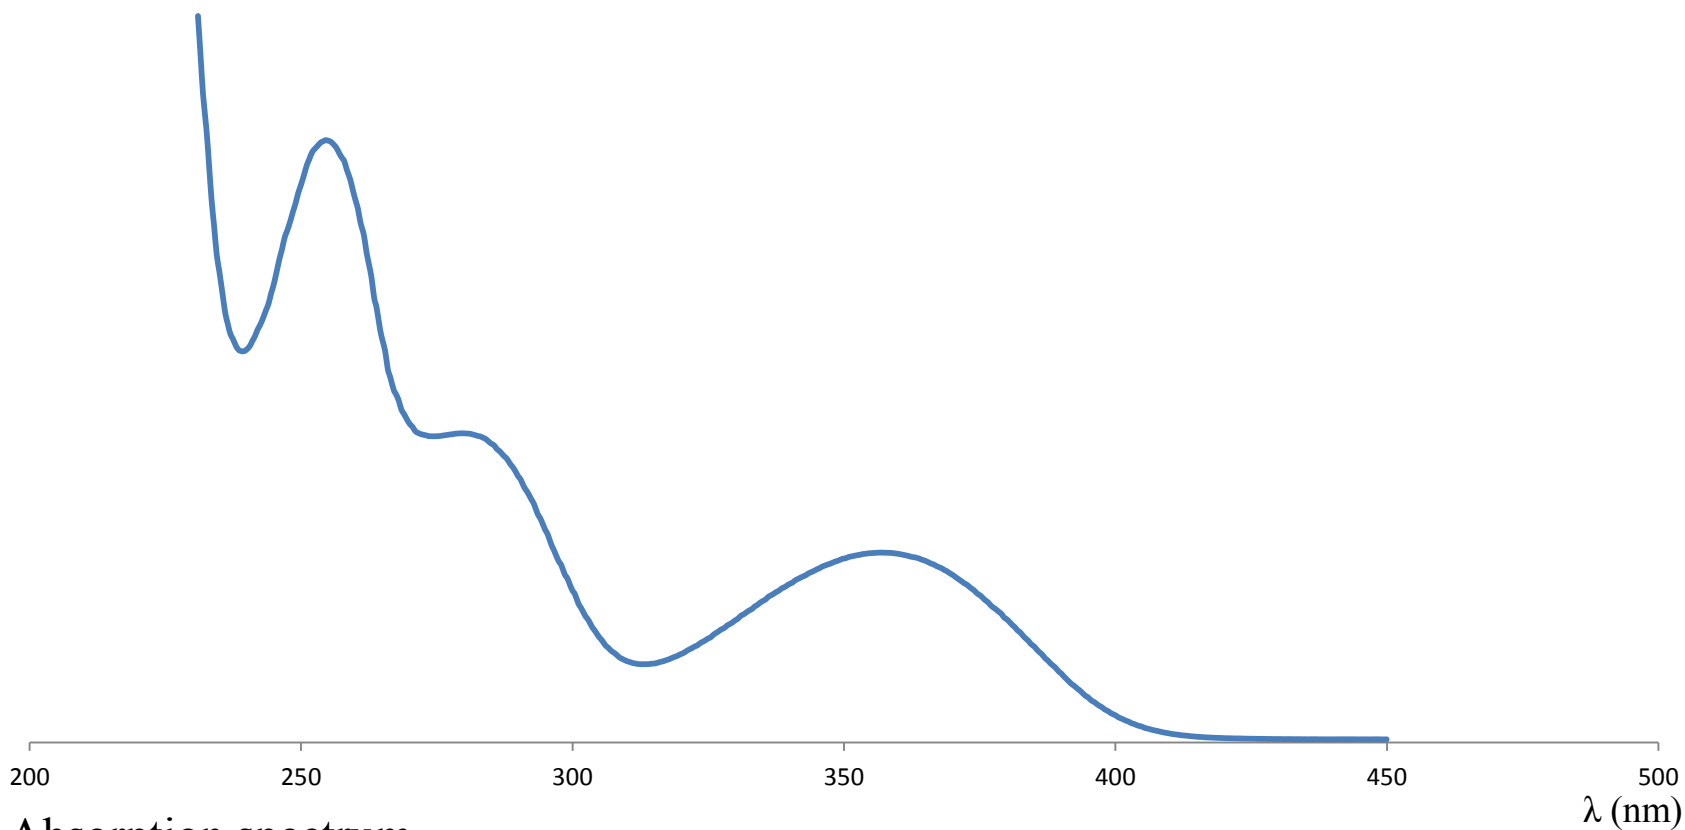

Absorption spectrum

λ (nm)

# Ant-m<sub>2</sub><sup>7,2'-O</sup>GMP

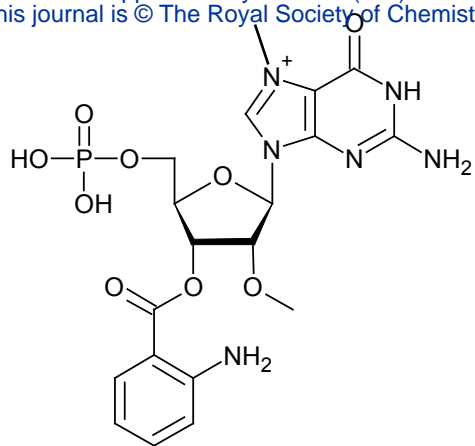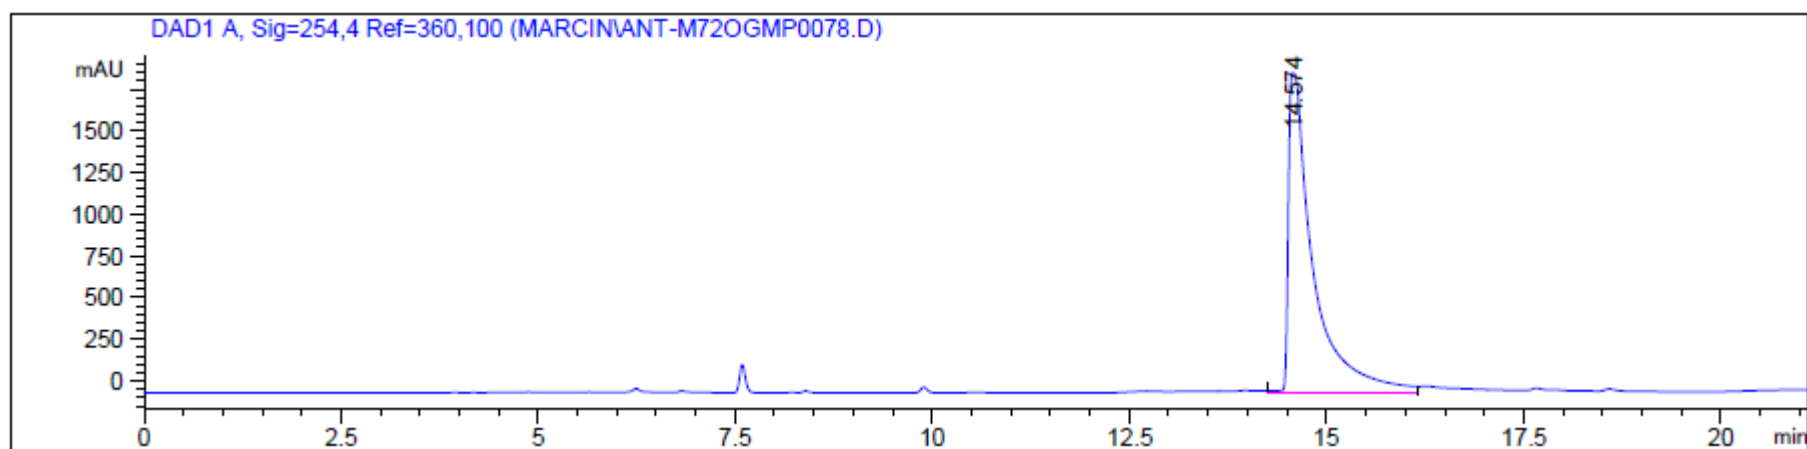

HPLC profile

# Ant-m<sub>2</sub><sup>7,2'-O</sup>GMP

130312\_mz\_001 #24-45 RT: 0.37-0.70 AV: 22 NL: 2.51E6  
T: FTMS - p ESI Full ms [250.00-1500.00]

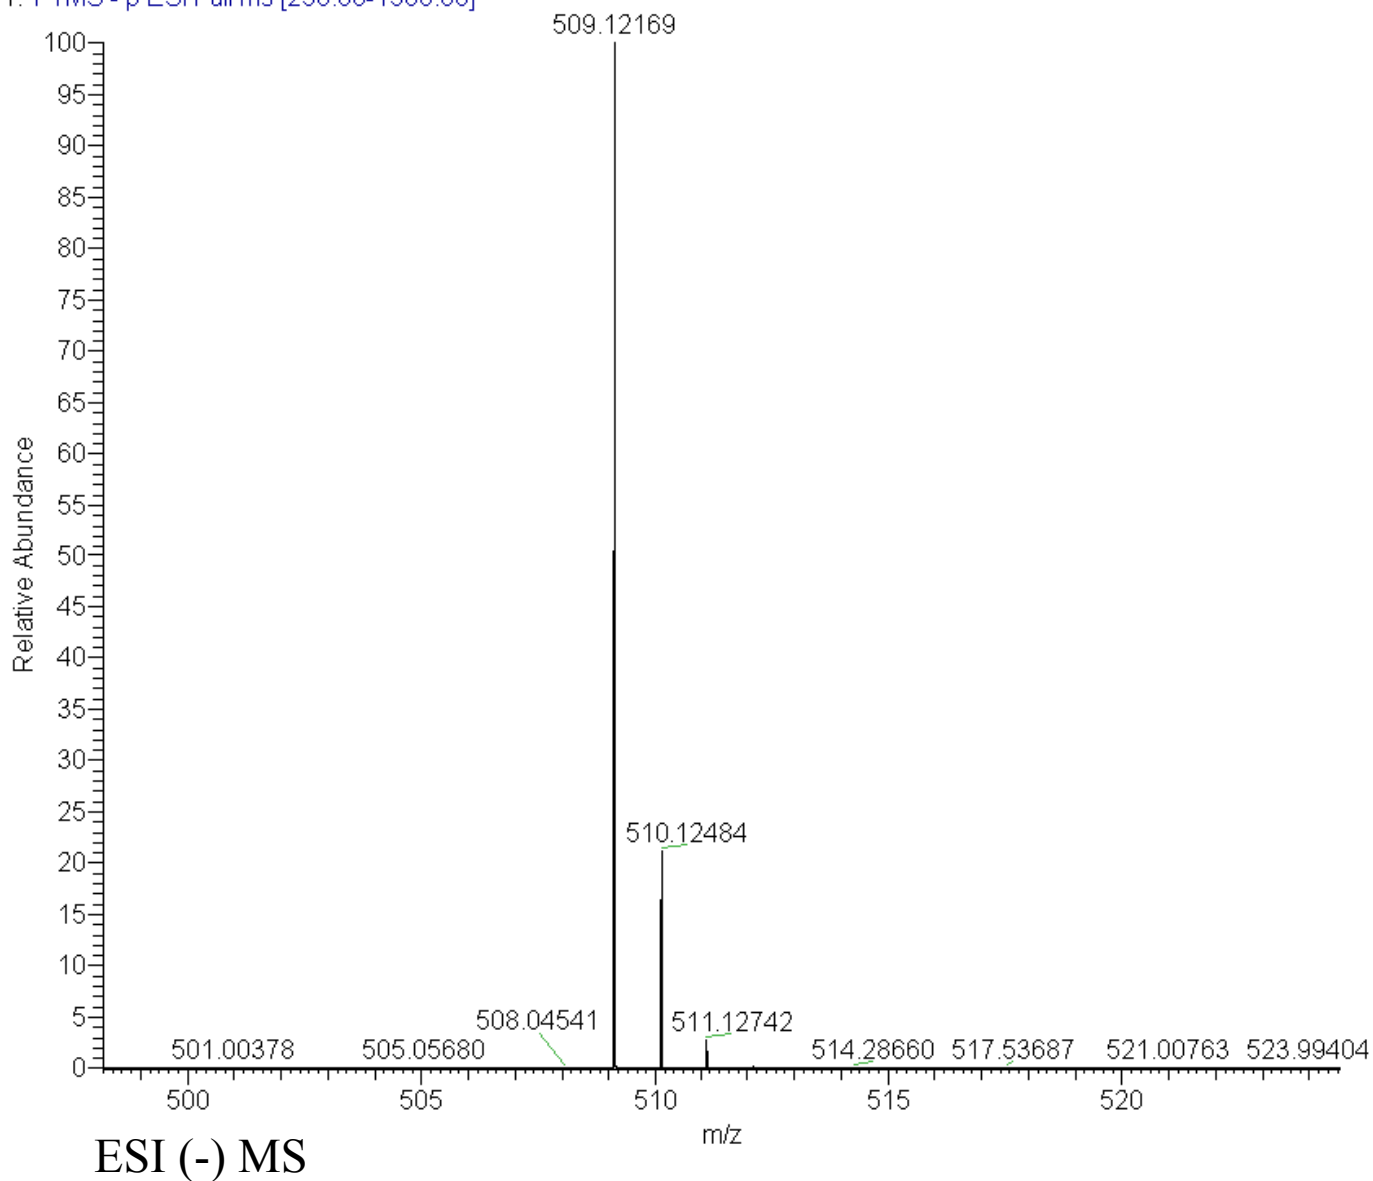



# Ant-m<sub>2</sub><sup>7,2'-O</sup>GMP

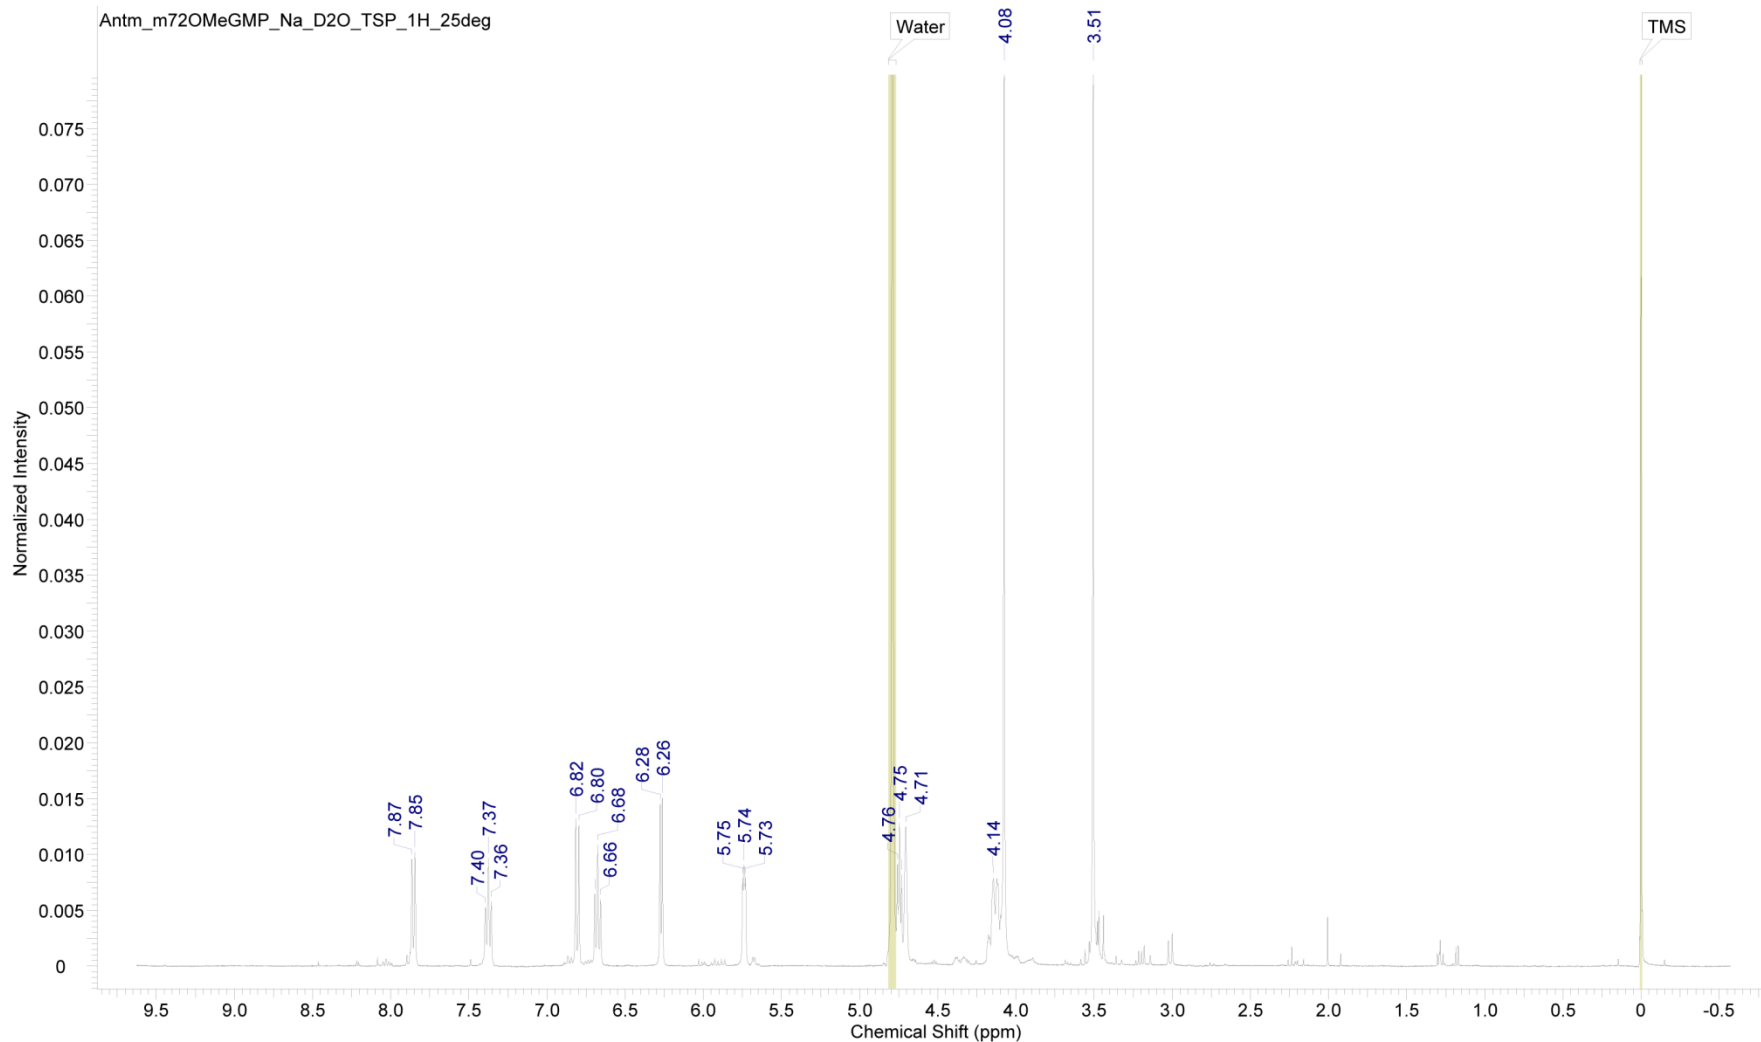

<sup>1</sup>H NMR

# Ant-m<sub>2</sub><sup>7,2'-O</sup>GMP

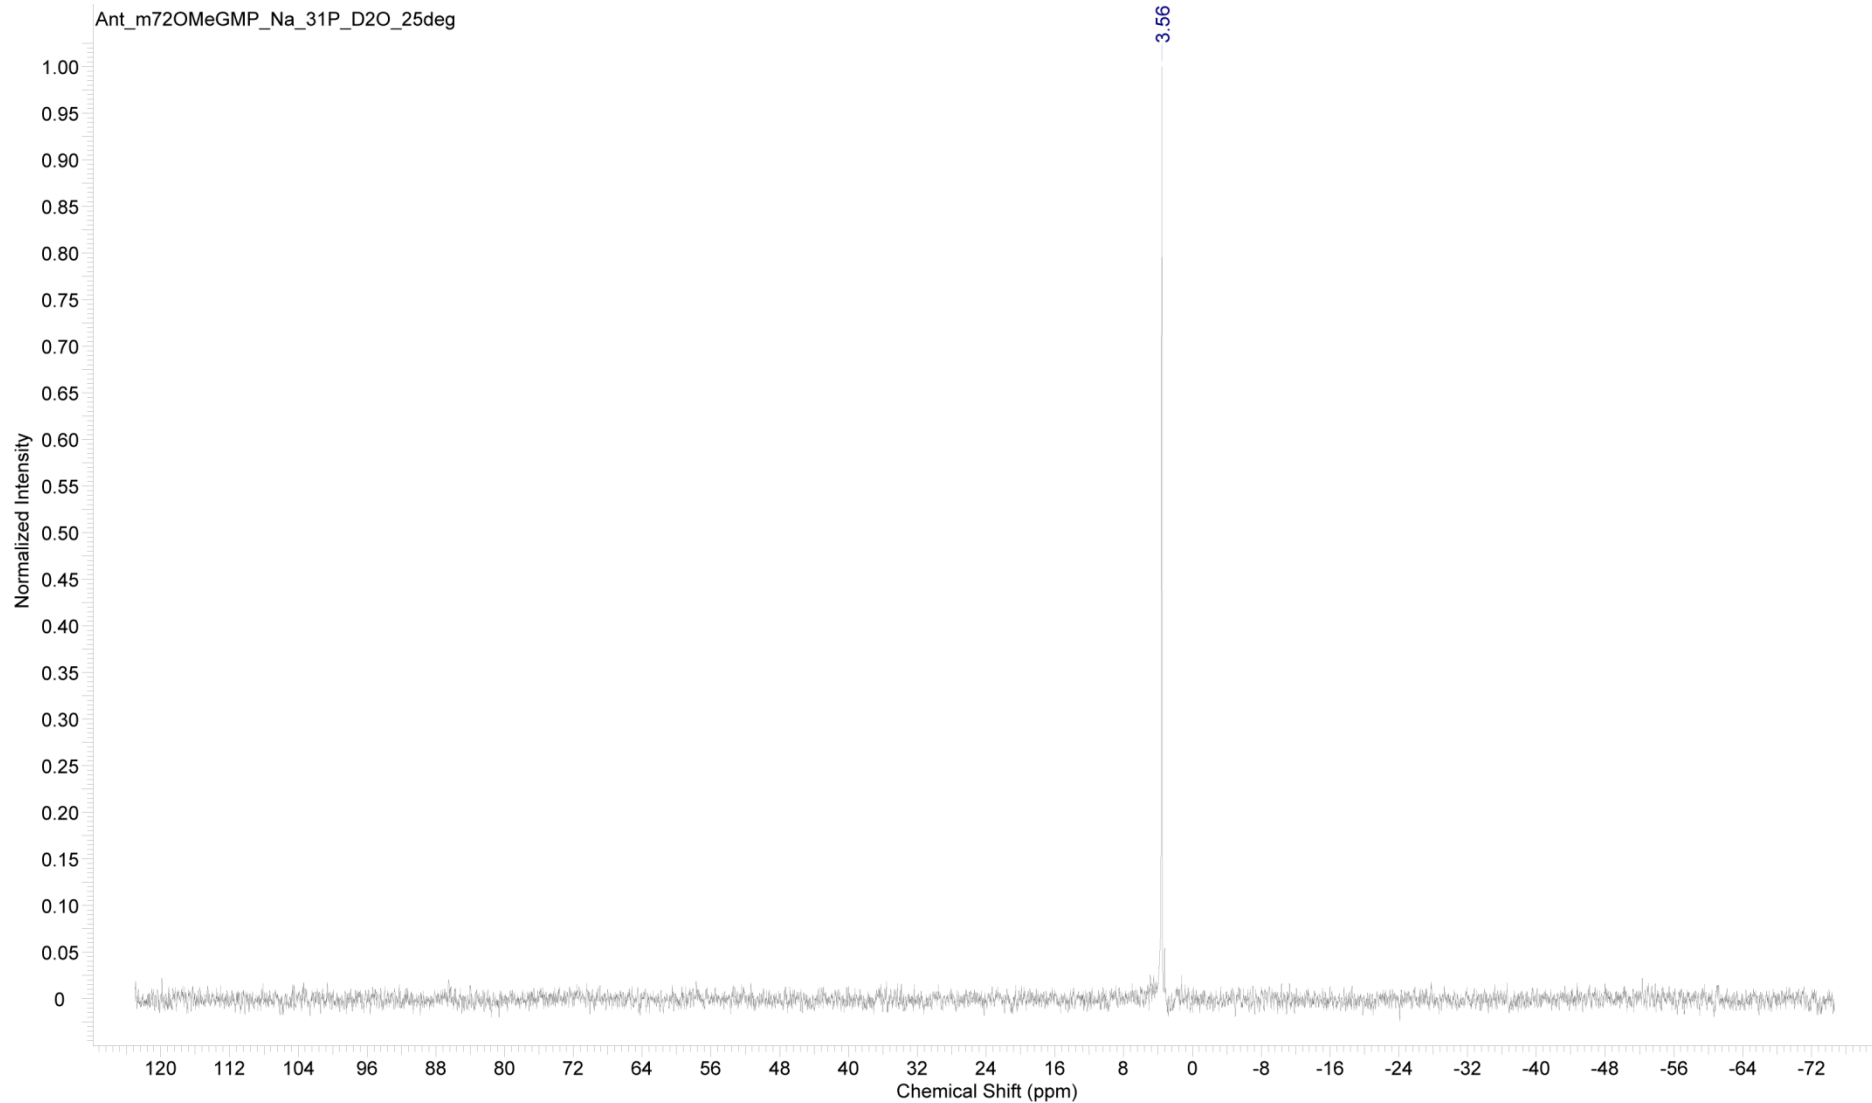

<sup>31</sup>P NMR

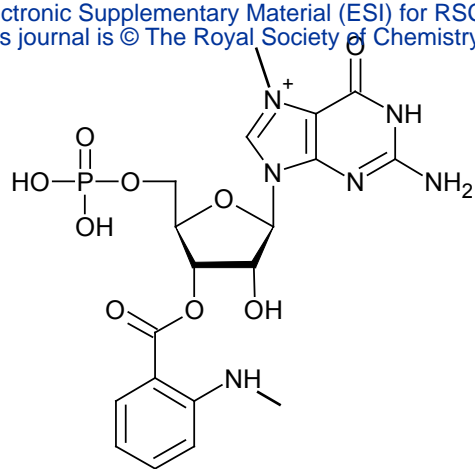

# Mant-m<sup>7</sup>GMP

**Ziemiak *et al.***  
Synthesis and evaluation of fluorescent  
cap analogues for mRNA labelling  
**supplementary information**

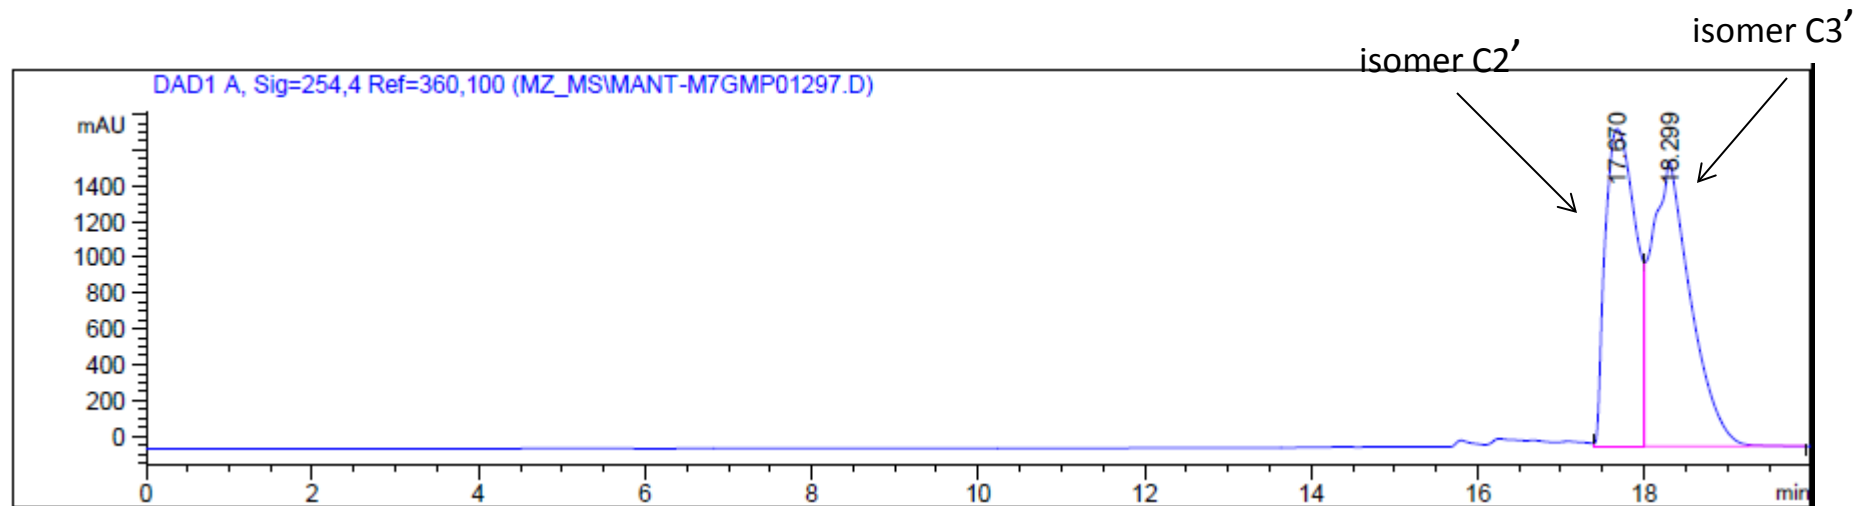

HPLC profile

# Mant-m<sup>7</sup>GMP

130312\_mz\_002 #2-26 RT: 0.02-0.38 AV: 25 NL: 5.84E5  
T: FTMS - p ESI Full ms [250.00-1500.00]

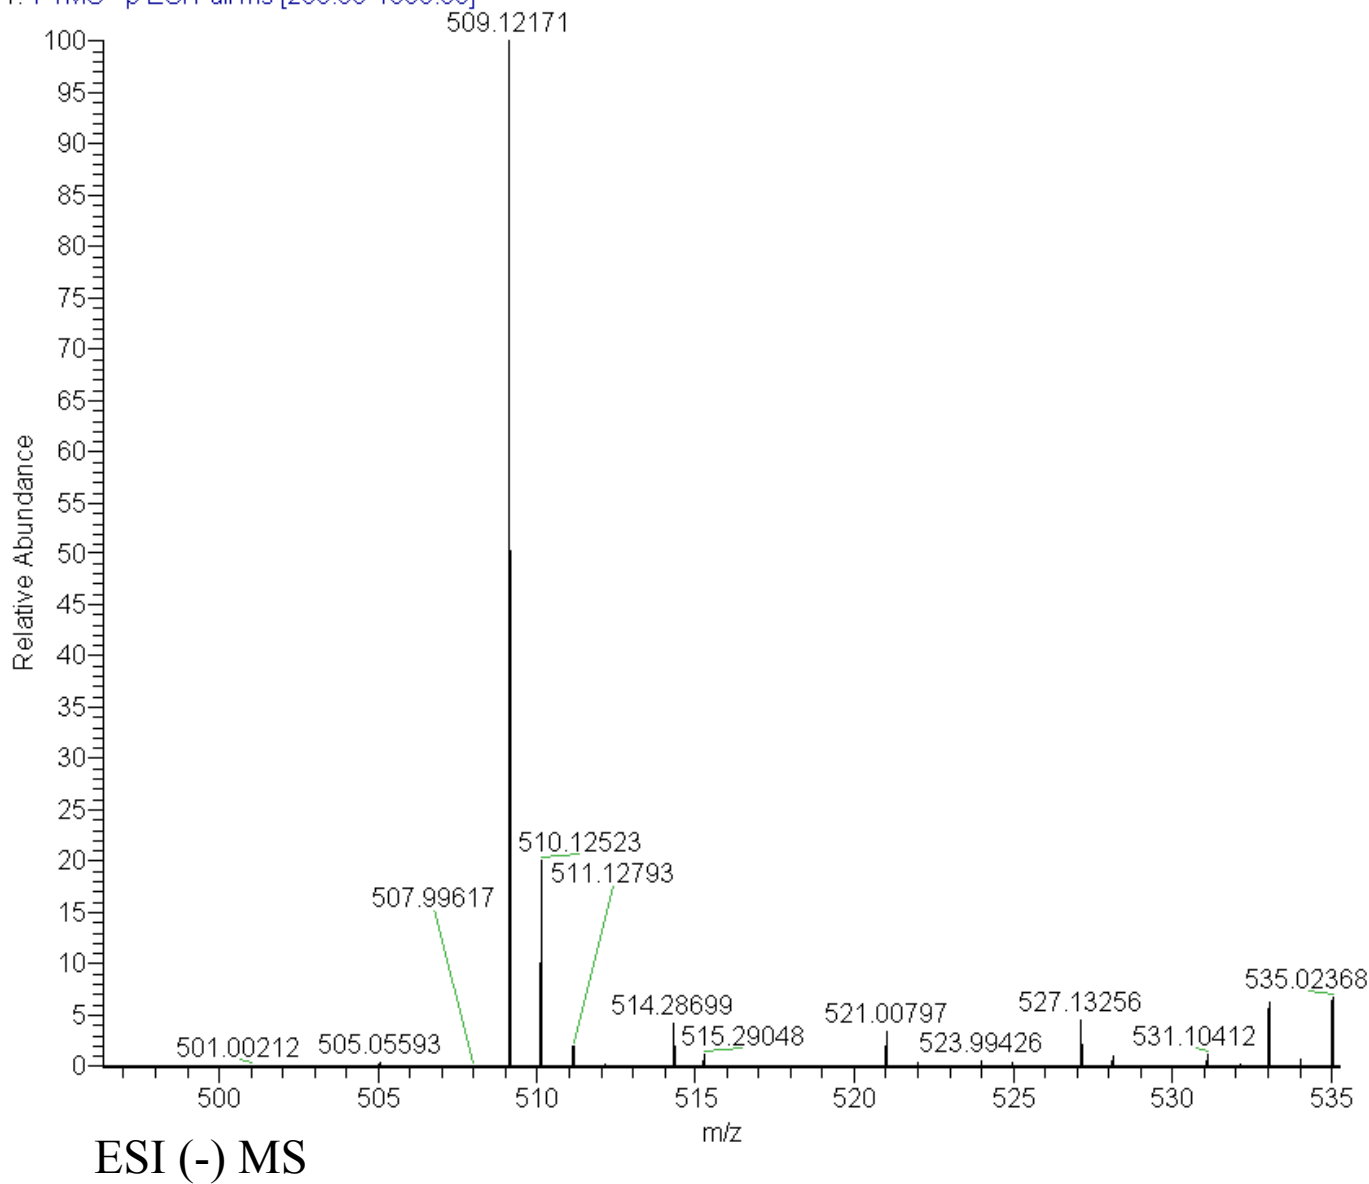

# Mant-m<sup>7</sup>GMP

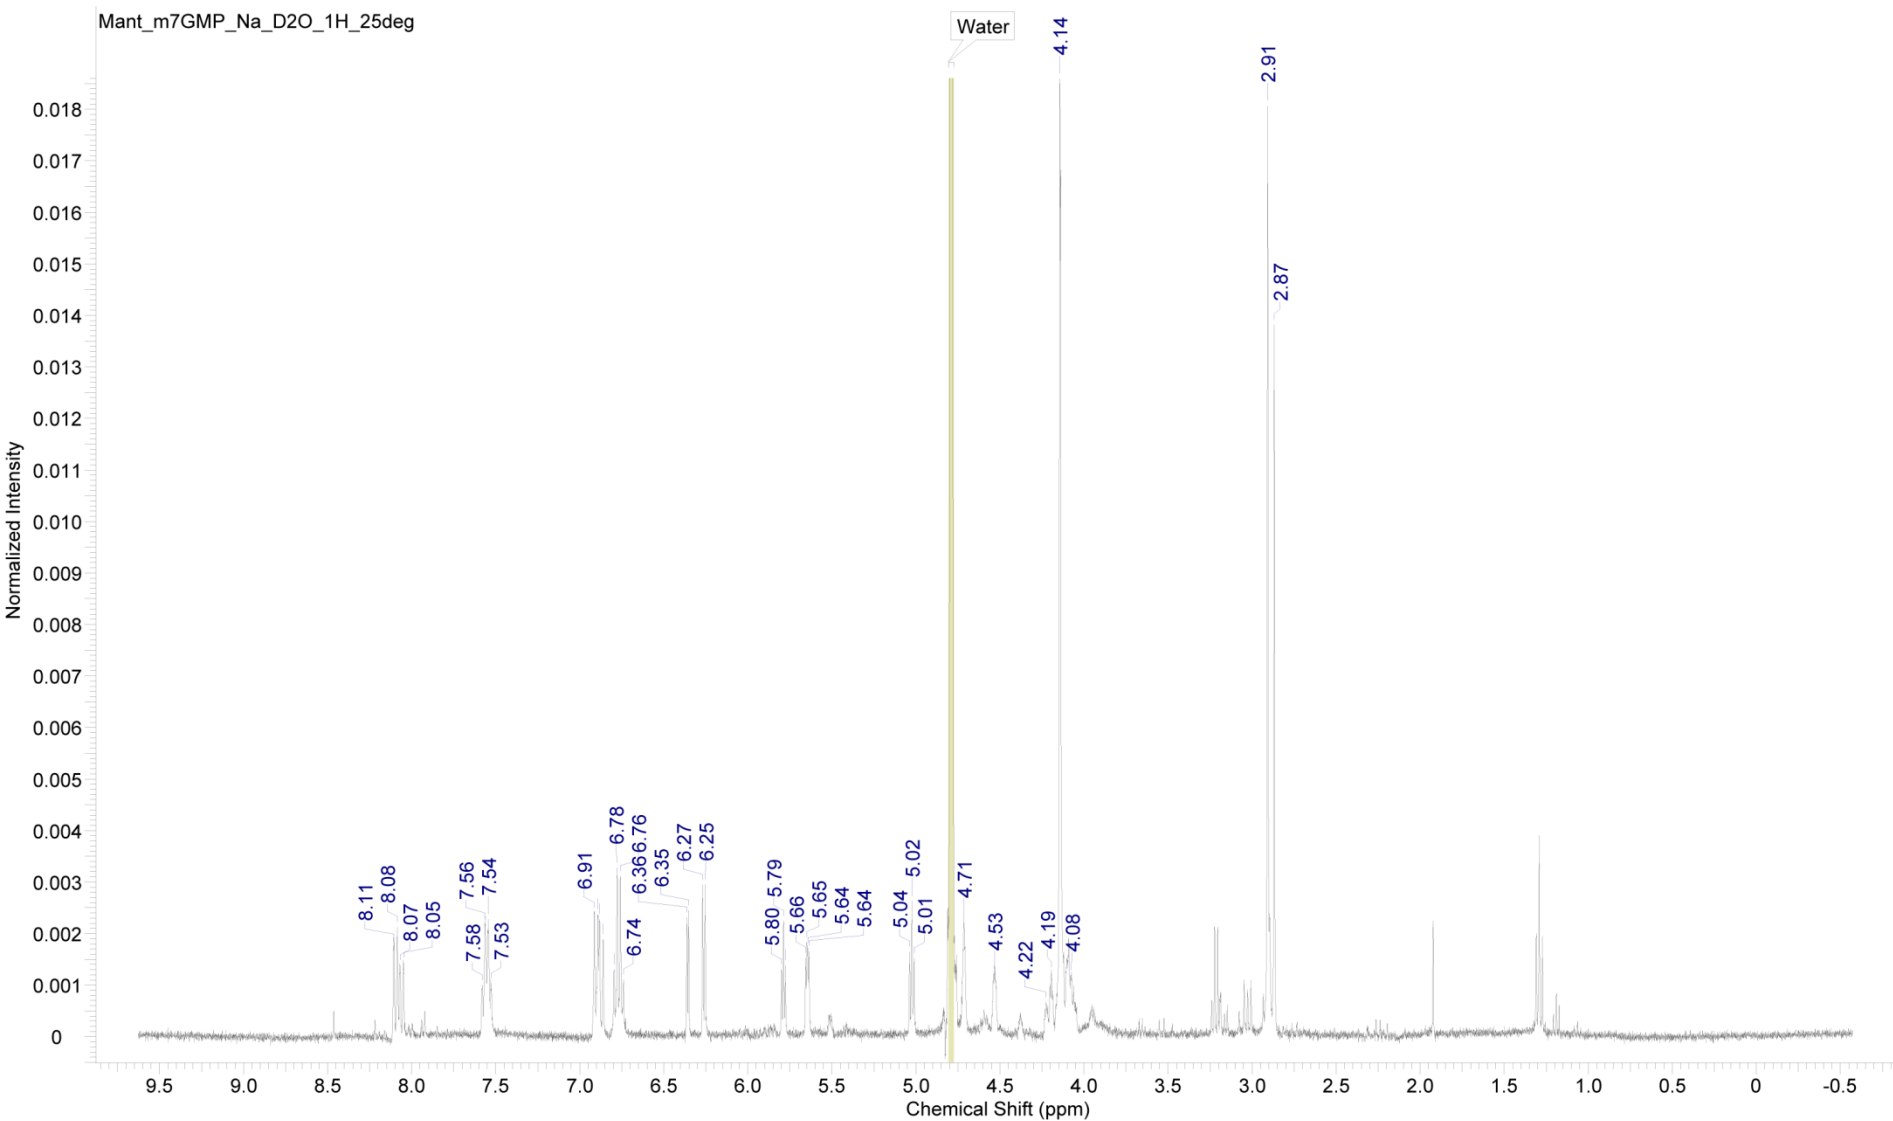

<sup>1</sup>H NMR

# Mant-m<sup>7</sup>GMP

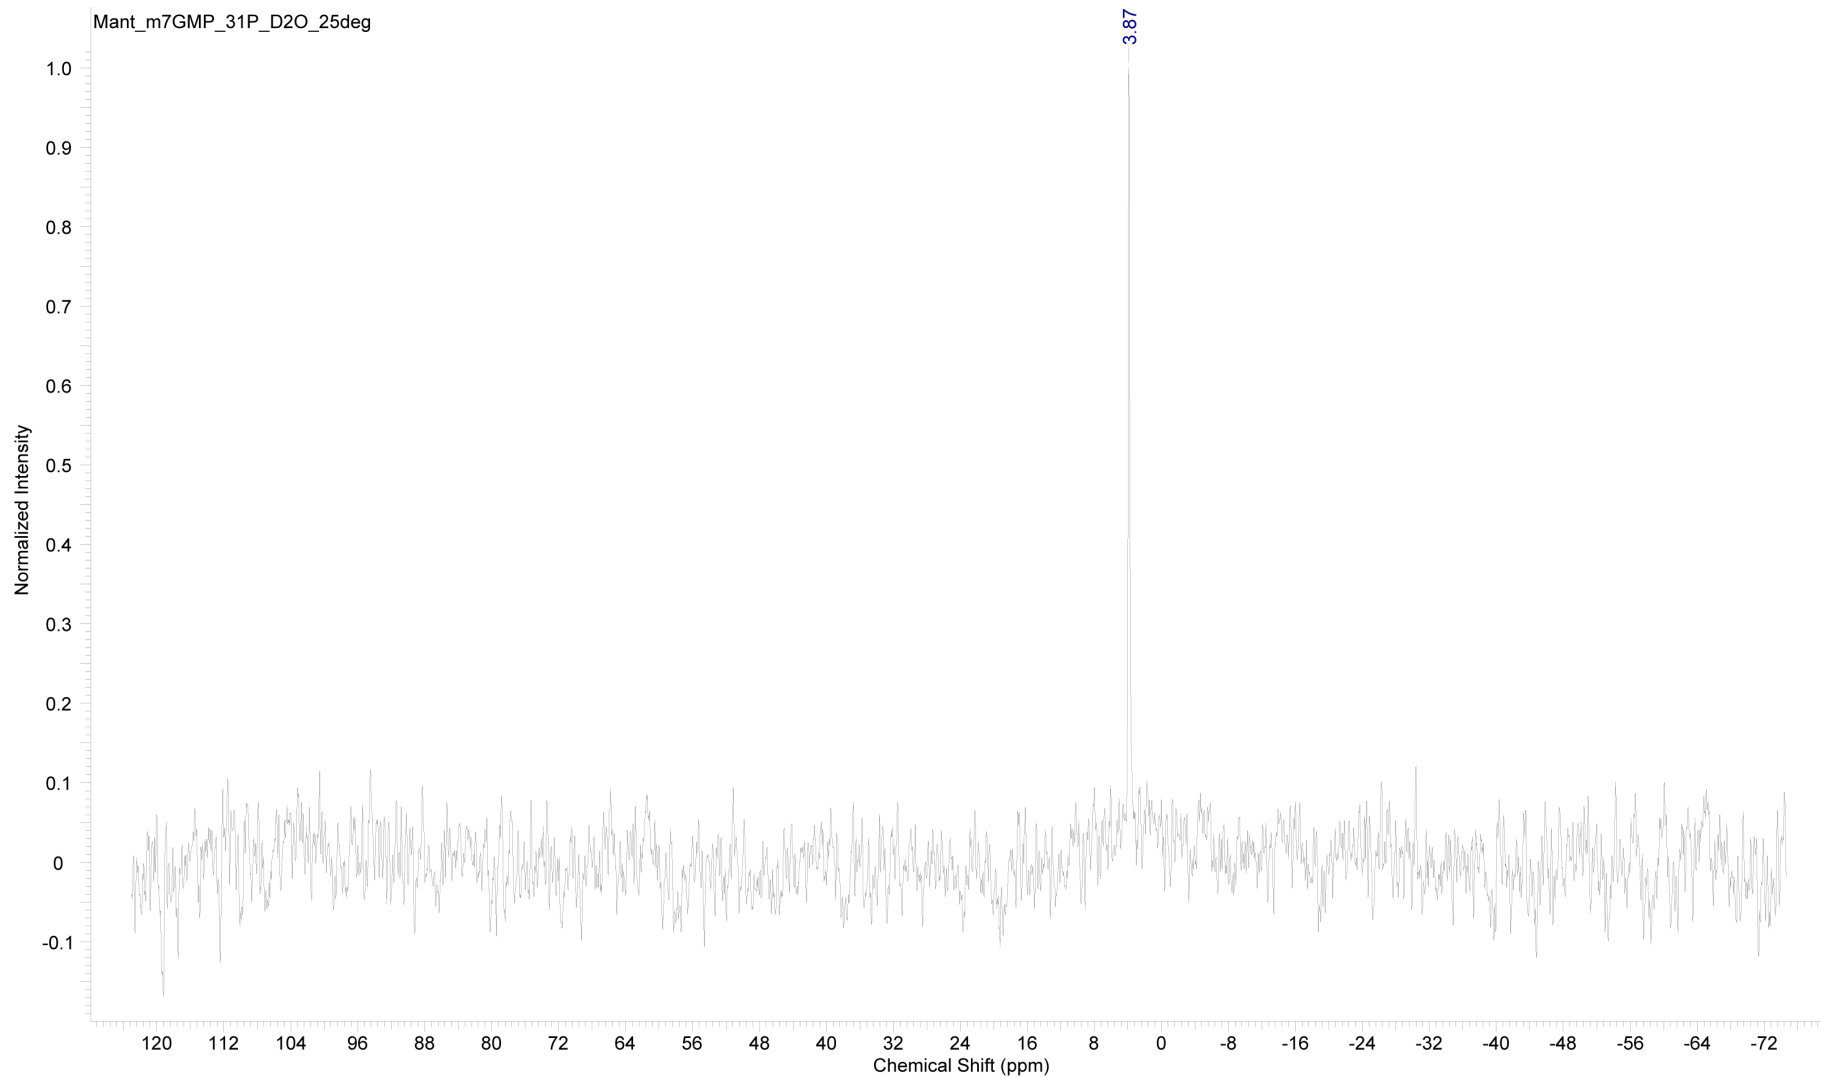

<sup>31</sup>P NMR
